# Supplementary material for: Mapping of cis-acting expression quantitative trait loci in human scalp hair follicles
Source: Springer Nature journal article supplement (doi:10.1186/s12895-020-00113-y), 2020-11-10
Supplement: MOESM1 [file 18573216]

## SUPPLEMENTARY FIGURES

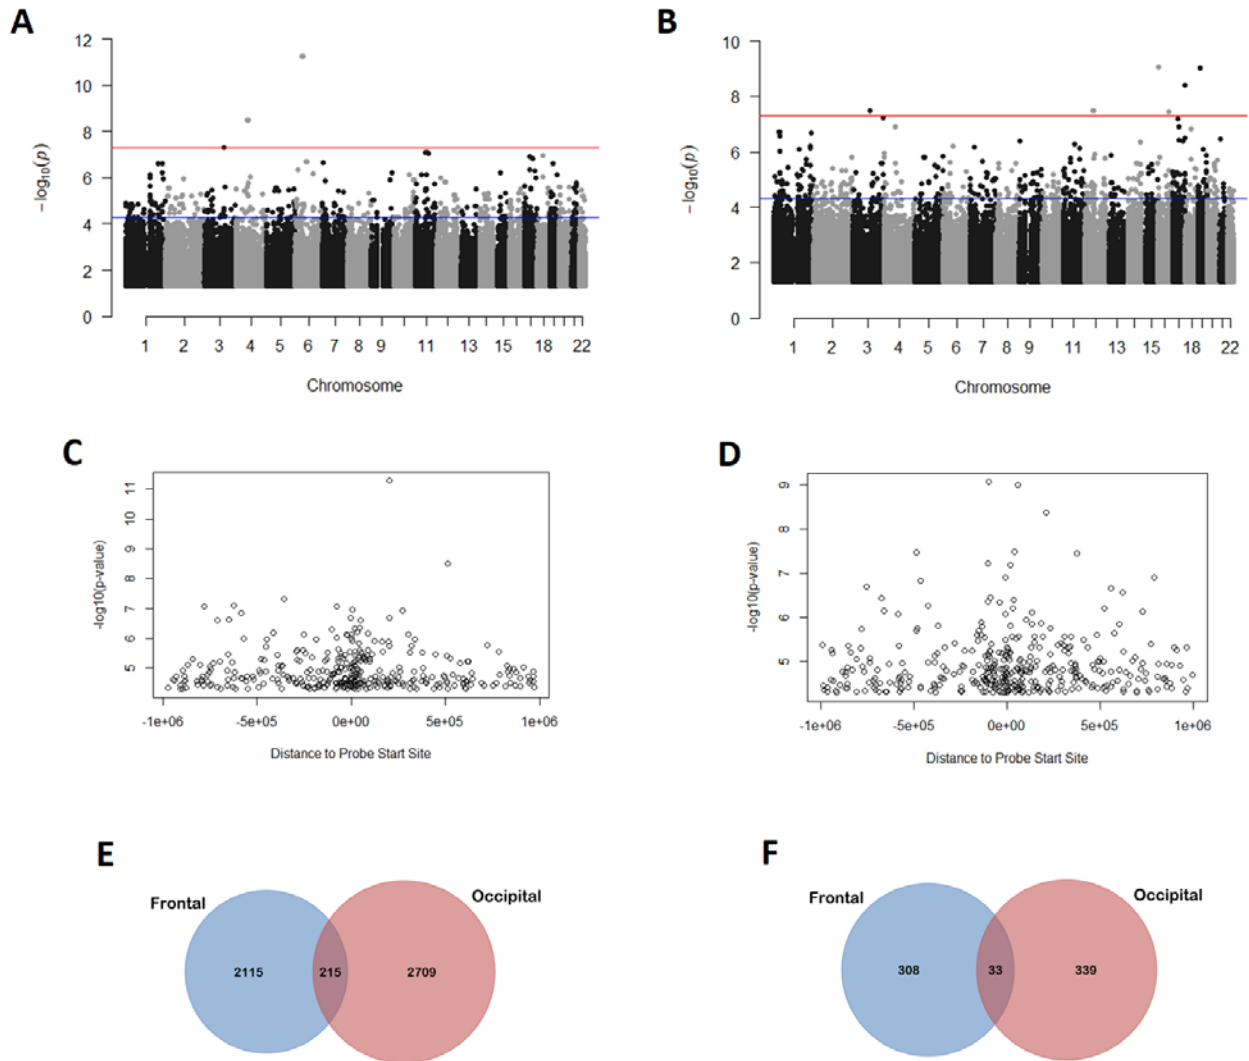

**Suppl. Figure 1.** Frontal and occipital scalp eQTLs in the replication sample. A) Manhattan plot of nominal frontal eQTLs. B) Manhattan plot of nominal occipital eQTLs. C) Plot of P-value and distance to probe start site for frontal eQTLs with  $p < 5 \times 10^{-5}$  (top variant per probe). D) Plot of P-value and distance to probe start site for occipital eQTLs with  $p < 5 \times 10^{-5}$  (top variant per probe). E) Venn diagram of eSNPs in frontal and occipital scalp. F) Venn diagram of eSNPs in frontal and occipital scalp. G) Venn diagram of eGenes in frontal and occipital scalp.

**A**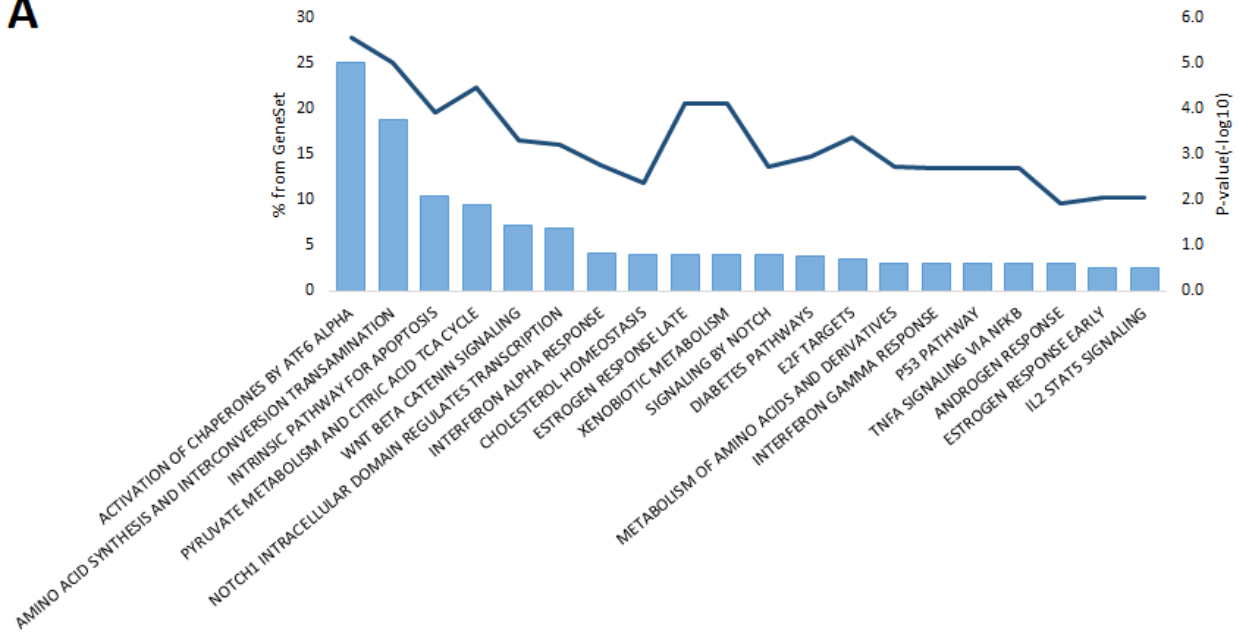**B**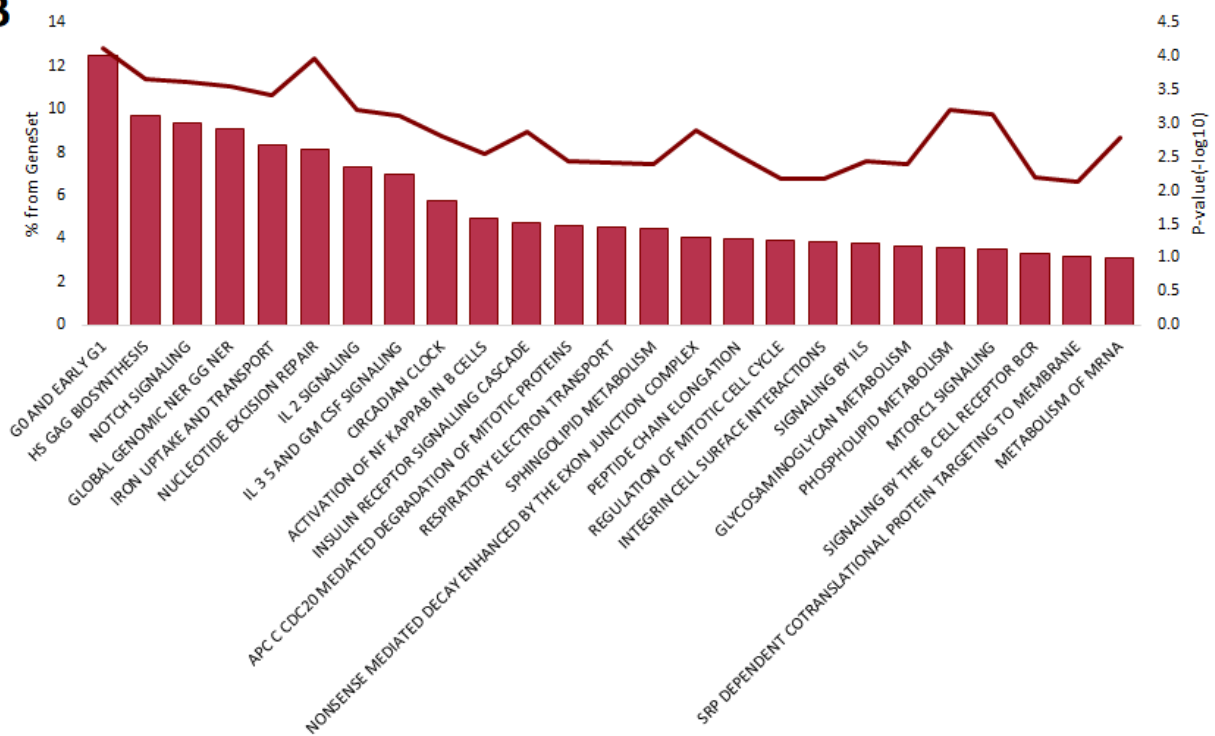

**Suppl. Figure 2.** FUMA Hallmark and Reactome pathway enrichments for the differential analysis.

A) Frontal-specific pathway terms. B) Occipital-specific pathway terms.
