# Supplementary material for: Mapping of cis-acting expression quantitative trait loci in human scalp hair follicles
Source: BMC Dermatol. 2020 Nov 10;20:16. doi: 10.1186/s12895-020-00113-y (PMC7653834; doi:10.1186/s12895-020-00113-y)
Supplement: Supplementary file 2 — Additional file 2. Supplementary Figures. [file 12895_2020_113_MOESM2_ESM.xlsx]

## Sheet: Suppl.Table.1
Suppl.Table.1	Independent, highly confident hair follicle eQTLs.
Gene	Chr	Start	End	Strand	# eQTLs	Best SNP	Chr	Position	A1	A2	Best Probe	# Probes	Distance	Pval	FDR	Slope	Annot.eQTL	SameGene	GWAS catalog trait
IPO8	12	30782260	30782308	-	183	rs7326	12	30782301	G	A	ILMN_1753164	1	0	5.17484e-31	1.56e-24	-0.683955	Y	Y	NA
USMG5/ATP5MD	10	105154021	105154069	-	95	rs2271751	10	105175131	C	T	ILMN_1773313	1	-21062	5.8e-26	3.21e-20	1.10035	Y	Y	NA
C17ORF97	17	264273	264321	+	35	rs11150881	17	259304	G	A	ILMN_1707137	2	-4714	2.18e-25	1.18e-19	0.660041	Y	Y	NA
TIMM10	11	57296018	57296066	-	9	rs3851117	11	57237113	A	G	ILMN_1765332	1	58905	4.6e-25	2.11e-19	-0.839089	Y	Y	NA
KCTD10	12	109886626	109886674	-	211	rs4766601	12	109890080	C	G	ILMN_1719064	1	-3406	9.89e-25	4.49e-19	0.577318	Y	Y	NA
C5ORF35/SETD9	5	56210794	56210793	+	50	rs2591963	5	56237135	A	T	ILMN_1757636	1	26342	1.5e-24	6.43e-19	-0.693024	Y	Y	NA
NDUFS5	1	39494453	39494501	+	45	rs374279960	1	39484742	G	T	ILMN_1776104	1	-9711	2.36e-24	1.01e-18	-0.249577	N	NA	NA
LOC339804	2	61390266	61390314	+	267	rs3213944	2	61372298	G	C	ILMN_1754501	1	-17968	8.36e-24	2.5e-18	0.447082	Y	N	NA
FMO1	1	171254830	171254878	+	45	rs6674596	1	171235088	T	A	ILMN_1684401	1	-19742	1.03873e-23	3.07e-18	1.39127	Y	N	NA
PARP12	7	139723788	139723836	-	32	rs2286197	7	139726467	G	A	ILMN_1718558	1	-2631	1.18573e-23	3.46e-18	0.340185	Y	Y	NA
SH3YL1	2	218190	218238	-	50	rs62114506	2	242793	C	G	ILMN_1712231	1	-24555	1.30336e-23	3.78e-18	-0.588621	Y	Y	NA
PEX6	6	42931901	42931949	-	57	rs3805946	6	42955749	C	T	ILMN_1683279	1	-23800	1.47e-23	4.11e-18	0.56509	Y	Y	NA
FN3KRP	17	80685670	80685718	+	109	rs2249888	17	80675738	G	A	ILMN_1652333	1	-9932	1.54327e-23	4.11e-18	0.334074	Y	Y	NA
BCR	22	23522597	23522645	+	44	rs131703	22	23652201	G	A	ILMN_1670398	3	129556	6.23252e-23	1.36e-17	0.444527	Y	Y	NA
PSMG1	21	40550381	40550429	-	295	rs35064900	21	40555492	G	A	ILMN_1659285	2	-5063	7.92e-23	1.55e-17	-0.39167	Y	Y	NA
RPS26L/RPS26	12	56437210	56437258	+	47	rs773114	12	56379060	T	A	ILMN_1695585	1	-58150	1.14e-22	2.12e-17	0.438637	Y	Y	NA
GOLGB1	3	121383159	121383207	-	24	rs9968051	3	121384081	G	C	ILMN_1747935	1	-874	3.19752e-22	5.56e-17	-0.610398	Y	Y	NA
ERP27	12	15067073	15067121	-	182	rs12312821	12	15077527	T	A	ILMN_1655261	1	-10406	4.48209e-22	7.63e-17	-0.638506	Y	Y	NA
SLC47A2	17	19581729	19581777	-	51	rs12451902	17	19619063	G	A	ILMN_1693912	1	-37286	1.02e-21	1.65e-16	0.685546	N	NA	NA
ABHD12	20	25275568	25275616	-	517	rs2258728	20	25276343	A	G	ILMN_1745116	1	-727	1.91374e-21	2.88e-16	0.273714	Y	Y	NA
EPHX2	8	27402077	27402125	+	70	rs1042032	8	27402074	G	A	ILMN_1709237	1	-3	1.99e-21	2.99e-16	0.4163	Y	Y	NA
POLB	8	42229137	42229185	+	27	rs2272615	8	42219048	G	A	ILMN_1767894	1	-10089	2.21e-21	3.04e-16	0.539928	Y	Y	NA
PPIL3	2	201735781	201735829	-	151	rs2136600	2	201742345	T	C	ILMN_1770020	1	-6516	2.73e-21	3.34e-16	-0.382319	Y	Y	NA
CDK5RAP2	9	123151212	123151260	-	33	rs872423	9	123149491	A	G	ILMN_1655990	2	1721	3.17972e-21	3.77e-16	-0.368072	Y	Y	NA
KDELR2	7	6502704	6502752	-	18	rs2347784	7	6524843	G	C	ILMN_1724293	1	-22091	4.8e-21	5.46e-16	-0.258312	Y	Y	Lymphocyte counts; Blood protein levels
EML3	11	62369697	62369745	-	68	rs58720921	11	62332306	G	A	ILMN_1772644	1	37391	6.93723e-21	7.55e-16	0.247683	Y	Y	NA
FAHD1	16	1877806	1877854	+	245	rs3925438	16	1895438	G	A	ILMN_1701457	2	17584	2.45e-20	1.71e-15	0.611641	Y	Y	NA
DEFB1	8	6735348	6735396	-	35	rs1344197	8	6728886	G	T	ILMN_1686573	1	6462	4.6e-20	2.91e-15	0.943159	Y	Y	NA
LACTB2	8	71549664	71549712	-	146	rs67469377	8	71479026	C	A	ILMN_1660635	1	70638	2.78e-19	1.32e-14	0.415254	Y	N	NA
GSDMC	8	130760677	130760725	-	32	rs4144736	8	130761030	C	G	ILMN_1721732	1	-305	6.18209e-19	2.87e-14	0.523049	Y	Y	NA
SEMA4G	10	102743721	102743769	+	48	rs12571302	10	102742763	A	C	ILMN_1678974	2	-958	1.03465e-18	4.36e-14	0.369006	Y	N	NA
MCOLN2	1	85391508	85391556	-	124	rs677476	1	85418307	G	C	ILMN_1660462	1	-26751	1.11e-18	4.51e-14	-0.241152	Y	Y	NA
PYGB	20	25278302	25278350	+	265	rs3787080	20	25232604	G	C	ILMN_1778360	1	-45698	3.81e-18	1.45e-13	-0.408895	Y	Y	NA
RGMB	5	98132047	98132095	+	6	rs1053451	5	98132052	C	A	ILMN_1776213	1	0	8.52e-18	3.09e-13	-0.343876	Y	Y	NA
WFDC3	20	44404092	44404140	-	177	rs1386504	20	44351515	C	A	ILMN_1740415	2	52577	1.37854e-17	4.85e-13	-1.05686	Y	Y	NA
PIGP	21	38439575	38439623	-	269	rs7337	21	38437763	G	C	ILMN_1764871	2	1812	1.93139e-17	6.54e-13	0.206857	Y	Y	NA
ADCY3	2	25042098	25042146	-	174	rs6718510	2	25122323	C	A	ILMN_1676893	1	-80177	2.27e-17	7.49e-13	-0.269547	Y	Y	NA
POLE4	2	75196634	75196682	+	47	rs12366	2	75185856	T	G	ILMN_1660063	1	-10778	3.25e-17	1.06e-12	0.16906	Y	Y	NA
CPNE1	20	34214122	34214170	-	406	rs9620	20	34633899	T	C	ILMN_1670841	1	-419729	4.69353e-17	1.51e-12	-0.456575	Y	Y	NA
HSD17B12	11	43877535	43877583	+	22	rs1061810	11	43877934	A	C	ILMN_1702168	1	351	1.64e-16	4.48e-12	-0.367958	Y	Y	Type 2 diabetes
PJA2	5	108670471	108670519	+	170	rs114734958	5	108670476	C	G	ILMN_1688702	1	0	2.68733e-16	6.62e-12	-0.553511	Y	Y	NA
LOC642293	20	168575	168623	-	1	rs117340986	20	215958	A	G	ILMN_1724394	1	-47335	4.49e-16	1.1e-11	0.178315	N	NA	NA
KCNK1	1	233807451	233807499	+	10	rs73107506	1	233807465	A	G	ILMN_1718863	1	0	4.64991e-16	1.13e-11	-0.339004	Y	Y	NA
RABEP1	17	5288638	5288686	+	206	rs17635627	17	5296059	T	C	ILMN_1719622	1	7373	6.74526e-16	1.6e-11	0.356229	Y	Y	NA
AMFR	16	56395779	56395827	-	29	rs2617846	16	56397153	A	G	ILMN_1723116	2	-1326	6.91596e-16	1.63e-11	0.407124	Y	Y	NA
DDT	22	24313756	24313804	-	14	rs141411932	22	24302194	A	G	ILMN_1690982	1	11562	9.04e-16	2.11e-11	-0.188297	Y	Y	NA
AIM1	6	107017702	107017750	+	83	rs72941326	6	106983481	T	C	ILMN_1688625	1	-34221	1.23e-15	2.61e-11	-0.444426	N	NA	NA
SLC38A1	12	46581918	46581966	-	8	rs11183388	12	46581573	G	T	ILMN_1769911	1	345	1.44632e-15	3.01e-11	-0.295101	N	NA	NA
CWF19L1	10	101992120	101992168	-	36	rs11596950	10	101996360	T	C	ILMN_1651886	1	-4192	1.45005e-15	3.01e-11	0.167535	Y	Y	NA
CHMP4C	8	82671481	82671529	+	7	rs35094336	8	82670771	A	G	ILMN_1711542	1	-710	2.2418e-15	4.55e-11	-0.684268	Y	Y	NA
MGC16169/TBCK	4	106967645	106967693	-	221	rs17259572	4	106961234	A	G	ILMN_1769601	1	6411	4.102e-15	7.26e-11	0.324725	Y	Y	NA
GSTT1	22	24376378	24376426	-	22	rs7289655	22	24335228	C	A	ILMN_1730054	1	41150	4.23274e-15	7.47e-11	-1.29198	Y	N	NA
TMEM63A	1	226033489	226033537	-	9	rs6426090	1	226052638	C	T	ILMN_1719649	1	-19101	5.90824e-15	1.03e-10	0.237135	Y	Y	NA
LOC388588	1	3692415	3692463	+	47	rs7531757	1	3692749	T	G	ILMN_1749834	1	286	6.16e-15	1.07e-10	0.464035	Y	N	NA
GSDMD	8	144645136	144645184	+	47	rs80346174	8	144640506	C	G	ILMN_1665428	1	-4630	7.11e-15	1.23e-10	-0.26268	Y	Y	NA
PLOD2	3	145787528	145787576	-	123	rs17413767	3	145867635	C	A	ILMN_1771599	1	-80059	7.58e-15	1.3e-10	0.271894	Y	Y	NA
POLE	12	133200611	133200659	-	77	rs7138235	12	133313237	C	T	ILMN_1728199	1	-112578	7.80435e-15	1.34e-10	-0.235619	Y	Y	NA
UBE2L3	22	21978189	21978237	+	81	rs8137950	22	21969640	C	T	ILMN_1677877	1	-8549	1.03e-14	1.76e-10	0.204191	NA	NA	Mean corpuscular volume
POLR2L	11	839974	840022	-	26	rs34956804	11	837084	A	G	ILMN_1670037	1	2890	1.10099e-14	1.87e-10	-0.331817	Y	Y	NA
KRT6C	12	52862682	52862730	+	98	rs3914291	12	52892276	A	G	ILMN_1754576	1	29546	1.18e-14	2e-10	-1.30699	N	NA	NA
MAPRE1	20	31437835	31437883	+	53	rs66499347	20	31448696	T	C	ILMN_1777721	1	10813	1.19876e-14	2.03e-10	-0.154434	Y	Y	NA
C3ORF54/INKA1	3	49842308	49842356	+	129	rs9821675	3	49902544	G	A	ILMN_1690454	1	60188	1.21292e-14	2.05e-10	0.181176	Y	Y	NA
RAD51C	17	56772404	56772452	+	269	rs12947982	17	57140301	G	A	ILMN_1695386	3	367849	1.26255e-14	2.13e-10	0.247463	Y	Y	NA
RRP7A	22	42908625	42908673	-	105	rs56087170	22	42894834	G	C	ILMN_1688178	1	13791	1.32e-14	2.22e-10	-0.684697	Y	Y	NA
RPF2	6	111345440	111345488	+	23	rs62421864	6	111342098	A	G	ILMN_1664167	1	-3342	1.73e-14	2.84e-10	-0.247736	Y	Y	NA
CALCR	7	93054272	93054320	-	102	rs35957168	7	93193773	T	A	ILMN_1710219	1	-139453	2.07566e-14	3.32e-10	0.26222	N	NA	NA
BMP7	20	55745595	55745643	-	6	rs6025425	20	55752204	C	G	ILMN_1741566	1	-6561	2.64751e-14	4.21e-10	0.314707	Y	Y	NA
KRT83	12	52708191	52708239	-	43	rs11615122	12	52722110	C	A	ILMN_1677586	1	-13871	3.25e-14	5.14e-10	-0.392119	Y	Y	NA
PAAF1	11	73638382	73638430	+	9	rs117816201	11	73664450	A	G	ILMN_1652753	1	26020	3.46e-14	5.45e-10	-0.363468	Y	Y	NA
GNB1L	22	19776033	19776081	-	27	rs12483857	22	19777383	T	C	ILMN_1761044	1	-1302	3.64e-14	5.7e-10	0.299449	N	NA	NA
WDR18	19	994457	994505	+	49	rs11883282	19	984682	G	C	ILMN_1694479	1	-9775	4.7229e-14	7.14e-10	0.263198	Y	Y	NA
NQO2	6	3017147	3017195	+	19	rs4149358	6	3003970	G	A	ILMN_1712918	1	-13177	5.72e-14	8.4e-10	-0.3103	NA	NA	NA
GSTO2	10	106059042	106059090	+	35	rs568526	10	106033439	C	T	ILMN_1740234	1	-25603	6e-14	8.75e-10	0.155872	Y	Y	NA
SLC25A37	8	23429455	23429503	+	41	rs2928682	8	23435117	A	G	ILMN_1715969	1	5614	6.263e-14	9.06e-10	-0.270839	N	NA	NA
FXYD6	11	117707814	117707862	-	18	rs11601324	11	117731269	C	G	ILMN_1768812	1	-23407	6.54952e-14	9.4e-10	-0.309652	N	NA	NA
SNAP29	22	21243893	21243941	+	93	rs5752201	22	21244229	G	T	ILMN_1659857	1	288	6.55351e-14	9.4e-10	-0.440491	Y	Y	NA
C9ORF95/NMRK1	9	77676213	77676261	-	16	rs11144225	9	77707300	T	A	ILMN_1674650	1	-31039	6.93332e-14	9.93e-10	-0.27724	Y	Y	NA
KRT23	17	39093390	39093438	-	9	rs8070427	17	39093376	T	C	ILMN_1726409	1	14	8.46e-14	1.18e-09	0.226365	Y	Y	NA
MAP6D1	3	183533814	183533862	-	79	rs262988	3	183481731	A	C	ILMN_1688464	1	52083	9.62715e-14	1.26e-09	0.22725	Y	Y	NA
ZFAND2A	7	1192580	1192628	-	19	rs12538544	7	1217440	C	A	ILMN_1694671	1	-24812	1.19e-13	1.53e-09	0.296983	Y	Y	NA
RNF144	2	7183907	7183955	+	23	rs4669127	2	7160439	A	G	ILMN_1777660	1	-23468	1.45467e-13	1.84e-09	0.229975	N	NA	NA
CLUAP1	16	3562400	3562448	+	6	rs12448212	16	3636809	C	G	ILMN_1750596	2	74361	1.51117e-13	1.9e-09	0.222601	Y	Y	NA
CRLS1	20	6015111	6015159	+	10	rs6139895	20	6003893	G	C	ILMN_1737685	1	-11218	1.79e-13	2.23e-09	-0.160585	Y	Y	NA
FLJ23152	6	17131437	17131485	+	8	rs72831859	6	17125970	G	A	ILMN_1696243	1	-5467	1.83e-13	2.28e-09	0.153789	Y	N	NA
LYSMD2	15	52015557	52015605	-	107	rs7496198	15	52029533	T	C	ILMN_1724493	1	-13928	2.32433e-13	2.85e-09	0.42638	Y	N	NA
MS4A6A	11	59940546	59940594	-	56	rs1441585	11	59855711	C	T	ILMN_1721035	1	84835	2.38e-13	2.88e-09	0.572116	Y	Y	NA
C5ORF13/NREP	5	111065291	111065339	-	99	rs200103277	5	110902568	C	G	ILMN_1680738	1	162723	2.88596e-13	3.4e-09	0.294886	N	NA	NA
LOC401934	1	1007518	1007566	+	1	rs146710206	1	1998878	A	G	ILMN_1712177	1	991312	3.32e-13	3.88e-09	0.512409	N	NA	NA
LOC649859	18	3262676	3262724	+	5	rs1372998	18	3265304	A	G	ILMN_1725204	1	2580	3.4772e-13	4.05e-09	-0.287784	Y	N	NA
HLA-DMA	6	32916412	32916460	-	28	rs9276931	6	32928984	G	A	ILMN_1695311	1	-12524	4.32065e-13	5e-09	0.739117	Y	Y	NA
ARL4A	7	12726561	12726609	+	14	rs35689560	7	12730362	G	A	ILMN_1743241	4	3753	4.87217e-13	5.57e-09	-0.29462	Y	Y	NA
SLC25A13	7	95749802	95749850	-	9	rs117743116	7	95769621	C	T	ILMN_1668012	1	-19771	4.94025e-13	5.63e-09	-0.631253	N	NA	NA
FAM80A/RIMKLA	1	42880571	42880619	+	29	rs11577362	1	42876851	T	A	ILMN_1706664	1	-3720	5.34961e-13	6.05e-09	0.0773923	Y	Y	NA
C14ORF78/AHNAK2	14	105403647	105403695	+	87	rs181484313	14	105314320	C	T	ILMN_1657111	2	-89327	6.9e-13	7.36e-09	-0.527159	Y	N	NA
C10ORF10/DEPP1	10	45471953	45472001	-	6	rs11239302	10	45485952	T	C	ILMN_1767556	1	-13951	7.4e-13	7.86e-09	0.537691	Y	N	NA
C3ORF21/XXYLT1	3	194789099	194789147	-	77	rs1832666	3	194991971	A	G	ILMN_1671116	1	-202824	8.01721e-13	8.49e-09	-0.182633	Y	Y	NA
MPP2	17	41952822	41952870	-	16	rs105025	17	41987441	A	G	ILMN_1654217	1	-34571	8.02298e-13	8.49e-09	0.213943	Y	Y	NA
SLC27A2	15	50528159	50528207	+	6	rs145660324	15	50504160	T	C	ILMN_1700831	1	-23999	8.71003e-13	9.2e-09	0.150929	Y	Y	NA
SMG7	1	183511508	183511556	+	5	rs1044879	1	183522752	C	G	ILMN_1706553	2	11196	1.0319e-12	1.09e-08	-0.163118	Y	Y	NA
CYP2J2	1	60359239	60359287	-	17	rs1834512	1	60380595	T	G	ILMN_1758731	1	-21308	1.23855e-12	1.29e-08	0.297854	Y	Y	NA
GNE	9	36214676	36214724	-	15	rs10114702	9	36262120	T	C	ILMN_1729417	1	-47396	1.25e-12	1.3e-08	-0.160867	Y	Y	NA
SEMA4B	15	90772625	90772673	+	2	rs34560261	15	90734426	T	C	ILMN_1672589	1	-38199	1.28e-12	1.33e-08	-0.290832	Y	Y	NA
CFD	19	863272	863320	+	2	rs71335276	19	859368	T	G	ILMN_1777190	1	-3904	1.49961e-12	1.55e-08	0.713914	Y	Y	NA
HAUS4	14	23415652	23415700	-	19	rs1951120	14	23429713	C	T	ILMN_1771003	1	-14013	1.65e-12	1.7e-08	0.188056	Y	Y	Cortical amyloid beta load
UNC93A	6	167729005	167729053	+	15	rs73037018	6	167713656	T	C	ILMN_1746652	1	-15349	1.71798e-12	1.76e-08	-0.912202	Y	Y	NA
CRYBB2	22	25853296	25853344	+	32	rs6519611	22	25845855	G	C	ILMN_1760708	1	-7441	1.85e-12	1.88e-08	0.464828	Y	N	NA
HAGH	16	1859235	1859283	-	44	rs171162	16	1884501	T	A	ILMN_1772731	1	-25218	1.87e-12	1.9e-08	0.189713	Y	Y	NA
ISCU	12	108962664	108962712	+	11	rs3214424	12	108942775	G	C	ILMN_1735432	1	-19889	1.92577e-12	1.95e-08	0.306182	N	NA	NA
SIGLEC12	19	51994859	51994907	-	3	rs112084300	19	51364817	T	C	ILMN_1695949	2	630042	2.10959e-12	2.13e-08	0.604295	N	NA	NA
SPATA20	17	48633144	48633192	+	27	rs76022681	17	48625223	T	C	ILMN_1687247	1	-7921	2.26954e-12	2.27e-08	-0.504852	Y	Y	NA
SPAG7	17	4862718	4862766	-	34	rs16954342	17	4907103	A	G	ILMN_1684446	1	-44337	2.29e-12	2.29e-08	0.302424	Y	Y	NA
RPA3	7	7677542	7677590	-	177	rs2301936	7	7679107	C	A	ILMN_1716895	1	-1517	2.29508e-12	2.29e-08	0.300588	Y	Y	NA
PPP2R3C	14	35564271	35564319	-	56	rs8006884	14	35563211	C	T	ILMN_1662617	1	1060	2.32831e-12	2.32e-08	0.156864	Y	Y	Chronic inflammatory diseases (ankylosing spondylitis, Crohn's disease, psoriasis, primary sclerosing cholangitis, ulcerative colitis) (pleiotropy)
EHD4	15	42191829	42191877	-	5	rs112854755	15	42264952	A	G	ILMN_1720083	1	-73075	2.54e-12	2.52e-08	-0.70274	Y	Y	NA
GSDMA	17	38133340	38133388	+	60	rs2305481	17	38138624	A	G	ILMN_1776115	1	5236	2.91e-12	2.88e-08	0.220083	Y	Y	NA
SMARCE1	17	38784122	38784170	-	6	rs9630727	17	38766020	C	T	ILMN_1747857	1	18102	3e-12	2.97e-08	-0.163587	Y	N	NA
ADAM15	1	155032771	155032819	+	1	rs11589479	1	155033308	A	G	ILMN_1751500	2	489	3.29551e-12	3.25e-08	0.247873	Y	Y	Chin dimples; Mosquito bite size
TSPAN10	17	79615686	79615734	+	129	rs9905410	17	79614084	G	A	ILMN_1656194	1	-1602	3.47e-12	3.42e-08	0.379138	Y	Y	NA
RNPEP	1	201975088	201975136	+	16	rs61821517	1	201942377	T	C	ILMN_1738347	1	-32711	3.81e-12	3.74e-08	-0.206741	Y	Y	NA
ATP6V0A4	7	138391183	138391231	-	14	rs113537900	7	138389116	T	C	ILMN_1678186	2	2067	4.23e-12	4.11e-08	-0.350627	N	NA	NA
HBQ1	16	231068	231116	+	37	rs549518637	16	236041	T	G	ILMN_1696183	1	4925	4.52955e-12	4.37e-08	0.256796	NA	NA	NA
UCP2	11	73686017	73686065	-	18	rs56007494	11	73683507	C	G	ILMN_1685625	1	2510	5.07649e-12	4.87e-08	-0.422341	Y	Y	NA
IL17B	5	148753920	148753968	-	4	rs151092378	5	148030415	T	C	ILMN_1766707	1	723505	5.89518e-12	5.59e-08	0.414764	N	N	NA
LDHC	11	18451338	18451386	+	46	rs78762081	11	18430150	C	T	ILMN_1745043	1	-21188	6.76e-12	6.33e-08	0.177804	Y	Y	NA
GNAI3	1	110136766	110136814	+	30	rs3525	1	110136846	A	T	ILMN_1696003	1	32	6.85938e-12	6.41e-08	-0.28809	Y	Y	NA
GNA15	19	3163552	3163600	+	21	rs8112632	19	3138331	C	T	ILMN_1773963	1	-25221	6.91628e-12	6.47e-08	-0.143615	Y	Y	NA
IL20RB	3	136729622	136729670	+	120	rs202067373	3	136685666	G	C	ILMN_1765668	1	-43956	7.81e-12	7.22e-08	-0.786301	NA	NA	NA
MARCH6	5	10435391	10435439	+	67	rs2936581	5	10476857	G	A	ILMN_1757106	1	41418	8.36917e-12	7.72e-08	-0.390619	Y	Y	NA
UGT3A2	5	36035241	36035289	-	37	rs7722700	5	35927166	T	C	ILMN_1655565	1	108075	9.75e-12	8.97e-08	0.564251	N	NA	NA
TMEM80	11	703809	703857	+	25	rs11246253	11	670493	A	T	ILMN_1689868	3	-25242	1.02e-11	9.33e-08	-0.158188	Y	Y	NA
ADCK1	14	78400012	78400060	+	82	rs7493386	14	78307894	C	T	ILMN_1698777	1	-92118	1.06e-11	9.68e-08	-0.180404	Y	Y	NA
PIGN	18	59711986	59712034	-	129	rs28564677	18	59712554	C	T	ILMN_1691112	1	-520	1.08627e-11	9.86e-08	-0.278302	Y	Y	NA
RAB11FIP1	8	37716601	37716649	-	7	rs6991739	8	37752290	G	A	ILMN_1692219	1	-35641	1.1e-11	9.97e-08	0.13689	Y	Y	NA
NUDT2	9	34343479	34343527	+	75	rs67806641	9	34327847	A	T	ILMN_1778347	1	-15632	1.15e-11	1.04e-07	-0.320224	N	NA	NA
ETFDH	4	159627841	159627889	+	14	rs55936281	4	159648596	T	C	ILMN_1758034	1	20707	1.2146e-11	1.1e-07	0.176799	Y	Y	NA
CLDN8	21	31586824	31586872	-	5	rs2832648	21	31553014	A	G	ILMN_1746676	1	33810	1.27031e-11	1.14e-07	0.514449	N	NA	NA
LOC387882	12	105764648	105764696	+	41	rs10735400	12	105689161	C	T	ILMN_1716382	1	-75487	1.34e-11	1.2e-07	0.237414	Y	N	NA
ZRANB1	10	126673454	126673502	+	40	rs77741718	10	126604496	T	C	ILMN_1757742	1	-68958	1.35e-11	1.21e-07	0.393449	N	NA	NA
PEBP1	12	118583141	118583189	+	34	rs411828	12	118741714	G	A	ILMN_1688089	1	158525	1.48752e-11	1.33e-07	0.182257	N	NA	NA
SMOC2	6	169068305	169068353	+	13	rs6902348	6	169049914	A	G	ILMN_1719641	1	-18391	1.59e-11	1.41e-07	0.734727	N	NA	NA
C5ORF4/FAXDC2	5	154198426	154198474	-	158	rs79353578	5	154108660	C	T	ILMN_1728742	2	89766	1.69e-11	1.48e-07	-0.488321	Y	N	NA
UNC5B	10	73059208	73059256	+	1	rs1060184	10	73059358	G	C	ILMN_1692665	1	102	1.71e-11	1.49e-07	0.335413	N	NA	NA
KIAA0892/MAU2	19	19469218	19469266	+	55	rs10403731	19	19469296	A	G	ILMN_1685631	1	30	1.75847e-11	1.53e-07	-0.191963	Y	Y	NA
PEX11A	15	90226437	90226485	-	26	rs72752525	15	90220873	A	G	ILMN_1690695	1	5564	1.8e-11	1.56e-07	0.165917	Y	Y	NA
UBR7	14	93686667	93686715	+	2	rs3783896	14	93690301	G	A	ILMN_1758293	3	16817	1.82e-11	1.57e-07	0.163534	Y	Y	NA
CAV2	7	116140441	116140489	+	27	rs10233003	7	116143662	A	C	ILMN_1735220	1	3173	1.89e-11	1.63e-07	0.227348	Y	Y	Intraocular pressure
AXIN1	16	337629	337677	-	10	rs387467	16	339415	T	G	ILMN_1766185	2	-1738	2.03e-11	1.73e-07	-0.210497	Y	Y	NA
MRPS21	1	150266614	150266662	+	38	rs3818978	1	150266338	A	T	ILMN_1660292	2	-276	2.06258e-11	1.75e-07	-0.178832	Y	Y	NA
SPG21	15	65273264	65273312	-	31	rs4128936	15	65277705	A	G	ILMN_1657423	2	-4393	2.15126e-11	1.82e-07	-0.133706	Y	Y	NA
TRNT1	3	3190342	3190390	+	13	rs3762759	3	3171022	T	C	ILMN_1655924	3	-18584	2.2e-11	1.86e-07	0.231596	Y	Y	NA
CYBRD1	2	172414037	172414085	+	21	rs1558938	2	172378207	G	C	ILMN_1712305	1	-35830	2.28e-11	1.92e-07	-0.256622	Y	Y	NA
KLHL9	9	21331366	21331414	-	1	rs77895351	9	21331370	A	G	ILMN_1664466	1	0	2.6e-11	2.18e-07	-0.535666	N	NA	NA
RAB3B	1	52385110	52385158	-	6	rs2153533	1	52340277	T	C	ILMN_1722845	1	44833	2.63148e-11	2.2e-07	0.296891	Y	N	NA
H1F0	22	38203235	38203283	+	97	rs4820308	22	38176216	A	G	ILMN_1757467	1	-27019	2.77203e-11	2.3e-07	-0.14597	Y	N	NA
EMILIN2	18	2913926	2913974	+	17	rs62074986	18	2855603	G	C	ILMN_1697268	1	-58323	2.9e-11	2.4e-07	0.257503	Y	Y	NA
TMEM9	1	201104134	201104182	-	6	rs1010502	1	201123745	G	C	ILMN_1686748	1	-19563	2.91e-11	2.41e-07	0.154081	Y	Y	NA
VEZT	12	95694337	95694385	+	3	rs7976767	12	95605549	T	C	ILMN_1774828	1	-88788	3.14e-11	2.56e-07	-0.215863	Y	N	NA
C1ORF57/NTPCR	1	233113939	233113987	+	37	rs35690547	1	233114608	T	C	ILMN_1657446	1	621	3.15104e-11	2.57e-07	-0.394909	Y	Y	NA
WDR48	3	39137648	39137696	+	7	rs3736573	3	39129742	C	A	ILMN_1762103	1	-7906	3.58e-11	2.88e-07	0.19864	Y	Y	NA
TIMM22	17	905269	905317	+	17	rs2663344	17	926359	C	A	ILMN_1706959	1	21042	3.60654e-11	2.9e-07	0.280947	NA	NA	NA
ZNF816A/ZNF816	19	53452695	53452743	-	17	rs1808106	19	53452944	G	T	ILMN_1728710	1	-201	3.66e-11	2.94e-07	0.194474	Y	Y	NA
LOC124220/ZG16B	16	2881967	2882015	+	1	rs11865057	16	2869684	C	A	ILMN_1753139	1	-12283	3.92e-11	3.14e-07	-0.372147	Y	Y	NA
NT5C3L	17	39981601	39981649	-	24	rs115089456	17	39999768	C	A	ILMN_1750511	1	-18119	3.95126e-11	3.17e-07	0.317433	N	NA	NA
SMTNL2	17	4511235	4511283	+	12	rs72835603	17	4506873	A	G	ILMN_1740728	1	-4362	4.29977e-11	3.43e-07	-0.534424	N	NA	NA
HIST1H4E	6	26205149	26205197	+	4	rs1324085	6	25902261	T	C	ILMN_1681542	1	-302888	4.4e-11	3.49e-07	0.708757	N	NA	NA
GNA14	9	80038866	80038914	-	1	rs1327545	9	80053781	G	A	ILMN_1686227	1	-14867	4.41727e-11	3.51e-07	0.127875	Y	N	NA
RHPN2	19	33469527	33469575	-	47	rs12459751	19	33538783	G	A	ILMN_1753143	1	-69208	4.43e-11	3.51e-07	-0.306028	N	NA	NA
SGSM2	17	2284231	2284279	+	5	rs73303080	17	2249919	A	T	ILMN_1779171	1	-34312	4.79e-11	3.77e-07	0.195611	Y	Y	NA
LSS	21	47608664	47608712	-	1	rs138465418	21	46942878	G	C	ILMN_1687863	3	665786	4.85e-11	3.82e-07	0.239218	N	NA	NA
NINJ2	12	673539	673587	-	4	rs6489710	12	777008	T	G	ILMN_1731745	1	-103421	5.59e-11	4.35e-07	-0.304853	N	NA	NA
JAG1	20	10618518	10618566	-	4	rs6077845	20	10582748	A	G	ILMN_1691376	1	35770	5.83e-11	4.47e-07	-0.164256	Y	Y	NA
LRP11	6	150140521	150140569	-	395	rs9322225	6	150184882	C	G	ILMN_1676197	1	-44313	6.14e-11	4.67e-07	0.186624	Y	Y	NA
CELSR2	1	109818057	109818105	+	12	rs79868705	1	109815074	A	G	ILMN_1711208	1	-2983	7.11e-11	5.32e-07	0.424563	N	NA	NA
SEPT3(septin3)	22	42394019	42394067	+	0	rs2070116	22	42606257	T	C	ILMN_1746673	2	212190	7.60109e-11	5.67e-07	-0.25188	Y	N	NA
WBSCR27	7	73249065	73249113	-	22	rs3886187	7	73205363	C	T	ILMN_1719170	1	43702	7.91535e-11	5.89e-07	0.168752	Y	Y	NA
C1ORF31/COA6	1	234510022	234510070	+	28	rs10910420	1	234509259	C	G	ILMN_1681741	1	-763	8.02e-11	5.97e-07	0.135471	Y	Y	NA
CIB2	15	78397287	78397335	-	21	rs3784330	15	78420311	C	T	ILMN_1714489	1	-22976	8.3762e-11	6.22e-07	0.237007	Y	Y	NA
GPX7	1	53074305	53074353	+	7	rs835339	1	53062241	C	G	ILMN_1726030	1	-12064	8.51842e-11	6.31e-07	0.222172	Y	Y	NA
EIF2B2	14	75475951	75475999	+	152	rs175080	14	75513828	A	G	ILMN_1713380	1	37829	8.56941e-11	6.35e-07	-0.136155	Y	Y	NA
RYBP	3	72426217	72426265	-	19	rs34790308	3	72451765	C	T	ILMN_1721842	1	-25500	9.37974e-11	6.9e-07	0.553074	N	NA	NA
GALNT11	7	151818944	151818992	+	64	rs28670955	7	152443535	T	C	ILMN_1651819	1	624543	9.44388e-11	6.91e-07	-0.442227	N	NA	NA
GLRX	5	95149973	95150021	-	2	rs3822751	5	95154210	G	C	ILMN_1737308	1	-4189	1.13226e-10	8.12e-07	0.394604	N	NA	NA
SCO1	17	10583937	10583985	-	107	rs4792016	17	10575551	G	T	ILMN_1728975	1	8386	1.14e-10	8.17e-07	-0.0934011	Y	Y	NA
NUP43	6	150045520	150045568	-	355	rs9718079	6	149967083	C	T	ILMN_1661432	1	78437	1.16e-10	8.32e-07	-0.158786	Y	Y	NA
MGP	12	15038737	15038785	-	4	rs1800802	12	15038919	G	A	ILMN_1651958	1	-134	1.16379e-10	8.33e-07	-0.477336	Y	N	NA
INSIG1	7	155095538	155095586	+	40	rs1730194	7	154957737	A	G	ILMN_1686989	1	-137801	1.29e-10	9.19e-07	0.406199	N	NA	NA
IDH2	15	90627513	90627561	-	26	rs7163762	15	90658679	A	G	ILMN_1751753	1	-31118	1.32445e-10	9.43e-07	0.24992	Y	Y	NA
UBA6	4	68482670	68482718	-	56	rs2012551	4	68588431	C	T	ILMN_1675085	1	-105713	1.43e-10	1e-06	0.180385	Y	Y	NA
ASTN2	9	119187628	119187676	-	25	rs77728581	9	120068769	T	C	ILMN_1744118	1	-881093	1.45e-10	1.02e-06	0.248896	N	NA	NA
ITPKA	15	41795686	41795734	+	9	rs316618	15	41796498	A	T	ILMN_1776516	1	764	1.48389e-10	1.03e-06	0.0839112	Y	Y	NA
PSEN2	1	227083618	227083666	+	8	rs6689397	1	226987975	A	C	ILMN_1714417	1	-95643	1.6e-10	1.12e-06	-0.257824	Y	Y	NA
NT5DC2	3	52558614	52558662	-	151	rs4434138	3	52556890	G	A	ILMN_1708743	1	1724	1.648e-10	1.15e-06	-0.158509	Y	Y	Intelligence (MTAG)
C21ORF2	21	45748844	45748892	-	14	rs11702291	21	45763811	A	G	ILMN_1758806	1	-14919	1.65262e-10	1.15e-06	0.148343	Y	Y	NA
ASCC2	22	30184659	30184707	-	53	rs1961926	22	30223813	T	C	ILMN_1679919	1	-39106	1.67e-10	1.16e-06	0.126843	Y	Y	NA
STK36	2	219567379	219567427	+	141	rs6436066	2	219578361	G	T	ILMN_1693538	1	10934	1.69938e-10	1.18e-06	0.188692	Y	N	NA
SLC20A1	2	113420977	113421025	+	20	rs4849106	2	113462989	A	G	ILMN_1672662	1	41964	1.73e-10	1.2e-06	-0.14959	N	NA	NA
SCARA3	8	27530319	27530367	+	3	rs733078	8	27525022	A	G	ILMN_1723358	2	7985	1.9e-10	1.31e-06	0.351348	Y	Y	NA
ROD1	9	114981188	114981236	-	158	rs10817279	9	114939596	A	G	ILMN_1768197	1	41592	2.02101e-10	1.38e-06	-0.0740722	Y	N	NA
CPSF1	8	145618478	145618526	-	40	rs35817095	8	145600697	T	C	ILMN_1654545	1	17781	2.09e-10	1.42e-06	-0.152851	Y	Y	NA
IFI27L2	14	94594187	94594235	-	1	rs2273514	14	94595989	C	T	ILMN_1740319	1	-1754	2.09e-10	1.42e-06	-0.285854	Y	Y	NA
KCNC3	19	50819040	50819088	-	1	rs138753275	19	51386621	T	C	ILMN_1747613	1	-567533	2.11e-10	1.43e-06	0.248276	N	NA	NA
HSD3B7	16	31000061	31000109	+	9	rs4346218	16	30980130	T	A	ILMN_1653042	1	-19931	2.12695e-10	1.44e-06	0.140843	Y	Y	NA
ATP5G1	17	46970207	46970255	+	39	rs11656939	17	46964406	C	G	ILMN_1712430	1	-5801	2.28e-10	1.54e-06	-0.191926	Y	Y	NA
DNAJB1	19	14625979	14626027	-	18	rs8108187	19	14618483	T	G	ILMN_1775304	1	7496	2.35126e-10	1.57e-06	0.159663	Y	Y	NA
C10ORF32/BORCS7	10	104614128	104614176	+	36	rs11191421	10	104623053	G	C	ILMN_1772706	1	8877	2.36e-10	1.58e-06	-0.1787	Y	N	NA
SNX29	16	12667836	12667884	+	202	rs34945677	16	12643918	C	G	ILMN_1659761	1	-23918	2.38e-10	1.58e-06	-0.273462	N	NA	NA
S100A2	1	153533731	153533779	-	2	rs77543908	1	153498645	C	G	ILMN_1725852	1	35086	2.44e-10	1.62e-06	1.10304	N	NA	NA
CRYZ	1	75171374	75171422	-	15	rs455032	1	75196488	T	C	ILMN_1672389	1	-25066	2.55605e-10	1.7e-06	0.355193	Y	Y	NA
GREM1	15	33026329	33026377	+	45	rs139867564	15	33041209	A	T	ILMN_1752965	1	14832	2.61579e-10	1.73e-06	0.8486	N	NA	NA
CCDC136	7	128462092	128462140	+	1	rs147041694	7	129428960	T	C	ILMN_1706935	1	966820	2.64444e-10	1.74e-06	0.51474	N	NA	NA
ALOX12	17	6913667	6913715	+	10	rs9889858	17	6875279	A	C	ILMN_1713731	1	-38388	2.75e-10	1.81e-06	0.262465	N	NA	NA
BST2	19	17513828	17513876	-	2	rs62121692	19	17764670	G	C	ILMN_1723480	1	-250794	2.89e-10	1.9e-06	0.269008	N	NA	NA
HEY2	6	126081010	126081058	+	32	rs9388451	6	126090377	C	T	ILMN_1682034	1	9319	2.93408e-10	1.92e-06	0.165462	Y	Y	Brugada syndrome
SEC61A2	10	12206592	12206640	+	2	rs117302282	10	11477443	T	C	ILMN_1779381	1	-729149	2.99e-10	1.96e-06	0.303201	N	NA	NA
TAF1C	16	84211520	84211568	-	30	rs3803642	16	84208144	G	C	ILMN_1671839	2	3376	3.04e-10	1.98e-06	0.16041	Y	Y	NA
CGN	1	151510992	151511040	+	7	rs61261719	1	151473804	G	A	ILMN_1746801	1	-37188	3.13e-10	2.04e-06	0.278791	Y	Y	NA
PMP2	8	82352736	82352784	-	7	rs138771051	8	82345552	G	A	ILMN_1740706	1	7184	3.20826e-10	2.09e-06	0.556181	N	NA	NA
TNPO3	7	128595347	128595395	-	4	rs10488630	7	128593948	G	A	ILMN_1683811	1	1399	3.25e-10	2.11e-06	-0.18718	Y	Y	NA
MMP10	11	102641560	102641608	-	11	rs555723067	11	101661084	A	G	ILMN_1741847	1	980476	3.27e-10	2.12e-06	0.578271	N	NA	NA
IFITM2	11	309224	309272	+	14	rs34481144	11	320836	T	C	ILMN_1673352	1	11564	3.90972e-10	2.47e-06	-0.393726	Y	Y	NA
ANXA3	4	79531256	79531304	+	28	rs4610364	4	79455115	T	C	ILMN_1694548	1	-76141	4.22e-10	2.65e-06	0.235067	Y	Y	NA
IL1A	2	113531836	113531884	-	11	rs3783547	2	113533339	G	A	ILMN_1658483	1	-1455	4.49828e-10	2.81e-06	0.274032	Y	Y	NA
LOC255783	19	47778877	47778925	+	56	rs10417049	19	47772187	A	T	ILMN_1703316	1	-6690	5.00826e-10	3.09e-06	0.114561	Y	N	NA
TRIM40	6	30114862	30114910	+	1	rs11758495	6	31063903	A	G	ILMN_1653591	1	948993	5.44e-10	3.28e-06	0.24477	N	NA	NA
SMAP1	6	71571314	71571362	+	11	rs17707714	6	71570880	A	T	ILMN_1768271	1	-434	5.67321e-10	3.41e-06	0.361157	N	NA	NA
BAIAP2L2	22	38480947	38480995	-	2	rs12484232	22	38503479	A	G	ILMN_1771652	1	-22484	6.03495e-10	3.58e-06	0.325361	Y	Y	NA
CD151	11	834534	834582	+	3	rs72844798	11	809666	A	G	ILMN_1661589	1	-24868	6.29656e-10	3.73e-06	-0.242237	Y	Y	NA
UBE2Z	17	47006033	47006081	+	1	rs11650158	17	46959208	A	G	ILMN_1692168	2	-26923	6.3e-10	3.73e-06	-0.175599	Y	Y	NA
C3ORF57/SPTSSB	3	161062948	161062996	-	58	rs9290069	3	160890946	G	A	ILMN_1658649	2	172002	6.49831e-10	3.84e-06	-0.22912	Y	Y	NA
SLURP1	8	143823239	143823287	-	15	rs2572914	8	143823858	G	C	ILMN_1705080	1	-571	6.7385e-10	3.96e-06	0.677452	Y	Y	NA
ADAMTSL4	1	150531060	150531108	+	1	rs12740679	1	150262270	G	C	ILMN_1687035	2	-268790	7.01854e-10	4.12e-06	-0.148829	Y	Y	Headache
WDR41	5	76728182	76728230	-	2	rs374003	5	76702203	G	A	ILMN_1778488	1	25979	7.31624e-10	4.28e-06	-0.767133	Y	Y	NA
MMP1	11	102660766	102660814	-	1	rs555723067	11	101661084	A	G	ILMN_1726448	1	999682	8.31e-10	4.81e-06	0.448154	N	NA	NA
PADI3	1	17610478	17610526	+	31	rs72646785	1	17603472	T	G	ILMN_1758888	1	-7006	8.84968e-10	5.07e-06	-0.387479	N	NA	NA
HIST1H1E	6	26157198	26157246	+	2	rs147340429	6	25958357	C	G	ILMN_1746435	1	-198841	9.95332e-10	5.62e-06	1.22055	N	NA	NA
CEBPZ	2	37428990	37429038	-	38	rs3755195	2	37459670	T	G	ILMN_1744147	1	-30632	1.06e-09	5.98e-06	-0.105963	Y	Y	NA
NAPRT1	8	144656968	144657016	-	8	rs896955	8	144658370	T	C	ILMN_1710752	1	-1354	1.1e-09	6.19e-06	-0.494923	Y	Y	NA
RASEF	9	85597430	85597478	-	1	rs11139896	9	85625445	A	G	ILMN_1779517	1	-27967	1.11e-09	6.21e-06	-0.360269	Y	Y	NA
C8ORF40/SMIM19	8	42407912	42407960	+	35	rs4641053	8	42352161	A	G	ILMN_1677385	1	-55751	1.14e-09	6.32e-06	0.129877	Y	Y	NA
RBP1	3	139237312	139237360	-	19	rs76298519	3	139278584	G	C	ILMN_1656837	1	-41224	1.14e-09	6.34e-06	0.641887	Y	Y	NA
NMNAT3	3	139279489	139279537	-	13	rs4389440	3	139437613	A	G	ILMN_1665123	1	-158076	1.16595e-09	6.44e-06	0.128889	Y	Y	NA
METTL5	2	170678469	170678517	-	24	rs35417312	2	170678476	A	G	ILMN_1691570	1	0	1.21482e-09	6.64e-06	-0.366824	Y	Y	NA
CAMKK2	12	121682980	121683028	-	4	rs3794205	12	121686929	A	G	ILMN_1743021	1	-3901	1.26746e-09	6.72e-06	0.185292	Y	Y	Type 2 diabetes
HMBOX1	8	28909122	28909170	+	2	rs10090426	8	29009974	T	C	ILMN_1720059	1	100804	1.27e-09	6.72e-06	-0.228927	N	NA	NA
SH3RF1	4	170016142	170016190	-	43	rs4072953	4	170030756	C	G	ILMN_1656826	1	-14566	1.29075e-09	6.83e-06	0.20314	Y	Y	NA
MTRR	5	7869223	7869271	+	6	rs139914610	5	7148679	T	C	ILMN_1702684	2	-720544	1.29336e-09	6.84e-06	0.204551	N	NA	NA
DCXR	17	79993778	79993826	-	32	rs28755469	17	79993696	A	G	ILMN_1681437	1	82	1.34733e-09	7.09e-06	0.163342	Y	Y	NA
RASIP1	19	49223963	49224011	-	34	rs11666792	19	49227043	A	G	ILMN_1755657	1	-3032	1.53e-09	7.84e-06	0.205728	Y	Y	NA
CCNG1	5	162871658	162871706	+	4	rs9790999	5	162888218	C	A	ILMN_1694491	1	16512	1.5664e-09	8.01e-06	0.246875	Y	Y	NA
PPP2R1B	11	111613336	111613384	-	11	rs10891290	11	111605215	C	T	ILMN_1704656	2	3517	1.6e-09	8.14e-06	-0.171009	Y	Y	NA
TRIM5	11	5685612	5685660	-	6	rs59814799	11	5683880	C	A	ILMN_1704972	1	1732	1.60971e-09	8.2e-06	-0.292982	N	NA	NA
CBR3	21	37518628	37518676	+	34	rs13046907	21	37526162	T	G	ILMN_1652237	1	7486	1.61e-09	8.21e-06	-0.218919	Y	Y	NA
NCAPD2	12	6640572	6640620	+	57	rs740850	12	6638116	T	C	ILMN_1775008	1	-2456	1.65026e-09	8.4e-06	0.211614	Y	Y	NA
BHMT	5	78427781	78427829	+	1	rs11959628	5	78582833	T	C	ILMN_1656638	1	155004	1.68184e-09	8.56e-06	0.192619	Y	Y	NA
MARCH2	19	8503306	8503354	+	1	rs34099346	19	8503345	C	G	ILMN_1669592	2	0	1.73e-09	8.78e-06	-0.212605	Y	Y	NA
CXCL9	4	76923068	76923116	-	7	rs182077788	4	76740730	T	G	ILMN_1745356	1	182338	1.75891e-09	8.94e-06	0.692658	N	NA	NA
C18ORF10/TPGS2	18	34376578	34376626	-	4	rs948636	18	34361762	C	G	ILMN_1671693	1	14816	1.8e-09	9.14e-06	-0.179869	Y	Y	NA
SPIRE1	18	12446590	12446638	-	57	rs57010148	18	12515912	A	C	ILMN_1757845	1	-69274	1.92108e-09	9.6e-06	0.119388	Y	Y	NA
AFAP1	4	7760464	7760512	-	3	rs11733177	4	7931249	T	C	ILMN_1701998	1	-170737	1.96279e-09	9.74e-06	0.195697	Y	Y	NA
PPP1CC	12	111157898	111157946	-	71	rs73194023	12	111137940	A	G	ILMN_1701855	1	19958	2.04e-09	1.01e-05	0.156263	Y	N	NA
C10ORF59/RNLS	10	90044871	90044919	-	5	rs2576159	10	90296467	T	A	ILMN_1718520	2	-251548	2.11584e-09	1.04e-05	0.21986	Y	Y	NA
LOC653381	15	45366949	45366997	-	30	rs71405285	15	45281944	T	C	ILMN_1692517	1	85005	2.27e-09	1.12e-05	0.233493	Y	N	NA
SAMSN1	21	15858321	15858369	-	2	rs79903723	21	15992464	T	C	ILMN_1684887	1	-134095	2.30767e-09	1.13e-05	0.232637	N	NA	NA
KRT25	17	38904479	38904527	-	2	rs139997967	17	38997617	G	T	ILMN_1704497	1	-93090	2.42859e-09	1.18e-05	-0.871307	N	NA	NA
FOXRED1	11	126147879	126147927	+	3	rs12293354	11	126093098	A	G	ILMN_1762312	1	-54781	2.44e-09	1.19e-05	-0.143942	Y	Y	NA
CNTN6	3	1444111	1444159	+	1	rs116714282	3	1235002	C	G	ILMN_1699317	1	-209109	2.44724e-09	1.19e-05	0.424688	N	NA	NA
KDELR3	22	38879050	38879098	+	5	rs8141562	22	38838730	A	G	ILMN_1722820	2	-38596	2.57e-09	1.25e-05	-0.19002	Y	Y	NA
NUP88	17	5290039	5290087	-	135	rs1071705	17	5290033	C	T	ILMN_1734826	1	6	2.60926e-09	1.25e-05	-0.0894462	Y	Y	NA
GLO1	6	38644163	38644211	-	3	rs72849921	6	38750542	A	G	ILMN_1702177	1	-106331	2.62814e-09	1.26e-05	0.159638	Y	Y	NA
C12ORF43	12	121441325	121441373	-	2	rs2258043	12	121451425	C	T	ILMN_1737818	1	-10052	2.79e-09	1.33e-05	0.131031	Y	Y	NA
TOMM7	7	22852704	22852752	-	11	rs1054471	7	22852643	A	T	ILMN_1674069	1	61	2.8691e-09	1.37e-05	-0.0837756	Y	Y	NA
BCAS1	20	52561380	52561428	-	7	rs290440	20	52683802	G	C	ILMN_1733042	1	-122374	2.95011e-09	1.4e-05	0.331916	Y	Y	NA
CMTM7	3	32490960	32491008	+	64	rs347126	3	32450413	A	T	ILMN_1698934	2	-40547	3.05563e-09	1.44e-05	0.130248	Y	Y	NA
FAM57A	17	645804	645852	+	7	rs2295480	17	636947	G	T	ILMN_1673899	1	-8857	3.16e-09	1.49e-05	0.20743	Y	Y	NA
ZNF586	19	58291865	58291913	+	2	rs61497125	19	58251497	A	G	ILMN_1666727	1	-40368	3.24119e-09	1.52e-05	0.178286	Y	Y	NA
TRIM47	17	73870443	73870491	-	1	rs1055129	17	73872948	G	A	ILMN_1712708	1	-2457	3.43274e-09	1.58e-05	-0.185291	Y	Y	White matter hyperintensity burden
USF1	1	161009201	161009249	-	2	rs114480413	1	160953380	A	T	ILMN_1777982	1	55821	3.5761e-09	1.63e-05	1.10924	N	NA	NA
LOC389293	9	88880974	88881022	-	5	rs140163715	9	88802361	G	A	ILMN_1675421	1	78613	3.67e-09	1.67e-05	-0.636806	N	NA	NA
NAGK	2	71305607	71305655	+	1	rs2160783	2	71283467	G	A	ILMN_1716547	1	-22140	3.67e-09	1.67e-05	-0.109262	Y	Y	NA
ATG16L1	2	234204127	234204175	+	2	rs56948044	2	234205313	A	G	ILMN_1725707	1	1138	3.70566e-09	1.69e-05	0.137753	N	NA	NA
OMD	9	95176882	95176930	-	24	rs76439349	9	94337386	C	T	ILMN_1749846	1	839496	3.77e-09	1.71e-05	0.198523	N	NA	NA
PON3	7	94989340	94989388	-	9	rs1989921	7	94985225	T	C	ILMN_1701007	1	4115	3.90491e-09	1.76e-05	-0.278911	Y	N	NA
LOC728760	17	39134479	39134527	+	17	rs7207813	17	39113606	G	A	ILMN_1658563	2	-20363	3.95e-09	1.78e-05	-0.531434	Y	N	NA
TMEM61	1	55457656	55457704	+	2	rs190785192	1	56423639	G	A	ILMN_1667115	1	965935	4.06e-09	1.81e-05	0.347539	N	NA	NA
LRSAM1	9	130214136	130214184	+	1	rs143429699	9	130771834	G	C	ILMN_1774856	2	557892	4.21e-09	1.87e-05	0.184941	N	NA	NA
SLC26A5	7	103050894	103050942	-	2	rs138198612	7	103612592	A	G	ILMN_1757958	2	-597849	4.51e-09	1.99e-05	0.243837	N	NA	NA
FEZ2	2	36779557	36779605	-	60	rs2110986	2	36804789	C	T	ILMN_1739586	1	-25184	4.63659e-09	2.03e-05	0.110227	Y	Y	NA
PLCD1	3	38049298	38049346	-	20	rs11711336	3	38026584	T	G	ILMN_1769394	1	22714	4.91e-09	2.13e-05	0.175639	Y	N	NA
CPEB2	4	15008962	15009010	+	2	rs144191740	4	15448385	C	T	ILMN_1774948	1	439375	4.93e-09	2.13e-05	0.35053	N	NA	NA
SH2D3C	9	130500836	130500884	-	1	rs182889705	9	131305406	T	C	ILMN_1775734	2	-804522	4.99e-09	2.16e-05	0.24415	N	NA	NA
OR10G2	14	22102282	22102330	-	1	rs79386214	14	22042093	G	A	ILMN_1748349	1	60189	5.18e-09	2.24e-05	0.142329	N	NA	NA
FAM158A	14	24608192	24608240	-	4	rs11158563	14	24604401	A	C	ILMN_1755677	1	3791	5.22e-09	2.26e-05	-0.181985	N	NA	NA
DAOA	13	106143305	106143353	+	2	rs145570483	13	105578966	T	C	ILMN_1658386	1	-564339	5.42072e-09	2.33e-05	0.178112	N	NA	NA
XKR6	8	11058104	11058152	-	5	rs36089015	8	10975301	A	T	ILMN_1724762	3	-221308	5.43e-09	2.33e-05	0.0958973	Y	N	NA
PKP1	1	201288955	201289003	+	4	rs1794870	1	201288515	T	G	ILMN_1663454	2	-440	5.57116e-09	2.39e-05	0.178583	Y	Y	NA
GFM1	3	158410223	158410271	+	132	rs73166376	3	157998207	A	G	ILMN_1657682	1	-412016	5.69e-09	2.44e-05	0.108662	Y	Y	NA
C19ORF48	19	51300968	51301016	-	10	rs10401588	19	51305287	G	A	ILMN_1759184	1	-4271	5.73875e-09	2.45e-05	0.123659	Y	Y	NA
OPA3	19	46031143	46031191	-	3	rs146680240	19	46274624	A	G	ILMN_1734762	3	-243433	5.77605e-09	2.46e-05	0.241063	N	NA	NA
C10ORF116/ADIRF	10	88730440	88730488	+	3	rs1873803	10	88724037	A	G	ILMN_1680110	1	-6403	5.80889e-09	2.47e-05	-0.217228	Y	Y	NA
CGI-96/RRP7A	22	42912040	42912088	+	7	rs5758765	22	42897414	C	A	ILMN_1656521	1	-14626	5.85e-09	2.49e-05	-0.203178	Y	Y	NA
CNTN3	3	74312426	74312474	-	1	rs183849469	3	75246167	T	A	ILMN_1717599	1	-933693	5.91766e-09	2.51e-05	0.267762	N	NA	NA
FGL2	7	76825769	76825817	-	10	rs28605947	7	76785507	C	A	ILMN_1693009	1	40262	5.92e-09	2.51e-05	-0.348199	Y	N	NA
TRIOBP	22	38170316	38170364	+	2	rs6000881	22	38154544	A	G	ILMN_1735788	1	-15772	6.07e-09	2.58e-05	0.164525	Y	Y	NA
C3ORF10/BRK1	3	10168727	10168775	+	50	rs56258042	3	10174295	T	C	ILMN_1764500	1	5520	6.36e-09	2.69e-05	-0.178637	Y	Y	NA
TMEM38B	9	108536273	108536321	+	6	rs7862873	9	108447753	C	T	ILMN_1669940	1	-88520	6.40969e-09	2.7e-05	0.125062	Y	Y	NA
TUSC1	9	25677387	25677435	-	6	rs10812299	9	25676895	C	T	ILMN_1707350	1	492	6.60118e-09	2.76e-05	-0.131202	Y	Y	NA
MAP2K6	17	67410988	67411036	+	1	rs12948375	17	67894028	A	G	ILMN_1697729	2	482992	6.66088e-09	2.77e-05	0.164694	N	NA	NA
CCBL2	1	89401693	89401741	-	39	rs12729558	1	89402960	G	C	ILMN_1778371	2	-1219	6.66288e-09	2.77e-05	-0.113097	Y	Y	NA
RARRES3	11	63313651	63313699	+	2	rs12803628	11	63274526	A	T	ILMN_1701613	1	-39125	6.79323e-09	2.82e-05	0.246248	Y	N	NA
C16ORF55/SPATA33	16	89737259	89737307	+	1	rs79025743	16	88889163	T	C	ILMN_1759261	1	-848096	6.94645e-09	2.88e-05	0.201775	N	NA	NA
PARM1	4	75974953	75975001	+	17	rs17000150	4	75974116	A	G	ILMN_1656560	1	-837	6.99288e-09	2.9e-05	-0.330975	Y	Y	NA
C22ORF29	22	19834045	19834093	-	8	rs7290770	22	19861161	T	C	ILMN_1759595	1	-27068	7.02136e-09	2.91e-05	-0.177524	Y	Y	NA
SMPD2	6	109764810	109764858	+	57	rs9480930	6	109652817	G	C	ILMN_1672176	1	-111993	7.22e-09	2.99e-05	0.144026	Y	Y	NA
GDE1	16	19513267	19513315	-	42	rs11860735	16	19526216	T	C	ILMN_1728698	1	-12901	7.86998e-09	3.22e-05	-0.314373	Y	Y	NA
TMX4	20	7962351	7962399	-	1	rs2205783	20	8000386	G	A	ILMN_1702759	1	-37987	7.89e-09	3.23e-05	0.177934	Y	Y	NA
SERPINB6	6	2948416	2948464	-	1	rs114089370	6	3621377	T	C	ILMN_1688814	2	-672913	7.89654e-09	3.23e-05	0.139238	N	NA	NA
NHP2L1	22	42070019	42070067	-	2	rs6002408	22	41967870	T	C	ILMN_1709809	3	102149	8.13991e-09	3.32e-05	0.241234	Y	Y	NA
OR7D2	19	9299298	9299346	+	4	rs116246092	19	9302143	G	A	ILMN_1722426	1	2797	8.19e-09	3.34e-05	0.0734402	Y	Y	NA
C8ORF55/THEM6	8	143818225	143818273	+	46	rs2978983	8	143765842	G	A	ILMN_1777740	1	-52383	8.24e-09	3.36e-05	-0.139964	Y	Y	NA
ENPEP	4	111482758	111482806	+	1	rs115619583	4	111213163	T	C	ILMN_1675325	1	-269595	8.31e-09	3.39e-05	0.237349	N	NA	NA
ST7L	1	113084483	113084531	-	1	rs60579835	1	113113194	T	C	ILMN_1659926	1	-28663	8.56e-09	3.45e-05	0.0913157	Y	Y	NA
PDCD2	6	170891166	170891214	-	32	rs12189695	6	170891043	T	A	ILMN_1758915	1	123	8.64509e-09	3.46e-05	-0.335869	Y	Y	NA
MED8	1	43850232	43850280	-	25	rs2842197	1	43927877	G	A	ILMN_1659537	1	-77597	8.87454e-09	3.54e-05	0.119481	Y	Y	NA
RAB31	18	9862307	9862355	+	1	rs34256602	18	9714192	A	G	ILMN_1660691	1	-148115	9.07115e-09	3.62e-05	-0.412308	N	NA	NA
RASGRP1	15	38780534	38780582	-	2	rs72727394	15	38847022	T	C	ILMN_1768958	1	-66440	9.29828e-09	3.69e-05	0.174989	Y	Y	Crohn's disease; Type 1 diabetes
C17ORF70/FAAP100	17	79506935	79506983	-	2	rs146507839	17	80462660	T	C	ILMN_1711823	1	-955677	9.39055e-09	3.73e-05	-0.575124	N	NA	NA
KCTD1	18	24034894	24034942	-	6	rs12454296	18	24048589	G	A	ILMN_1759984	1	-13647	9.41415e-09	3.74e-05	-0.446962	N	NA	NA
C14ORF132	14	96560017	96560065	+	4	rs8021066	14	96542363	A	C	ILMN_1713744	1	-17654	9.47e-09	3.76e-05	0.211927	Y	Y	NA
COL6A1	21	47424674	47424722	+	12	rs55641372	21	47322650	A	G	ILMN_1732151	1	-102024	1.02e-08	4e-05	-0.191432	Y	Y	NA
BET1	7	93623157	93623205	-	1	rs35582256	7	93641660	A	G	ILMN_1684042	1	-18455	1.04e-08	4.1e-05	-0.142363	Y	Y	NA
GRLF1	19	47503802	47503850	+	1	rs76831238	19	46754533	T	C	ILMN_1696845	3	-749269	1.12966e-08	4.38e-05	0.35566	N	NA	NA
CCT5	5	10266281	10266329	+	1	rs7722710	5	10246465	C	T	ILMN_1706246	1	-19816	1.19e-08	4.6e-05	-0.175714	Y	Y	NA
FAM46A	6	82459420	82459468	-	3	rs194624	6	82509902	A	G	ILMN_1740466	1	-50434	1.19e-08	4.6e-05	0.14428	Y	N	NA
EIF2AK2	2	37333732	37333780	-	8	rs11894414	2	37380627	T	C	ILMN_1706502	1	-46847	1.2e-08	4.63e-05	-0.164513	Y	Y	NA
TSN	2	122525320	122525368	+	1	rs190031067	2	123223357	G	A	ILMN_1768913	1	697989	1.20153e-08	4.62e-05	0.499206	N	NA	NA
MAD2L1BP	6	43608326	43608374	+	2	rs1617105	6	43613180	A	G	ILMN_1694711	1	4806	1.25154e-08	4.79e-05	0.154743	Y	Y	NA
ELAC2	17	12895999	12896047	-	6	rs10153245	17	12864158	G	A	ILMN_1718044	1	31841	1.27e-08	4.87e-05	-0.197088	N	NA	NA
S100A13	1	153598802	153598850	-	1	rs28754733	1	153598094	C	T	ILMN_1738707	3	708	1.2943e-08	4.94e-05	-0.158901	Y	Y	NA
KIF27	9	86504059	86504107	+	1	rs190296046	9	86707898	A	C	ILMN_1678810	3	-212626	1.34e-08	5.11e-05	0.346747	N	NA	NA
UQCC/UQCC1	20	33890457	33890505	-	13	rs2248393	20	33926103	G	C	ILMN_1745152	2	-35598	1.35e-08	5.15e-05	-0.101506	Y	Y	NA
TJP2	9	71869423	71869471	+	4	rs10781420	9	71724578	T	G	ILMN_1664978	2	-141503	1.37e-08	5.2e-05	-0.138659	NA	NA	NA
TIGD5	8	144682336	144682384	+	1	rs56949579	8	144646201	A	G	ILMN_1705774	1	-36135	1.38e-08	5.24e-05	-0.122603	Y	N	NA
NQO1	16	69743412	69743460	-	3	rs543566416	16	69291366	C	T	ILMN_1720282	1	452046	1.44e-08	5.42e-05	0.783003	N	NA	NA
ADSSL1	14	105196330	105196378	+	10	rs4983543	14	105212399	C	T	ILMN_1720235	2	16021	1.55101e-08	5.78e-05	-0.118029	Y	Y	NA
EFHA1	13	22067001	22067049	-	1	rs2025242	13	22078413	T	C	ILMN_1738346	1	-11364	1.552e-08	5.78e-05	-0.110854	Y	N	NA
SLC10A1	14	70242819	70242867	-	1	rs111429690	14	70562548	G	C	ILMN_1776112	1	-319681	1.58e-08	5.86e-05	0.18248	N	NA	NA
ATP2B4	1	203702480	203702528	+	1	rs41264257	1	203708772	T	C	ILMN_1664772	2	6244	1.62079e-08	6e-05	0.237331	N	NA	NA
SH3BP1	22	38051771	38051819	+	2	rs62236671	22	38069305	A	G	ILMN_1692539	1	17486	1.63e-08	6.05e-05	-0.155881	N	NA	NA
CAT	11	34492589	34492588	+	4	rs525938	11	34463593	C	T	ILMN_1651705	1	-28996	1.67e-08	6.16e-05	-0.220198	Y	Y	NA
HSPB6	19	36245533	36245581	-	1	rs147350620	19	35654478	A	G	ILMN_1721283	1	591055	1.73902e-08	6.39e-05	0.326129	N	NA	NA
C16ORF72	16	9213311	9213359	+	3	rs12149684	16	9180340	T	A	ILMN_1773407	1	-32971	1.75327e-08	6.44e-05	-0.149697	Y	N	NA
NMRAL1	16	4511778	4511826	-	10	rs73507284	16	4430173	G	C	ILMN_1709814	1	81605	1.77e-08	6.49e-05	-0.26063	Y	Y	NA
TRIP11	14	92436026	92436074	-	52	rs58339937	14	92506583	C	T	ILMN_1658144	1	-70509	1.79086e-08	6.56e-05	0.148432	Y	Y	NA
CPEB4	5	173384957	173385005	+	49	rs1976074	5	173384663	A	T	ILMN_1722025	1	-294	1.83844e-08	6.68e-05	0.237454	Y	Y	NA
KRT27	17	38933218	38933266	-	2	rs142075512	17	39309923	G	A	ILMN_1680828	1	-376657	1.84809e-08	6.71e-05	-0.758498	N	NA	NA
MRPL39	21	26976109	26976108	-	2	rs1631676	21	26920447	G	C	ILMN_1726391	2	39580	1.88e-08	6.83e-05	-0.109008	Y	Y	NA
BAX	19	49464448	49464496	+	18	rs3739198	19	50366042	A	G	ILMN_1683300	1	901546	1.93285e-08	6.99e-05	0.251272	Y	N	NA
HOXB5	17	46668692	46668740	-	1	rs117165478	17	46800309	A	C	ILMN_1674908	1	-131569	1.97439e-08	7.14e-05	0.297437	N	NA	NA
ZYG11B	1	53291255	53291303	+	30	rs521288	1	53273958	T	C	ILMN_1656676	1	-17297	2.0052e-08	7.23e-05	0.111458	Y	Y	NA
TFPI	2	188332604	188332652	-	31	rs116438717	2	188288259	A	G	ILMN_1707124	3	44345	2.08e-08	7.46e-05	0.156702	N	NA	NA
KLC3	19	45854221	45854269	+	1	rs10416418	19	45234105	G	A	ILMN_1702738	1	-620116	2.12331e-08	7.6e-05	-0.469543	N	NA	NA
ARHGDIB	12	15095032	15095080	-	1	rs2430722	12	15122111	C	T	ILMN_1678143	1	-27031	2.24e-08	7.89e-05	0.289208	Y	Y	NA
SLC5A10	17	18916704	18916752	+	6	rs76921635	17	18914725	A	G	ILMN_1691503	2	-1979	2.36261e-08	8.27e-05	-0.453034	N	NA	NA
SLC39A11	17	70642301	70642349	-	1	rs4329969	17	70872923	G	A	ILMN_1742705	1	-230574	2.36768e-08	8.29e-05	-0.120048	N	NA	NA
ZNF467	7	149461499	149461547	-	1	rs77028034	7	149471610	C	G	ILMN_1779015	1	-10063	2.45386e-08	8.51e-05	-0.34387	Y	Y	NA
MXRA7	17	74672116	74672164	-	6	rs144842738	17	74702279	A	G	ILMN_1743836	2	-30115	2.6e-08	8.88e-05	0.338553	Y	Y	NA
C10ORF33/PYROXD2	10	100143517	100143565	-	1	rs7075655	10	100142068	G	A	ILMN_1684497	1	1449	2.60654e-08	8.9e-05	0.0808646	Y	Y	NA
GAL3ST2	2	242743523	242743571	+	2	rs142786222	2	242153867	A	G	ILMN_1714478	1	-589656	2.643e-08	9.02e-05	0.194152	N	NA	NA
RCOR3	1	211489098	211489146	+	19	rs78357656	1	211284815	A	C	ILMN_1682095	1	-204283	2.68e-08	9.08e-05	0.124136	N	NA	NA
DUSP15	20	30458122	30458170	-	1	rs181181701	20	30614712	T	A	ILMN_1689000	2	-156968	2.79e-08	9.39e-05	0.240846	N	NA	NA
KRT74	12	52959785	52959833	-	1	rs560394442	12	53179901	G	A	ILMN_1713272	1	-220068	2.79343e-08	9.42e-05	-1.59866	N	NA	NA
ATPIF1	1	28562909	28562957	+	5	rs905908	1	28520161	T	C	ILMN_1685978	2	-42748	2.7951e-08	9.42e-05	-0.133515	Y	Y	NA
GPR109B	12	123200193	123200241	-	1	rs11057257	12	123796240	A	T	ILMN_1677693	1	-595999	2.90217e-08	9.75e-05	0.311476	N	NA	NA
SUPT5H	19	39966929	39966977	+	1	rs31727	19	39915637	A	G	ILMN_1703866	1	-51292	2.98826e-08	9.96e-05	-0.115266	Y	Y	NA

## Sheet: Suppl.Table.2
Suppl.Table.2 Enriched pathways for hair follicle eGenes.
Pathway name	Database	GeneSet	n	% from GeneSet	P	adjusted P	Genes
BILE ACID METABOLISM	Hallmark	112	8	7.14286	9.06e-07	4.53e-05	CAT, SLC27A2, PEX11A, IDH2, HSD3B7, RBP1, PEX6, EPHX2
XENOBIOTIC METABOLISM	Hallmark	200	10	5	2.46e-06	6.15e-05	CYP2J2, FMO1, CAT, NQO1, MPP2, DCXR, DDT, ENPEP, ETFDH, MARCH6
PEROXISOME	Hallmark	104	7	6.73077	5.11e-06	8.52e-05	CAT, SLC27A2, PEX11A, IDH2, HSD3B7, PEX6, EPHX2
MITOCHONDRIAL PROTEIN IMPORT	Reactome	51	5	9.80392	6.82e-06	0.00459	TIMM10, TIMM22, ATP5G1, TOMM7, SLC25A13
ESTROGEN RESPONSE LATE	Hallmark	200	9	4.5	1.62e-05	0.000162	CELSR2, ATP2B4, SLC27A2, IDH2, AMFR, RABEP1, DCXR, RAB31, CALCR
INTERFERON GAMMA RESPONSE	Hallmark	200	9	4.5	1.62e-05	0.000162	IFITM2, LYSMD2, BST2, EIF2AK2, CXCL9, HLA-DMA, ARL4A, FGL2, PARP12
INTERFERON ALPHA RESPONSE	Hallmark	97	6	6.18557	3.04e-05	0.000253	IFITM2, TRIM5, BST2, EIF2AK2, FAM46A, PARP12
WNT BETA CATENIN SIGNALING	Hallmark	42	4	9.52381	3.86e-05	0.000276	PSEN2, AXIN1, JAG1, JAG1, HEY2
HEME METABOLISM	Hallmark	200	8	4	9.67e-05	0.000537	CAT, UCP2, HBQ1, HAGH, GDE1, MARCH2, H1F0, SLC25A37
OXIDATIVE PHOSPHORYLATION	Hallmark	200	8	4	9.67e-05	0.000537	TIMM10, ISCU, IDH2, ATP5G1, BAX, ETFDH, MTRR, NQO2
BILE ACID AND BILE SALT METABOLISM	Reactome	27	3	11.1111	9.92e-05	0.0111	SLC10A1, SLC27A2, HSD3B7
APOPTOTIC EXECUTION PHASE	Reactome	52	4	7.69231	0.000109	0.0111	PKP1, H1F0, HIST1H1E, TJP2
SIGNAL AMPLIFICATION	Reactome	31	3	9.67742	0.000173	0.0111	GNAI3, GNA15, GNA14
TRANSPORT OF MATURE MRNA DERIVED FROM AN INTRONLESS TRANSCRIPT	Reactome	33	3	9.09091	0.000222	0.0113	NUP88, NUP43, CPSF1
IMMUNE SYSTEM	Reactome	900	19	2.11111	0.000244	0.0113	SEC61A2, IFITM2, PPP2R1B, RASGRP1, NUP88, UBE2Z, MAP2K6, CFD, KLC3, EIF2AK2, IL1A, UBE2L3, UBA6, PJA2, HLA-DMA, NUP43, DEFB1, KLHL9, LRSAM1
APOPTOSIS	Reactome	143	6	4.1958	0.000347	0.0137	PKP1, UNC5B, BAX, H1F0, HIST1H1E, TJP2
ADIPOGENESIS	Hallmark	200	7	3.5	0.000517	0.00185	CD151, CAT, UCP2, DDT, ARL4A, EPHX2, OMD
ESTROGEN RESPONSE EARLY	Hallmark	200	7	3.5	0.000517	0.00185	CELSR2, RASGRP1, SLC27A2, PEX11A, AMFR, RAB31, CALCR
GLYCOLYSIS	Hallmark	200	7	3.5	0.000517	0.00185	LDHC, PYGB, KDELR3, PLOD2, GLRX, SLC25A13, GNE
INFLAMMATORY RESPONSE	Hallmark	200	7	3.5	0.000517	0.00185	GNAI3, RASGRP1, GNA15, BST2, EIF2AK2, IL1A, CXCL9
MTORC1 SIGNALING	Hallmark	200	7	3.5	0.000517	0.00185	ATP5G1, PSMG1, PLOD2, GLRX, CCNG1, FGL2, INSIG1
MRNA PROCESSING	Reactome	158	6	3.79747	0.00063	0.0207	POLR2L, NUP88, SUPT5H, NHP2L1, NUP43, CPSF1
TRANSCRIPTION COUPLED NER TC NER	Reactome	44	3	6.81818	0.000679	0.0208	POLR2L, POLE, RPA3
APOPTOSIS	Hallmark	161	6	3.72671	0.000704	0.00235	PSEN2, GNA15, BAX, SLC20A1, IL1A, H1F0
TCA CYCLE AND RESPIRATORY ELECTRON TRANSPORT	Reactome	120	5	4.16667	0.00082	0.024	NDUFS5, UCP2, IDH2, ATP5G1, ETFDH
METABOLISM OF PROTEINS	Reactome	448	11	2.45536	0.000897	0.0248	SEC61A2, TIMM10, EIF2B2, TIMM22, ATP5G1, PIGN, PIGP, CCT5, TOMM7, SLC25A13, GALNT11
RESPIRATORY ELECTRON TRANSPORT ATP SYNTHESIS BY CHEMIOSMOTIC COUPLING AND HEAT PRODUCTION BY UNCOUPLING PROTEINS	Reactome	82	4	4.87805	0.000921	0.0248	NDUFS5, UCP2, ATP5G1, ETFDH
MITOTIC M M G1 PHASES	Reactome	170	6	3.52941	0.000969	0.0251	PPP2R1B, PPP1CC, POLE, MAPRE1, NUP43, RPA3
REACTIVE OXIGEN SPECIES PATHWAY	Hallmark	49	3	6.12245	0.00102	0.0032	CAT, NQO1, GLRX
NUCLEOTIDE EXCISION REPAIR	Reactome	49	3	6.12245	0.00102	0.0255	POLR2L, POLE, RPA3
EXTRACELLULAR MATRIX ORGANIZATION	Reactome	86	4	4.65116	0.00114	0.0258	MMP10, MMP1, COL6A1, PLOD2
MITOTIC PROMETAPHASE	Reactome	87	4	4.5977	0.0012	0.0261	PPP2R1B, PPP1CC, MAPRE1, NUP43
TRANSPORT OF MATURE TRANSCRIPT TO CYTOPLASM	Reactome	54	3	5.55556	0.00147	0.0296	NUP88, NUP43, CPSF1
SPERMATOGENESIS	Hallmark	135	5	3.7037	0.00151	0.00443	LDHC, PEBP1, TSN, PSMG1, ARL4A
COAGULATION	Hallmark	137	5	3.64964	0.00162	0.00451	S100A13, MMP10, MMP1, ISCU, CFD
CLASS I MHC MEDIATED ANTIGEN PROCESSING PRESENTATION	Reactome	239	7	2.92887	0.00163	0.0296	SEC61A2, UBE2Z, UBE2L3, UBA6, PJA2, KLHL9, LRSAM1
PROCESSING OF CAPPED INTRON CONTAINING PRE MRNA	Reactome	138	5	3.62319	0.00168	0.0296	POLR2L, NUP88, NHP2L1, NUP43, CPSF1
DNA REPLICATION	Reactome	190	6	3.15789	0.00184	0.0296	PPP2R1B, PPP1CC, POLE, MAPRE1, NUP43, RPA3
ANDROGEN RESPONSE	Hallmark	100	4	4	0.00223	0.00563	GNAI3, CAMKK2, H1F0, INSIG1
LATE PHASE OF HIV LIFE CYCLE	Reactome	101	4	3.9604	0.00232	0.0348	POLR2L, NUP88, SUPT5H, NUP43
E2F TARGETS	Hallmark	200	6	3	0.00245	0.00563	NCAPD2, POLE, UBR7, RAD51C, POLE4, RPA3
P53 PATHWAY	Hallmark	200	6	3	0.00245	0.00563	ISCU, RAD51C, DCXR, BAX, IL1A, CCNG1
DNA REPAIR	Hallmark	149	5	3.3557	0.00248	0.00563	TAF1C, SUPT5H, POLE4, RPA3, POLB
ANTIGEN PROCESSING UBIQUITINATION PROTEASOME DEGRADATION	Reactome	201	6	2.98507	0.00252	0.0365	UBE2Z, UBE2L3, UBA6, PJA2, KLHL9, LRSAM1
ADAPTIVE IMMUNE SYSTEM	Reactome	514	11	2.14008	0.00281	0.0365	SEC61A2, PPP2R1B, RASGRP1, UBE2Z, KLC3, UBE2L3, UBA6, PJA2, HLA-DMA, KLHL9, LRSAM1
DNA REPAIR	Reactome	106	4	3.77358	0.00287	0.0365	POLR2L, POLE, RPA3, POLB
ANTIVIRAL MECHANISM BY IFN STIMULATED GENES	Reactome	65	3	4.61538	0.00292	0.0365	NUP88, EIF2AK2, NUP43
GLUCOSE METABOLISM	Reactome	66	3	4.54545	0.00309	0.0365	PPP2R1B, PYGB, SLC25A13
HEMOSTASIS	Reactome	453	10	2.20751	0.0031	0.0365	GNAI3, MMP1, PPP2R1B, RASGRP1, RAD51C, CFD, GNA15, KLC3, TFPI, GNA14
SIGNALING BY NOTCH1	Reactome	68	3	4.41176	0.00344	0.0365	PSEN2, JAG1, JAG1, HEY2
METABOLISM OF LIPIDS AND LIPOPROTEINS	Reactome	472	10	2.11864	0.00421	0.0385	MED8, HSD17B12, PPP1CC, SLC10A1, SLC27A2, PEX11A, HSD3B7, CRLS1, LSS, SMPD2
HIV LIFE CYCLE	Reactome	116	4	3.44828	0.00422	0.0385	POLR2L, NUP88, SUPT5H, NUP43
METABOLISM OF NUCLEOTIDES	Reactome	72	3	4.16667	0.00422	0.0385	CAT, ADSSL1, GLRX
INTEGRATION OF ENERGY METABOLISM	Reactome	118	4	3.38983	0.00453	0.04	PPP2R1B, GNA15, ADCY3, GNA14
CHOLESTEROL HOMEOSTASIS	Hallmark	74	3	4.05405	0.00466	0.0097	JAG1, JAG1, LSS, CPEB2
TELOMERE MAINTENANCE	Reactome	74	3	4.05405	0.00466	0.04	POLE, HIST1H4E, RPA3
OPIOID SIGNALLING	Reactome	77	3	3.8961	0.00536	0.0411	GNAI3, PPP2R1B, ADCY3
METABOLISM OF CARBOHYDRATES	Reactome	239	6	2.51046	0.00645	0.0476	PPP2R1B, NUP88, PYGB, NUP43, SLC25A13, OMD
MEIOTIC RECOMBINATION	Reactome	83	3	3.61446	0.00698	0.0476	RAD51C, HIST1H4E, RPA3
EPITHELIAL MESENCHYMAL TRANSITION	Hallmark	199	5	2.51256	0.00993	0.0188	GPX7, MMP1, MGP, GREM1, PLOD2
HYPOXIA	Hallmark	200	5	2.5	0.0102	0.0188	PKP1, LDHC, NAGK, KDELR3, GLRX
FATTY ACID METABOLISM	Hallmark	158	4	2.53165	0.0149	0.0257	CRYZ, FMO1, CBR3, ETFDH
PI3K AKT MTOR SIGNALING	Hallmark	105	3	2.85714	0.0156	0.0259	PPP2R1B, MAP2K6, GNA14

## Sheet: Suppl.Table.3
Suppl.Table.3	Replicated hair follicle eQTLs. Best eSNP per gene.
Hair follicle eQTL								Discovery sample (n=98)				Replication sample (n=25)
Gene	Effect	#Replicated	Best SNP	Chr	Position	A1	A2	Probe	Pval	FDR	Slope	Probe	Pval	FDR	Slope
PARP12	+	22	rs2286197	7	139726467	G	A	ILMN_1718558	1.19e-23	3.46e-18	0.340185	ILMN_1718558	0.000339455	0.383434	0.304727
BCR	+	9	rs201686347	22	23653210	C	G	ILMN_1670398	6.23e-23	1.36e-17	0.444527	ILMN_1670398	0.00393986	0.691086	0.312513
RPS26L	+	4	rs773125	12	56394954	G	A	ILMN_1695585	1.14e-22	2.12e-17	0.438637	ILMN_1695585	0.000340751	0.384284	0.325711
KDELR2	-	4	rs2347784	7	6524843	G	C	ILMN_1724293	4.8e-21	5.46e-16	-0.258312	ILMN_1724293	0.000941387	0.465543	-0.240607
FAHD1	+	2	rs2999969	16	1916720	A	G	ILMN_1701457	2.58e-20	1.71e-15	0.618964	ILMN_2246661	0.00181726	0.590242	0.319856
SLC47A2	+	2	rs8073794	17	19627229	A	C	ILMN_1693912	8.54e-20	4.97e-15	0.743543	ILMN_1693912	0.000670942	0.476967	0.627855
ATP5MD	+	2	rs7477753	10	105025011	A	G	ILMN_1773313	6.48e-18	2.37e-13	0.995271	ILMN_1773313	1.87e-05	0.151509	0.930881
SH3YL1	-	4	rs10193373	2	281886	G	T	ILMN_1712231	1.03e-17	3.64e-13	-0.486525	ILMN_1712231	0.00266058	0.635316	-0.217833
ADCY3	-	2	rs6718511	2	25122324	G	A	ILMN_1676893	2.27e-17	7.49e-13	-0.269547	ILMN_1676893	0.0092675	0.757968	-0.185436
CPNE1	-	2	rs2425104	20	34312346	A	C	ILMN_1670841	6.18e-17	1.77e-12	-0.499255	ILMN_1670841	0.00515506	0.670529	-0.189023
PPIL3	-	4	rs6713233	2	201819627	A	G	ILMN_1770020	5.25e-16	1.25e-11	-0.36186	ILMN_1770020	0.000550627	0.44151	-0.3123
GSTT1	-	7	rs7289655	22	24335228	C	A	ILMN_1730054	4.23e-15	7.47e-11	-1.29198	ILMN_1730054	0.00676168	0.774449	-0.587807
GSDMD	-	1	rs13255282	8	144643815	C	G	ILMN_1665428	7.11e-15	1.23e-10	-0.26268	ILMN_1665428	0.00139752	0.505779	-0.199159
POLE	-	3	rs11147017	12	133298215	A	C	ILMN_1728199	1.3e-14	2.2e-10	-0.235985	ILMN_1728199	0.00434198	0.643942	-0.200673
CDK5RAP2	-	2	rs10984915	9	123205583	T	G	ILMN_1655990	3.06e-14	4.85e-10	-0.376482	ILMN_1655990	0.00237354	0.616494	-0.623526
KRT6C	-	2	rs67173992	12	52878910	A	G	ILMN_1754576	4.8e-14	7.14e-10	-1.28467	ILMN_1754576	0.000172827	0.302441	-1.33095
DDT	-	4	rs7289655	22	24335228	C	A	ILMN_1690982	6.02e-14	8.79e-10	-0.186837	ILMN_1690982	0.00657347	0.77053	-0.13164
SNAP29	-	2	rs5761520	22	21312889	T	C	ILMN_1659857	6.55e-14	9.4e-10	-0.440491	ILMN_1659857	0.00476403	0.658131	-0.347095
CALCR	+	2	rs17165636	7	93263513	C	A	ILMN_1710219	9.11e-14	1.22e-09	0.265453	ILMN_1710219	0.00306411	0.659814	0.131538
KCTD10	+	7	rs200794116	12	109926207	G	A	ILMN_1719064	9.32e-14	1.22e-09	0.519726	ILMN_1719064	0.00241289	0.619333	0.394442
RPF2	-	1	rs35564989	6	111367124	G	T	ILMN_1664167	5.21e-13	5.93e-09	-0.224648	ILMN_1664167	0.00779897	0.738349	-0.13706
PSMG1	-	4	rs419469	21	40537234	T	C	ILMN_1659285	5.83e-13	6.37e-09	-0.307032	ILMN_1659285	0.000795473	0.503971	-0.18856
RABEP1	+	2	rs79841477	17	5303460	A	T	ILMN_1719622	8.36e-13	8.84e-09	0.32562	ILMN_1719622	0.00192779	0.595928	0.22281
RNPEP	-	1	rs6702229	1	201954768	G	T	ILMN_1738347	3.81e-12	3.74e-08	-0.206741	ILMN_1738347	0.00288509	0.648559	-0.147467
HBQ1	+	7	rs549518637	16	236041	T	G	ILMN_1696183	4.53e-12	4.37e-08	0.256796	ILMN_1696183	0.00806949	0.79953	0.186468
C5ORF13	+	2	rs201376143	5	110914228	A	T	ILMN_1680738	6.21e-12	5.86e-08	0.281858	ILMN_1680738	0.00308456	0.66107	0.28776
C3ORF54	+	1	rs60198058	3	49869925	A	G	ILMN_1690454	6.31e-12	5.96e-08	0.187119	ILMN_1690454	0.00390903	0.688367	0.123911
LDHC	+	6	rs4757658	11	18433201	T	A	ILMN_1745043	6.76e-12	6.33e-08	0.177804	ILMN_2326324	0.000129732	0.277582	0.215696
RPA3	+	15	rs12114002	7	7510487	C	T	ILMN_1716895	7.99e-12	7.37e-08	0.279994	ILMN_1716895	0.00146663	0.568635	0.389638
POLR2L	-	2	rs72847212	11	834389	C	T	ILMN_1670037	9.38e-12	8.64e-08	-0.315774	ILMN_1670037	0.00216364	0.561946	-0.220895
LOC339804	-	2	rs12995264	2	61583614	G	A	ILMN_1754501	9.92e-12	9.12e-08	-0.341741	ILMN_1754501	0.000261351	0.3316	-0.298753
PYGB	-	2	rs12481409	20	25436466	T	C	ILMN_1778360	1.24e-11	1.12e-07	-0.44938	ILMN_1778360	0.000435773	0.41411	-0.450011
TMEM63A	-	2	rs360061	1	226038614	T	A	ILMN_1719649	1.33e-11	1.19e-07	-0.209883	ILMN_1719649	0.0037092	0.681908	-0.293223
KIAA0892	-	1	rs7250368	19	19452763	A	G	ILMN_1685631	1.76e-11	1.53e-07	-0.191963	ILMN_1685631	0.00261748	0.63453	-0.181022
CWF19L1	+	2	rs1823624	10	101969852	A	T	ILMN_1651886	4.78e-11	3.77e-07	0.146958	ILMN_1651886	0.00549344	0.734725	0.125756
SPAG7	+	2	rs57245298	17	4930509	G	C	ILMN_1684446	4.98e-11	3.91e-07	0.27693	ILMN_1684446	2.34e-06	0.0643409	0.35275
ERP27	-	3	rs7138174	12	15065323	A	C	ILMN_1655261	5.68e-11	4.39e-07	-0.539027	ILMN_1655261	0.000553277	0.441692	-0.627617
HAGH	+	4	rs7202283	16	1910015	G	C	ILMN_1772731	6.39e-11	4.82e-07	0.186182	ILMN_2379520	0.00128551	0.561887	0.324167
PIGN	-	1	rs56137324	18	59706893	A	G	ILMN_1691112	6.61e-11	4.96e-07	-0.264861	ILMN_1691112	0.00622867	0.69418	-0.134304
MCOLN2	-	2	rs532185	1	85440793	A	G	ILMN_1660462	9.43e-11	6.9e-07	-0.203966	ILMN_1660462	0.00412537	0.695442	-0.26306
ZRANB1	+	7	rs75919476	10	126653022	A	C	ILMN_1757742	1.08e-10	7.87e-07	0.355605	ILMN_1757742	0.00570957	0.684864	0.0992775
ATP6V0A4	-	1	rs56239274	7	138387121	T	C	ILMN_1678186	1.11e-10	7.98e-07	-0.311436	ILMN_1678186	0.00486281	0.719596	-0.205682
MGP	-	15	rs1800802	12	15038919	G	A	ILMN_1651958	1.16e-10	8.33e-07	-0.477336	ILMN_2071809	0.00105491	0.543943	-0.463736
ISCU	+	2	rs10187	12	108962804	T	C	ILMN_1735432	1.68e-10	1.17e-06	0.32453	ILMN_2409062	0.00144792	0.568635	0.160511
CYP2J2	+	1	rs35441391	1	60257776	T	C	ILMN_1758731	3.73e-10	2.38e-06	0.344809	ILMN_1758731	0.00923394	0.814112	0.202856
PPP2R3C	+	1	rs77772792	14	35520127	G	C	ILMN_1662617	3.8e-10	2.42e-06	0.162737	ILMN_1662617	0.00508595	0.668623	0.156164
EHD4	-	2	rs192403647	15	42219214	A	C	ILMN_1720083	3.97e-10	2.51e-06	-0.589692	ILMN_1720083	0.000261872	0.359607	-0.670127
MAPRE1	+	5	rs6087992	20	31354935	C	T	ILMN_1777721	4.09e-10	2.58e-06	0.130845	ILMN_1777721	0.00176213	0.53281	0.14014
CRYZ	+	2	rs277380	1	75263088	C	T	ILMN_1672389	4.34e-10	2.72e-06	0.35145	ILMN_1672389	1.42e-05	0.12664	0.398049
GLRX	+	2	rs60682160	5	95156318	G	C	ILMN_1737308	5.17e-10	3.14e-06	0.412332	ILMN_1737308	0.0072567	0.782873	0.349532
SMAP1	+	7	rs112871254	6	71363496	T	C	ILMN_1768271	5.67e-10	3.41e-06	0.361157	ILMN_1768271	0.000597782	0.451648	0.27133
JAG1	+	1	rs6077861	20	10624926	T	A	ILMN_1691376	7.07e-10	4.15e-06	0.150142	ILMN_1691376	0.00153971	0.576415	0.0925682
SNX29	-	18	rs12162092	16	12652801	A	G	ILMN_1659761	1.14e-09	6.34e-06	-0.267143	ILMN_1659761	0.0080383	0.798423	-0.177216
STK36	+	1	rs2195088	2	219657838	G	A	ILMN_1693538	1.24e-09	6.67e-06	0.174972	ILMN_1693538	0.00779383	0.793799	0.0902413
MAP6D1	+	2	rs17622152	3	183520112	A	G	ILMN_1688464	1.33e-09	7.01e-06	0.198643	ILMN_1688464	0.000351573	0.390202	0.211742
CPSF1	-	3	rs1971250	8	145627795	C	T	ILMN_1654545	3.37e-09	1.57e-05	-0.142049	ILMN_1654545	0.000230034	0.335961	-0.244295
LOC389293	-	9	rs143116664	9	88929594	G	C	ILMN_1675421	3.67e-09	1.67e-05	-0.636806	ILMN_1675421	0.0007932	0.503355	-0.393439
TMEM80	-	2	rs12796576	11	668974	C	T	ILMN_1689868	4.57e-09	2.01e-05	-0.141972	ILMN_1708482	0.00438016	0.703625	-0.145927
LRP11	+	4	rs12174035	6	150084447	T	A	ILMN_1676197	4.84e-09	2.1e-05	0.160519	ILMN_1676197	0.00626425	0.76107	0.134222
PEX11A	+	2	rs8179045	15	90223143	A	G	ILMN_1690695	6.36e-09	2.69e-05	0.19166	ILMN_1690695	0.00939837	0.760433	0.141701
GDE1	-	1	rs11863849	16	19563823	A	G	ILMN_1728698	7.87e-09	3.22e-05	-0.314373	ILMN_1728698	0.00935683	0.816212	-0.236086
CBR3	-	1	rs34285668	21	37511075	C	G	ILMN_1652237	8.6e-09	3.46e-05	-0.206466	ILMN_1652237	0.00935759	0.759908	-0.117496
NAPRT1	-	2	rs13255282	8	144643815	T	G	ILMN_1710752	9.05e-09	3.61e-05	-0.426582	ILMN_1710752	0.00407074	0.695029	-0.308243
KCTD1	-	5	rs146191653	18	24049257	A	G	ILMN_1759984	9.41e-09	3.74e-05	-0.446962	ILMN_1759984	0.00261112	0.63453	-0.282032
GSTO2	+	1	rs71496567	10	106117603	A	G	ILMN_1740234	1.05e-08	4.12e-05	0.132669	ILMN_1740234	0.00970644	0.818726	0.0679734
SLC25A37	-	2	rs2942195	8	23422454	C	G	ILMN_1715969	2.07e-08	7.46e-05	-0.17968	ILMN_1715969	0.00978451	0.820087	-0.254465
ZNF467	-	1	rs77028034	7	149471610	C	G	ILMN_1779015	2.45e-08	8.51e-05	-0.34387	ILMN_1779015	0.00162467	0.578853	-0.750119
SPG21	-	6	rs111063813	15	65245276	T	C	ILMN_1657423	2.62e-08	8.94e-05	-0.121049	ILMN_1733560	0.00262526	0.63453	-0.147925

## Sheet: Suppl.Table.4
Suppl.Table.4		Differential hair follicle eQTLs between frontal and occipital scalp areas.
Frontal scalp eQTLs										Occipital scalp eQTLs
eGene	Effect	eSNP	CHR	BP	A1	A2	Probe	P	FDR	eGene	Effect	eSNP	CHR	BP	A1	A2	Probe	P	FDR
GLUL	+	rs188754390	1	182546080	C	T	ILMN_1653496	1.27e-05	0.125724	SMG7	-	rs188754390	1	182546080	C	T	ILMN_1706553	4.55e-06	0.0736525
GLUL	+	rs35124754	1	182742085	A	G	ILMN_1653496	1.27e-05	0.125724	SMG7	-	rs35124754	1	182742085	A	G	ILMN_1706553	4.55e-06	0.0736525
ATP2B4	+	rs191896399	1	203229672	A	G	ILMN_1664772	2.13e-05	0.158221	SYT2	+	rs191896399	1	203229672	A	G	ILMN_3183806	1.95e-06	0.0565594
ATP2B4	+	rs148452971	1	203285228	A	G	ILMN_1664772	2.13e-05	0.158221	SYT2	+	rs148452971	1	203285228	A	G	ILMN_3183806	1.95e-06	0.0565594
ATP2B4	+	rs114183053	1	203298030	T	C	ILMN_1664772	2.13e-05	0.158221	SYT2	+	rs114183053	1	203298030	T	C	ILMN_3183806	1.95e-06	0.0565594
ATP2B4	+	rs74779206	1	203320507	A	G	ILMN_1664772	2.13e-05	0.158221	SYT2	+	rs74779206	1	203320507	A	G	ILMN_3183806	1.95e-06	0.0565594
ATP2B4	+	rs115396054	1	203443026	A	G	ILMN_1664772	2.13e-05	0.158221	SYT2	+	rs115396054	1	203443026	A	G	ILMN_3183806	1.95e-06	0.0565594
ATP2B4	+	rs115119413	1	203462174	T	C	ILMN_1664772	2.13e-05	0.158221	SYT2	+	rs115119413	1	203462174	T	C	ILMN_3183806	1.95e-06	0.0565594
PPFIBP2	-	rs562702469	11	8284470	T	G	ILMN_1675656	3.64e-05	0.182634	RPL27A	+	rs562702469	11	8284470	T	G	ILMN_1713086	7.73e-06	0.0907578
PPFIBP2	-	rs148507041	11	8321071	A	G	ILMN_1675656	3.64e-05	0.182634	RPL27A	+	rs148507041	11	8321071	A	G	ILMN_1713086	7.73e-06	0.0907578
PPFIBP2	-	rs561413717	11	8331536	T	A	ILMN_1675656	3.64e-05	0.182634	RPL27A	+	rs561413717	11	8331536	T	A	ILMN_1713086	7.73e-06	0.0907578
PPFIBP2	-	rs377110168	11	8377591	A	C	ILMN_1675656	3.64e-05	0.182634	RPL27A	+	rs377110168	11	8377591	A	C	ILMN_1713086	7.73e-06	0.0907578
PPFIBP2	-	rs117645985	11	8605234	T	C	ILMN_1675656	3.64e-05	0.182634	RPL27A	+	rs117645985	11	8605234	T	C	ILMN_1713086	7.73e-06	0.0907578
PPFIBP2	-	rs111587251	11	8606447	T	C	ILMN_1675656	3.64e-05	0.182634	RPL27A	+	rs111587251	11	8606447	T	C	ILMN_1713086	7.73e-06	0.0907578
PPFIBP2	-	rs181638635	11	8608169	G	C	ILMN_1675656	3.64e-05	0.182634	RPL27A	+	rs181638635	11	8608169	G	C	ILMN_1713086	7.73e-06	0.0907578
ATP1B1	-	rs190983230	1	168788601	A	G	ILMN_1658071	3.98e-05	0.187398	ATP1B1	+	rs200980747	1	168550512	C	G	ILMN_1658071	1.69e-05	0.107252
ATP1B1	-	rs369563743	1	169226809	A	G	ILMN_1658071	3.98e-05	0.187398	ATP1B1	+	rs200980747	1	168550512	C	G	ILMN_1658071	1.69e-05	0.107252
ATP1B1	-	rs72706076	1	169441188	G	A	ILMN_1658071	3.98e-05	0.187398	ATP1B1	+	rs200980747	1	168550512	C	G	ILMN_1658071	1.69e-05	0.107252
ATP1B1	-	rs72702147	1	169321767	C	T	ILMN_1658071	3.98e-05	0.187398	ATP1B1	+	rs200980747	1	168550512	C	G	ILMN_1658071	1.69e-05	0.107252
ATP1B1	-	rs79652354	1	169120143	T	C	ILMN_1658071	3.98e-05	0.187398	ATP1B1	+	rs200980747	1	168550512	C	G	ILMN_1658071	1.69e-05	0.107252
ATP1B1	-	rs561026191	1	169483575	C	T	ILMN_1658071	3.98e-05	0.187398	ATP1B1	+	rs200980747	1	168550512	C	G	ILMN_1658071	1.69e-05	0.107252
ATP1B1	-	rs147474835	1	169463296	T	G	ILMN_1658071	3.98e-05	0.187398	ATP1B1	+	rs200980747	1	168550512	C	G	ILMN_1658071	1.69e-05	0.107252
ATP1B1	-	rs72702145	1	169318242	G	A	ILMN_1658071	3.98e-05	0.187398	ATP1B1	+	rs200980747	1	168550512	C	G	ILMN_1658071	1.69e-05	0.107252
ATP1B1	-	rs17517699	1	169263928	G	A	ILMN_1658071	3.98e-05	0.187398	ATP1B1	+	rs200980747	1	168550512	C	G	ILMN_1658071	1.69e-05	0.107252
ATP1B1	-	rs543979663	1	169460782	A	C	ILMN_1658071	3.98e-05	0.187398	ATP1B1	+	rs200980747	1	168550512	C	G	ILMN_1658071	1.69e-05	0.107252
ATP1B1	-	rs539159584	1	169402094	T	G	ILMN_1658071	3.98e-05	0.187398	ATP1B1	+	rs200980747	1	168550512	C	G	ILMN_1658071	1.69e-05	0.107252
ATP1B1	-	rs532572983	1	169343086	G	T	ILMN_1658071	3.98e-05	0.187398	ATP1B1	+	rs200980747	1	168550512	C	G	ILMN_1658071	1.69e-05	0.107252
ATP1B1	-	rs540821422	1	169315656	T	C	ILMN_1658071	3.98e-05	0.187398	ATP1B1	+	rs200980747	1	168550512	C	G	ILMN_1658071	1.69e-05	0.107252
ATP1B1	-	rs6660060	1	169740878	G	C	ILMN_1658071	3.98e-05	0.187398	ATP1B1	+	rs200980747	1	168550512	C	G	ILMN_1658071	1.69e-05	0.107252
ATP1B1	-	rs34700530	1	169745804	T	C	ILMN_1658071	3.98e-05	0.187398	ATP1B1	+	rs200980747	1	168550512	C	G	ILMN_1658071	1.69e-05	0.107252
ATP1B1	-	rs375676822	1	169138542	G	A	ILMN_1658071	3.98e-05	0.187398	ATP1B1	+	rs200980747	1	168550512	C	G	ILMN_1658071	1.69e-05	0.107252
ATP1B1	-	rs192644106	1	169101295	G	C	ILMN_1658071	3.98e-05	0.187398	ATP1B1	+	rs200980747	1	168550512	C	G	ILMN_1658071	1.69e-05	0.107252
ATP1B1	-	rs35108511	1	169716052	C	T	ILMN_1658071	3.98e-05	0.187398	ATP1B1	+	rs200980747	1	168550512	C	G	ILMN_1658071	1.69e-05	0.107252
ATP1B1	-	rs71635625	1	169604249	A	G	ILMN_1658071	3.98e-05	0.187398	ATP1B1	+	rs200980747	1	168550512	C	G	ILMN_1658071	1.69e-05	0.107252
ATP1B1	-	rs72704012	1	169387417	T	C	ILMN_1658071	3.98e-05	0.187398	ATP1B1	+	rs200980747	1	168550512	C	G	ILMN_1658071	1.69e-05	0.107252
ATP1B1	-	rs138126085	1	169277446	G	A	ILMN_1658071	3.98e-05	0.187398	ATP1B1	+	rs200980747	1	168550512	C	G	ILMN_1658071	1.69e-05	0.107252
ATP1B1	-	rs9628661	1	169310283	A	G	ILMN_1658071	3.98e-05	0.187398	ATP1B1	+	rs200980747	1	168550512	C	G	ILMN_1658071	1.69e-05	0.107252
ATP1B1	-	rs3917685	1	169591311	T	C	ILMN_1658071	3.98e-05	0.187398	ATP1B1	+	rs200980747	1	168550512	C	G	ILMN_1658071	1.69e-05	0.107252
ATP1B1	-	rs4656708	1	169701466	C	A	ILMN_1658071	3.98e-05	0.187398	ATP1B1	+	rs200980747	1	168550512	C	G	ILMN_1658071	1.69e-05	0.107252
ATP1B1	-	rs139197234	1	169377983	G	A	ILMN_1658071	3.98e-05	0.187398	ATP1B1	+	rs200980747	1	168550512	C	G	ILMN_1658071	1.69e-05	0.107252
ATP1B1	-	rs536668941	1	169308212	C	T	ILMN_1658071	3.98e-05	0.187398	ATP1B1	+	rs200980747	1	168550512	C	G	ILMN_1658071	1.69e-05	0.107252
ATP1B1	-	rs138265681	1	169023684	C	G	ILMN_1658071	3.98e-05	0.187398	ATP1B1	+	rs200980747	1	168550512	C	G	ILMN_1658071	1.69e-05	0.107252
ATP1B1	-	rs576934065	1	169291149	A	T	ILMN_1658071	3.98e-05	0.187398	ATP1B1	+	rs200980747	1	168550512	C	G	ILMN_1658071	1.69e-05	0.107252
ATP1B1	-	rs115514202	1	168409171	T	C	ILMN_1658071	3.98e-05	0.187398	ATP1B1	+	rs200980747	1	168550512	C	G	ILMN_1658071	1.69e-05	0.107252
FAM89A	-	rs4310431	1	231922559	C	G	ILMN_1652677	2.8e-05	0.169899	FAM89A	+	rs10779838	1	230327678	A	G	ILMN_1652677	3.33e-05	0.151708
FAM89A	-	rs4310431	1	231922559	C	G	ILMN_1652677	2.8e-05	0.169899	FAM89A	+	rs139475789	1	231207025	T	C	ILMN_1652677	3.33e-05	0.151708
FAM89A	-	rs4310431	1	231922559	C	G	ILMN_1652677	2.8e-05	0.169899	FAM89A	+	rs141765037	1	231150917	C	A	ILMN_1652677	3.33e-05	0.151708
FAM89A	-	rs4310431	1	231922559	C	G	ILMN_1652677	2.8e-05	0.169899	FAM89A	+	rs115843782	1	230878790	A	G	ILMN_1652677	2.44e-05	0.135363
FAM89A	-	rs4310431	1	231922559	C	G	ILMN_1652677	2.8e-05	0.169899	FAM89A	+	rs72762634	1	231020820	C	A	ILMN_1652677	7.56e-07	0.0329934
FAM89A	-	rs11122334	1	231919586	T	C	ILMN_1652677	2.8e-05	0.169899	FAM89A	+	rs10779838	1	230327678	A	G	ILMN_1652677	3.33e-05	0.151708
FAM89A	-	rs11122334	1	231919586	T	C	ILMN_1652677	2.8e-05	0.169899	FAM89A	+	rs139475789	1	231207025	T	C	ILMN_1652677	3.33e-05	0.151708
FAM89A	-	rs11122334	1	231919586	T	C	ILMN_1652677	2.8e-05	0.169899	FAM89A	+	rs141765037	1	231150917	C	A	ILMN_1652677	3.33e-05	0.151708
FAM89A	-	rs11122334	1	231919586	T	C	ILMN_1652677	2.8e-05	0.169899	FAM89A	+	rs115843782	1	230878790	A	G	ILMN_1652677	2.44e-05	0.135363
FAM89A	-	rs11122334	1	231919586	T	C	ILMN_1652677	2.8e-05	0.169899	FAM89A	+	rs72762634	1	231020820	C	A	ILMN_1652677	7.56e-07	0.0329934
FAM89A	-	rs11122335	1	231919969	T	A	ILMN_1652677	2.8e-05	0.169899	FAM89A	+	rs10779838	1	230327678	A	G	ILMN_1652677	3.33e-05	0.151708
FAM89A	-	rs11122335	1	231919969	T	A	ILMN_1652677	2.8e-05	0.169899	FAM89A	+	rs139475789	1	231207025	T	C	ILMN_1652677	3.33e-05	0.151708
FAM89A	-	rs11122335	1	231919969	T	A	ILMN_1652677	2.8e-05	0.169899	FAM89A	+	rs141765037	1	231150917	C	A	ILMN_1652677	3.33e-05	0.151708
FAM89A	-	rs11122335	1	231919969	T	A	ILMN_1652677	2.8e-05	0.169899	FAM89A	+	rs115843782	1	230878790	A	G	ILMN_1652677	2.44e-05	0.135363
FAM89A	-	rs11122335	1	231919969	T	A	ILMN_1652677	2.8e-05	0.169899	FAM89A	+	rs72762634	1	231020820	C	A	ILMN_1652677	7.56e-07	0.0329934
FAM89A	-	rs111286380	1	231919809	G	A	ILMN_1652677	2.8e-05	0.169899	FAM89A	+	rs10779838	1	230327678	A	G	ILMN_1652677	3.33e-05	0.151708
FAM89A	-	rs111286380	1	231919809	G	A	ILMN_1652677	2.8e-05	0.169899	FAM89A	+	rs139475789	1	231207025	T	C	ILMN_1652677	3.33e-05	0.151708
FAM89A	-	rs111286380	1	231919809	G	A	ILMN_1652677	2.8e-05	0.169899	FAM89A	+	rs141765037	1	231150917	C	A	ILMN_1652677	3.33e-05	0.151708
FAM89A	-	rs111286380	1	231919809	G	A	ILMN_1652677	2.8e-05	0.169899	FAM89A	+	rs115843782	1	230878790	A	G	ILMN_1652677	2.44e-05	0.135363
FAM89A	-	rs111286380	1	231919809	G	A	ILMN_1652677	2.8e-05	0.169899	FAM89A	+	rs72762634	1	231020820	C	A	ILMN_1652677	7.56e-07	0.0329934
NDRG2	+	rs1243620	14	21047632	A	G	ILMN_1670535	4.82e-05	0.217895	NDRG2	-	rs7146870	14	22080143	G	C	ILMN_2361603	3.22e-05	0.149486
PNPT1	+	rs114917034	2	56656900	T	C	ILMN_1810608	2.4e-05	0.163159	PNPT1	-	rs535627923	2	56016089	A	T	ILMN_1810608	1.15e-05	0.0977923
UBE2D3	-	rs77855727	4	103388303	C	T	ILMN_2320853	2.44e-05	0.16407	UBE2D3	+	rs75136400	4	103068376	G	A	ILMN_2241679	2.92e-05	0.143843
UBE2D3	-	rs77855727	4	103388303	C	T	ILMN_2320853	2.44e-05	0.16407	UBE2D3	+	rs79251264	4	103067169	A	C	ILMN_2241679	2.92e-05	0.143843
UBE2D3	-	rs77855727	4	103388303	C	T	ILMN_2320853	2.44e-05	0.16407	UBE2D3	+	rs115980427	4	103179168	T	G	ILMN_2241679	2.92e-05	0.143843
UBE2D3	-	rs77855727	4	103388303	C	T	ILMN_2320853	2.44e-05	0.16407	UBE2D3	+	rs74638578	4	103143615	T	A	ILMN_2241679	2.92e-05	0.143843
UBE2D3	-	rs77855727	4	103388303	C	T	ILMN_2320853	2.44e-05	0.16407	UBE2D3	+	rs75473566	4	103076289	G	C	ILMN_2241679	2.92e-05	0.143843

## Sheet: Suppl.Table.5
Suppl.Table.5	Frontal-specific hair follicle eQTLs. Best eSNP per gene.
Gene	# SNPs	Best SNP	Chr	Position	A1	A2	Probe	Distance	Pval	FDR	Slope
TDRD6	14	rs552053483	6	46870456	C	A	ILMN_1660261	200645	5.32e-12	4.08e-06	0.431281
CXCL1	32	rs191105830	4	75248687	G	A	ILMN_1787897	511996	3.07e-09	0.000716461	0.470315
ZXDC	12	rs552704609	3	126534497	A	C	ILMN_2348512	-355921	4.7e-08	0.0087108	0.394455
COA4	2	rs34214542	11	74207014	G	T	ILMN_1732750	-622847	7.82e-08	0.0114063	0.331671
DLG2	25	rs141374880	11	83245973	A	G	ILMN_1676215	-79571	8.6e-08	0.0114063	0.412561
TADA2A	3	rs74398459	17	36095246	G	T	ILMN_1696709	269551	1.17e-07	0.0144565	0.333821
C17orf67	2	rs187188078	17	55455184	T	C	ILMN_1707292	-585777	1.46e-07	0.0176059	0.655086
FAM220A	16	rs188128204	7	6373651	A	G	ILMN_2116811	-4237	2.11e-07	0.0208349	0.434186
ARMC6	5	rs150042710	19	18518809	T	C	ILMN_1697118	-649857	2.4e-07	0.0226231	0.640955
NUP153	10	rs115808997	6	17571313	T	C	ILMN_1705907	44717	4.54e-07	0.0360541	-0.484957
SOCS7	2	rs141374540	17	36572672	A	G	ILMN_1753683	16686	4.7e-07	0.0360541	0.255736
SRP14	2	rs28893849	15	40296928	A	T	ILMN_3251269	31110	6.03e-07	0.0371433	0.352365
COQ4	8	rs117723545	9	130682755	A	G	ILMN_3234979	-413515	6.32e-07	0.0371433	0.630235
HDAC2	13	rs544246797	6	114169092	A	T	ILMN_3251283	88726	6.8e-07	0.0371433	0.36077
C10orf12	1	rs191237328	10	98493034	A	C	ILMN_1665508	-252251	7.23e-07	0.0371433	0.241694
EFNA1	1	rs111975162	1	155081237	C	T	ILMN_2371055	-25979	7.28e-07	0.0371433	-0.197765
ATG16L2	2	rs145970411	11	72842381	A	T	ILMN_1664644	301959	7.47e-07	0.0371433	0.39528
TRAF6	10	rs5030507	11	36509566	T	C	ILMN_1783910	1349	7.55e-07	0.0371433	-0.379213
DMPK	35	rs73045962	19	46295327	G	A	ILMN_1689828	-22200	7.78e-07	0.0371433	0.251557
KCTD2	5	rs146941496	17	73061796	A	G	ILMN_1718900	272	9.83e-07	0.0394088	0.383488
SMCP	8	rs201137357	1	152284505	G	C	ILMN_1814631	-572770	1.03e-06	0.0394088	0.365657
LYRM5	11	rs188256223	12	25171597	C	T	ILMN_1744534	-186166	1.05e-06	0.0394088	-0.294833
LGALS8	4	rs17619300	1	236263681	A	T	ILMN_2353358	-448767	1.07e-06	0.0394088	0.24016
IL37	5	rs77737295	2	114011329	C	T	ILMN_1697710	336063	1.07e-06	0.0394088	0.644306
ZFP37	1	rs11793589	9	115682675	C	T	ILMN_1793578	121511	1.22e-06	0.0448123	-0.0754935
WDR11	4	rs202223132	10	122672357	G	A	ILMN_2086222	3518	1.23e-06	0.0451331	-0.497615
CPXM2	13	rs149455756	10	125344768	A	C	ILMN_1741688	160636	1.29e-06	0.045339	0.35171
LRRC72	17	rs191358133	7	16763143	A	G	ILMN_3256748	196591	1.32e-06	0.0459206	0.203666
KRTAP10-5	13	rs9306162	21	45278167	T	C	ILMN_1657191	721399	1.72e-06	0.0546439	0.16492
SHROOM3	4	rs548686362	4	77901105	G	A	ILMN_1685540	200561	1.74e-06	0.0546439	-0.578242
UBQLN3	2	rs117434308	11	5211569	G	A	ILMN_1796639	317260	1.78e-06	0.0556729	0.198456
H2AFX	10	rs671637	11	118510184	T	C	ILMN_1785756	-454636	1.91e-06	0.0581246	-0.601699
HMCES	8	rs73202263	3	129112552	T	C	ILMN_1815682	88593	2.46e-06	0.0643409	0.516796
IDH3B	18	rs184718123	20	2596271	T	C	ILMN_1721669	42842	2.5e-06	0.0643409	0.322173
UCKL1	2	rs116572196	20	62827387	T	G	ILMN_2050255	-255768	2.5e-06	0.0643409	0.166516
AMBN	21	rs114799474	4	71182802	T	C	ILMN_1697611	-289313	2.51e-06	0.0643409	0.848967
SDC1	26	rs187893714	2	20434262	T	C	ILMN_1768953	-9363	2.73e-06	0.0643409	0.641079
TMX3	17	rs75448672	18	66176677	G	T	ILMN_2047206	164878	2.81e-06	0.0643409	-0.524869
MRPS6	1	rs34756011	21	35221329	A	G	ILMN_1723874	-293883	2.81e-06	0.0643409	0.166825
IFI35	6	rs531544907	17	41476340	G	C	ILMN_1745374	309941	2.92e-06	0.0643409	0.541782
LRFN4	16	rs577448679	11	66678560	A	G	ILMN_1809417	50769	2.96e-06	0.0643409	0.179198
THOC3	1	rs72823129	5	175260141	G	A	ILMN_1691949	-126534	2.98e-06	0.0644771	1.30964
CHAMP1	2	rs12872316	13	114846561	G	C	ILMN_1729976	-245995	3.17e-06	0.0674806	0.267534
ANKHD1	1	rs4912651	5	139268265	A	G	ILMN_1766560	-653550	3.4e-06	0.0717038	0.335553
ZNF502	1	rs4683078	3	45212779	T	G	ILMN_1655167	447862	3.43e-06	0.0717038	-0.154402
HPS4	3	rs149745771	22	26738533	A	G	ILMN_1727862	109219	3.46e-06	0.0717038	-0.266215
MRPL11	15	rs74614290	11	66236839	A	G	ILMN_1690371	-33390	3.61e-06	0.0717038	-0.599664
C7orf43	1	rs62485017	7	99734655	A	T	ILMN_1770030	17624	3.63e-06	0.0717038	-0.364466
NMU	17	rs77317546	4	56865046	G	A	ILMN_2162253	-393550	3.64e-06	0.0717038	0.60417
HSPB3	1	rs114697381	5	53837568	A	C	ILMN_1720710	85438	3.8e-06	0.0742288	-0.821654
PDE8B	11	rs182011241	5	77230404	T	C	ILMN_2301725	507972	3.88e-06	0.0742288	0.461684
MX1	15	rs148934070	21	42772655	T	C	ILMN_1662358	-58397	3.97e-06	0.0742288	0.948622
CEP41	9	rs138043955	7	129974302	A	G	ILMN_1797209	62597	4.01e-06	0.0742288	0.450372
ZNF558	3	rs147960739	19	8849784	A	G	ILMN_1766195	70795	4.28e-06	0.0775467	-0.23869
NANOS1	15	rs568943751	10	120828679	G	A	ILMN_1752009	38671	4.31e-06	0.0775467	0.298542
ELMSAN1	25	rs190964642	14	74294100	A	C	ILMN_2297373	-67503	4.49e-06	0.0780657	0.713103
FAM49B	11	rs77198359	8	130792876	T	C	ILMN_1809400	61449	4.64e-06	0.0786953	0.871989
PTPN9	7	rs72734568	15	76281918	T	C	ILMN_1694923	522121	4.73e-06	0.0786953	0.17842
DOK6	1	rs117116857	18	67466489	C	T	ILMN_1785290	-42510	4.76e-06	0.0786953	0.225219
CCDC113	1	rs8056463	16	57474055	T	C	ILMN_1775520	-843105	4.8e-06	0.0786953	0.209837
DDX60	16	rs17053964	4	169274392	T	C	ILMN_1795181	-131363	4.86e-06	0.0786953	0.487231
COQ6	19	rs72725920	14	74519759	C	T	ILMN_1664367	97551	4.91e-06	0.0786953	0.241555
RPL36AL	1	rs77957932	14	50014943	C	T	ILMN_2189933	70846	4.96e-06	0.0792114	0.124813
FBXO31	2	rs4344756	16	87841194	A	G	ILMN_1771139	-478035	4.96e-06	0.0792114	-0.358921
STK16	3	rs75933102	2	219652469	A	G	ILMN_1803774	-460967	5.34e-06	0.0837949	0.434601
MMAB	9	rs73196283	12	109957686	T	C	ILMN_1689156	35725	5.42e-06	0.0837949	0.335551
RAB25	1	rs191679185	1	155902398	A	C	ILMN_1791826	-137723	5.64e-06	0.0837949	0.255365
SLC4A11	1	rs142845602	20	3481017	C	T	ILMN_1735156	-272658	5.71e-06	0.0837949	0.085313
LOR	7	rs182529417	1	153308028	T	C	ILMN_1718387	73489	5.72e-06	0.0837949	-1.91643
CCDC124	27	rs147701275	19	18104634	A	G	ILMN_1811775	50099	5.75e-06	0.0837949	0.42465
COLQ	19	rs115276027	3	15421598	A	G	ILMN_2329114	-70422	5.85e-06	0.0837949	0.306072
NBAS	6	rs7606236	2	15210159	A	G	ILMN_1686392	97046	5.98e-06	0.0841779	0.494312
G3BP2	1	rs78752352	4	75948544	C	G	ILMN_1720422	620188	6.08e-06	0.0841779	-0.658472
CHST15	1	rs116963257	10	125153112	T	C	ILMN_1670926	614292	6.11e-06	0.0841779	0.464172
GRB14	25	rs144942471	2	165366900	T	C	ILMN_1793832	16694	6.14e-06	0.0841779	0.351293
CDC42EP1	16	rs16997517	22	37333936	T	C	ILMN_2401964	-630955	6.26e-06	0.0841779	0.178689
LCE3A	7	rs6691934	1	153328571	G	A	ILMN_1756522	-733204	6.94e-06	0.0925374	0.497362
LYG2	5	rs114600709	2	99849431	T	C	ILMN_1691606	9357	6.95e-06	0.0925374	-0.681225
DOCK6	1	rs77736886	19	10733082	T	C	ILMN_1801226	577062	6.98e-06	0.0928412	0.2921
KCTD11	1	rs356041	17	6453406	G	C	ILMN_1777513	-804751	7.68e-06	0.101825	-0.362846
PBRM1	1	rs191556713	3	53449649	A	G	ILMN_1659470	-867501	7.77e-06	0.101825	0.264048
AFTPH	28	rs117824278	2	64828250	G	A	ILMN_1767722	19872	7.95e-06	0.101825	0.276092
TACC2	1	rs12779420	10	124670638	C	G	ILMN_1686442	823396	8.03e-06	0.102229	0.170358
BRI3BP	1	rs4765593	12	125120688	A	G	ILMN_1800619	-389430	8.09e-06	0.102229	0.0720892
TSKU	11	rs80131549	11	76140951	G	A	ILMN_1801443	-368151	8.16e-06	0.102229	-0.642584
TMEM14B	12	rs143477820	6	10756927	G	A	ILMN_1685258	0	8.5e-06	0.102676	-0.601325
TTLL5	24	rs112682929	14	76050793	A	G	ILMN_1754655	-370280	8.54e-06	0.102676	-0.276498
RBBP8NL	1	rs2427499	20	61737201	G	A	ILMN_1682863	-751800	8.66e-06	0.103916	-0.0753931
PRSS27	2	rs117867875	16	1850914	G	C	ILMN_1775549	911580	9.08e-06	0.106145	0.59447
TYMP	1	rs2235356	22	50710349	A	G	ILMN_3223126	255300	9.16e-06	0.106145	-0.134114
LPCAT2	1	rs837551	16	55564408	A	G	ILMN_1796335	-52525	9.23e-06	0.106145	0.401369
OAT	11	rs7903883	10	126142072	G	A	ILMN_1654441	-55404	9.25e-06	0.106145	0.384281
NFIB	34	rs140116284	9	14158002	T	C	ILMN_1848552	-76051	9.4e-06	0.106145	-0.440311
CX3CR1	34	rs34808142	3	39313524	T	C	ILMN_2088437	-8155	9.66e-06	0.106145	0.534658
ATF6	1	rs61808536	1	162309293	G	T	ILMN_1703471	380587	1.02e-05	0.111347	-0.497453
TSTA3	5	rs145556475	8	144663118	T	C	ILMN_1697777	31940	1.05e-05	0.11366	0.454633
DPM3	2	rs139537200	1	155857103	T	C	ILMN_2402674	-744135	1.07e-05	0.116484	0.253512
SCCPDH	1	rs2387139	1	247792305	A	G	ILMN_1795839	861377	1.09e-05	0.117635	-0.22167
DEAF1	2	rs78131782	11	1481681	C	T	ILMN_1658902	837094	1.09e-05	0.118031	-0.2905
FKRP	4	rs75530218	19	47044236	T	C	ILMN_2368617	-216753	1.12e-05	0.120654	0.311334
ERGIC1	8	rs77289319	5	172226440	A	G	ILMN_1664068	-152970	1.19e-05	0.124902	-0.345721
OR5D18	2	rs184321461	11	55197485	T	A	ILMN_1714449	-390047	1.2e-05	0.124902	0.291918
AEN	2	rs7497141	15	88280584	C	A	ILMN_1814282	-894792	1.2e-05	0.124902	0.25748
MBTPS1	20	rs141366247	16	83938336	A	G	ILMN_1651719	149415	1.22e-05	0.124902	-0.814875
C11orf63	25	rs78087463	11	122867629	T	C	ILMN_2268593	37490	1.23e-05	0.124902	0.374584
C2CD5	3	rs76796201	12	23091755	A	C	ILMN_1682572	-490124	1.23e-05	0.124902	-0.450168
SERPINF1	1	rs2258522	17	1023672	G	A	ILMN_2141482	-657093	1.23e-05	0.124902	0.0996658
TSPAN17	2	rs146087965	5	175913342	A	G	ILMN_2374383	-172578	1.24e-05	0.125724	-0.366056
BMP2	1	rs6054093	20	6304004	G	A	ILMN_1722718	-455483	1.24e-05	0.125724	0.225702
ADHFE1	1	rs139046265	8	68344519	C	T	ILMN_1702858	963670	1.25e-05	0.125724	0.221804
GLUL	2	rs143005155	1	182425699	T	C	ILMN_1653496	-73780	1.27e-05	0.125724	0.417187
BAZ1B	1	rs4377835	7	73069245	T	C	ILMN_1696692	-132635	1.28e-05	0.125724	0.218447
RWDD2B	6	rs77908175	21	30121616	C	T	ILMN_1698233	256783	1.28e-05	0.125724	0.357097
ITGAV	1	rs72906209	2	188376830	A	C	ILMN_2169439	831919	1.29e-05	0.125724	-0.175949
PLCH2	16	rs548964199	1	2769604	A	G	ILMN_1748410	332336	1.3e-05	0.125724	0.288505
GET4	25	rs561764678	7	965424	T	G	ILMN_1795703	49023	1.3e-05	0.125724	0.585569
ALG1	1	rs117453852	16	6002153	T	G	ILMN_1718093	874634	1.33e-05	0.12664	0.190025
AGPAT3	4	rs138178372	21	44784684	T	C	ILMN_1661373	-618880	1.33e-05	0.12664	0.38374
PPP2R5D	2	rs72866064	6	42915166	G	T	ILMN_1780940	-64608	1.34e-05	0.12664	-0.253628
DCAF6	1	rs3738234	1	167802068	G	A	ILMN_2392080	-235543	1.38e-05	0.12664	0.134407
THNSL2	7	rs77893290	2	88510842	T	C	ILMN_3235974	24984	1.42e-05	0.12664	0.541159
GCNT2	2	rs9465262	6	10145143	G	A	ILMN_1680390	-484328	1.44e-05	0.127047	0.391273
PTGS2	1	rs61829959	1	186003090	T	A	ILMN_1677511	638353	1.47e-05	0.129922	0.111076
BUB1B	1	rs7177150	15	40529113	A	G	ILMN_1797307	16220	1.52e-05	0.134141	0.0595262
ATP13A2	29	rs183078880	1	17404964	A	G	ILMN_1704164	-92319	1.59e-05	0.135655	0.442512
ARIH2	1	rs73074821	3	49562219	G	C	ILMN_1792825	539441	1.6e-05	0.135969	-0.188746
OPLAH	1	rs7387956	8	144321947	A	G	ILMN_1711030	784266	1.61e-05	0.136939	0.175378
GNAI1	4	rs10243393	7	79887832	C	T	ILMN_1742044	39593	1.63e-05	0.137734	-0.283916
TNFSF13B	12	rs145892687	13	108984254	T	C	ILMN_2066858	28383	1.68e-05	0.140947	0.449072
ACTRT2	2	rs181742955	1	2177341	G	T	ILMN_1776442	-761893	1.69e-05	0.141228	0.185374
GPBP1L1	5	rs546360092	1	46093401	C	A	ILMN_2076250	-149	1.69e-05	0.140947	-0.431805
IK	2	rs72804954	5	140532641	T	A	ILMN_1699362	491376	1.75e-05	0.144516	-0.348099
ABHD11	1	rs34503455	7	73142035	A	G	ILMN_2338268	10660	1.78e-05	0.146724	0.0552092
PM20D1	1	rs12067709	1	205012737	C	T	ILMN_1751897	-788996	1.81e-05	0.147233	-0.105815
CKAP2	1	rs117917485	13	52120750	C	A	ILMN_2181060	-929655	1.84e-05	0.149207	0.356493
CAMKK1	1	rs9902403	17	2827958	A	C	ILMN_1715372	940519	1.85e-05	0.149943	0.0963414
AKR7A2	1	rs12089208	1	19969244	C	T	ILMN_1677043	-338683	1.88e-05	0.152488	-0.268957
SDHD	3	rs140872886	11	111444607	T	A	ILMN_1698487	-521537	1.89e-05	0.15277	0.205805
SIAE	1	rs193261940	11	125393534	C	T	ILMN_1743412	-886608	1.89e-05	0.15277	0.662128
RAN	1	rs74716970	12	132326206	T	C	ILMN_3307930	965923	1.9e-05	0.15277	-0.18945
EDN1	1	rs201764732	6	11741955	T	A	ILMN_1682775	-554662	1.91e-05	0.153589	-0.188227
NUCKS1	1	rs56002536	1	205520093	A	G	ILMN_1680692	167302	1.94e-05	0.155855	0.140087
CARHSP1	3	rs375006768	16	8928925	C	T	ILMN_1809477	19881	1.94e-05	0.155855	0.445877
ORC2	9	rs2241079	2	201527338	A	G	ILMN_2061452	247940	2.02e-05	0.158221	-0.614589
MYLK	1	rs11718578	3	122836944	A	G	ILMN_1691476	495021	2.03e-05	0.158221	-0.427954
WWOX	10	rs77681430	16	78345274	T	C	ILMN_2415776	211493	2.04e-05	0.158221	0.26119
PYCR1	1	rs8080519	17	79324553	T	G	ILMN_1715178	566371	2.1e-05	0.158221	0.238929
CHMP7	17	rs186736788	8	23157514	C	G	ILMN_1795933	38394	2.11e-05	0.158221	0.253983
KRT5	19	rs143253176	12	52942421	G	C	ILMN_1801632	-33824	2.14e-05	0.158221	0.336449
ALK	1	rs146798078	2	29747472	C	T	ILMN_1753135	-331760	2.15e-05	0.158221	-0.153496
MRRF	1	rs16910935	9	124449774	C	T	ILMN_2298958	-625744	2.17e-05	0.158221	-0.104068
DCBLD1	6	rs783197	6	117552883	G	A	ILMN_1695604	-311436	2.18e-05	0.158221	-0.099735
STK40	1	rs185015388	1	37031425	T	C	ILMN_1679311	-225711	2.19e-05	0.158221	0.497941
CCNB1IP1	8	rs72671271	14	20811581	A	G	ILMN_1752394	-31742	2.19e-05	0.158221	0.431715
AMN	14	rs144382869	14	103195089	T	C	ILMN_1683901	-202071	2.19e-05	0.158221	0.248353
DGCR14	8	rs112294076	22	19708414	T	G	ILMN_1719232	-585787	2.19e-05	0.158221	0.692788
FOXD4L1	1	rs139076984	2	113839374	G	T	ILMN_1781867	-418960	2.2e-05	0.158678	0.282572
AHR	3	rs76072069	7	18024540	A	G	ILMN_2162799	641886	2.24e-05	0.159157	0.224618
PCBD1	1	rs80093737	10	72679630	A	G	ILMN_1786105	-36064	2.25e-05	0.159157	-0.189125
PDCD10	12	rs188070076	3	167713551	T	A	ILMN_1709396	-270308	2.28e-05	0.159157	-0.371581
CAPN10	1	rs1540528	2	242118686	T	C	ILMN_2331553	592230	2.29e-05	0.159157	0.132282
D2HGDH	25	rs191434972	2	242595575	T	C	ILMN_2206272	-112458	2.3e-05	0.159157	-0.622873
ESR2	1	rs229674	14	65281472	C	G	ILMN_2390457	-579735	2.32e-05	0.159372	-0.0750677
CANT1	16	rs113205945	17	76887273	A	G	ILMN_1664012	100799	2.32e-05	0.159157	-0.468991
RFC1	1	rs76290867	4	40237889	A	G	ILMN_2217935	-948512	2.35e-05	0.161648	0.397217
CCND1	1	rs113715758	11	69865438	GCACA	G	ILMN_1688480	396241	2.37e-05	0.162339	-0.199141
HR	1	rs61224284	8	22492300	T	C	ILMN_1657505	-520075	2.38e-05	0.163062	-0.439454
PPM1J	2	rs140745706	1	113905406	A	C	ILMN_1799150	-652540	2.41e-05	0.163159	-0.208127
KIF16B	16	rs144038169	20	16221790	G	A	ILMN_1772786	31777	2.42e-05	0.163159	-0.6492
MGAT4B	2	rs374563716	5	179627339	T	C	ILMN_1722438	-393780	2.45e-05	0.16445	0.120757
BMF	3	rs191381188	15	40186750	A	G	ILMN_1695354	193582	2.48e-05	0.16445	0.209694
NGLY1	8	rs11712725	3	25436670	G	C	ILMN_1728779	324356	2.49e-05	0.16445	-0.504123
TRAK1	1	rs77127731	3	43201732	G	A	ILMN_1782069	947782	2.51e-05	0.16445	-0.218805
IFRD1	8	rs183274130	7	111731012	T	C	ILMN_1687390	-332328	2.51e-05	0.16445	0.251327
CRY1	1	rs11608882	12	108269945	C	T	ILMN_1760593	-883285	2.65e-05	0.167936	-0.249869
MFAP3L	1	rs62344522	4	170784470	T	A	ILMN_1723277	142296	2.66e-05	0.167936	-0.233032
ADCY5	5	rs149797500	3	122878940	A	G	ILMN_1708588	124498	2.69e-05	0.167936	0.329524
C19orf38	3	rs192651205	19	11214556	A	G	ILMN_3240538	234333	2.69e-05	0.167936	0.245035
SAP18	20	rs117090113	13	21705313	T	C	ILMN_1752793	-17398	2.7e-05	0.167936	0.833347
AKIP1	8	rs12421360	11	8812912	C	G	ILMN_2267365	-119809	2.71e-05	0.167936	0.331338
GP1BA	7	rs12449429	17	5805010	T	C	ILMN_1753575	966969	2.71e-05	0.167936	0.148579
DHPS	3	rs185630850	19	13578758	C	T	ILMN_2326997	-792067	2.72e-05	0.167936	0.282148
CEP44	11	rs564042085	4	175612888	T	C	ILMN_2213199	371623	2.73e-05	0.167936	0.412285
ARHGAP5	51	rs186319674	14	32693179	C	T	ILMN_2322747	64948	2.74e-05	0.167936	0.368656
AP2S1	1	rs73051727	19	48230728	T	C	ILMN_1662426	-887943	2.74e-05	0.167936	-0.145999
CCL15	1	rs76192030	17	33772550	T	C	ILMN_1669034	-556354	2.75e-05	0.168259	0.0475828
IL5RA	2	rs143527438	3	2521231	A	G	ILMN_1756455	612718	2.76e-05	0.168678	0.190798
NOP10	1	rs8037593	15	34028019	A	C	ILMN_3240247	605988	2.77e-05	0.169056	-0.198376
GLT8D1	7	rs138709505	3	52541464	T	C	ILMN_2386891	187413	2.81e-05	0.169899	0.377964
NFYA	1	rs187801894	6	41573187	G	T	ILMN_1690325	506781	2.82e-05	0.169899	-0.110079
DDX52	2	rs35991504	17	36122425	G	T	ILMN_2366790	-148551	2.85e-05	0.169899	-0.13612
TCP1	18	rs193076835	6	160178192	A	C	ILMN_2313434	21483	2.86e-05	0.169899	0.407318
HDAC7	30	rs17721101	12	48228821	C	A	ILMN_3266186	-51735	2.89e-05	0.169899	0.27474
KRTAP24-1	7	rs117137727	21	31720598	T	C	ILMN_1908490	-65979	2.9e-05	0.169899	-0.660801
C19orf60	11	rs144144745	19	18438942	T	C	ILMN_3268564	-261361	2.93e-05	0.170224	-0.62375
DDA1	3	rs147246252	19	17823021	A	G	ILMN_1694530	391984	2.98e-05	0.173006	-0.230023
TMEM97	1	rs72847280	17	26267074	T	C	ILMN_1710962	-388101	3.01e-05	0.174428	-0.322203
TRIM67	1	rs144565640	1	232126361	T	C	ILMN_1667915	769233	3.02e-05	0.174428	0.178436
FNIP2	7	rs529529942	4	159781868	A	G	ILMN_3237329	-45888	3.03e-05	0.174428	0.593408
PCF11	4	rs117193789	11	82599312	T	C	ILMN_1798602	-297070	3.03e-05	0.174428	-0.418441
CYB5A	1	rs11661311	18	71871450	A	G	ILMN_1714167	49316	3.03e-05	0.174428	-0.128436
ST8SIA1	1	rs17630922	12	21957838	G	T	ILMN_1664859	396546	3.05e-05	0.174766	0.141464
BCL2L1	1	rs57705377	20	30106671	T	G	ILMN_1654118	145793	3.05e-05	0.174428	-0.123424
SFI1	8	rs147461566	22	32956862	C	T	ILMN_1763887	942650	3.05e-05	0.174428	0.135869
CHRNA10	1	rs61870244	11	3180517	A	G	ILMN_1776314	506512	3.06e-05	0.174766	0.0688025
SPOCK2	1	rs72810392	10	73128495	T	G	ILMN_1656287	690389	3.07e-05	0.175631	0.17902
FAM214B	1	rs76043566	9	34835264	G	A	ILMN_1732609	269031	3.09e-05	0.17606	-0.196995
RECK	9	rs12685361	9	36321726	A	G	ILMN_1688630	197994	3.15e-05	0.17606	0.0916667
HDAC5	2	rs77034317	17	42096209	C	T	ILMN_1810856	58141	3.15e-05	0.17606	0.192703
CLIC6	12	rs184449084	21	36053475	A	G	ILMN_1699665	-36833	3.16e-05	0.17606	-0.184972
PYROXD2	1	rs6584191	10	100152055	G	C	ILMN_1684497	-8490	3.19e-05	0.17606	0.0998455
ATRN	26	rs117975507	20	3942830	C	T	ILMN_1772124	311547	3.2e-05	0.17606	-0.384868
GHITM	1	rs4933992	10	86004077	C	G	ILMN_1728467	91339	3.23e-05	0.17707	-0.118772
NCMAP	12	rs139526809	1	24642651	T	C	ILMN_3246014	-292824	3.24e-05	0.17707	0.385031
RFESD	3	rs74831462	5	95242577	G	A	ILMN_3250850	249813	3.33e-05	0.180203	0.784274
ORMDL2	19	rs147829018	12	56256993	T	C	ILMN_1774708	42386	3.33e-05	0.180203	0.473291
CPE	4	rs181123290	4	166886080	A	C	ILMN_1731374	466880	3.36e-05	0.180526	0.44631
LRRC58	1	rs1733326	3	120103489	T	A	ILMN_3251467	-59322	3.37e-05	0.180526	-0.585051
PGAM5	4	rs112782122	12	132830706	C	T	ILMN_1789944	-467066	3.38e-05	0.180526	0.384439
CEPT1	24	rs11102193	1	111557437	C	T	ILMN_1674405	-124895	3.39e-05	0.180526	0.348099
IL10RB	1	rs17860168	21	34613252	G	A	ILMN_2230892	-56137	3.41e-05	0.180609	-0.284244
B3GNT8	3	rs892215	19	41478002	C	T	ILMN_1741389	453471	3.44e-05	0.180609	0.359461
CSNK2A3	1	rs147287031	11	12114530	T	C	ILMN_2109526	-740894	3.46e-05	0.180609	-0.296343
TBC1D31	1	rs6984928	8	124154275	A	C	ILMN_1744240	-9860	3.49e-05	0.180609	0.151962
VRK2	1	rs13002936	2	59005784	A	T	ILMN_1750088	632211	3.51e-05	0.180609	0.170972
KISS1R	17	rs574958338	19	1048274	A	G	ILMN_1673521	127451	3.51e-05	0.180609	0.649865
BMP4	11	rs150973903	14	54363284	G	A	ILMN_1709734	60106	3.53e-05	0.180609	0.461094
NOA1	30	rs138213835	4	57811340	G	C	ILMN_1665066	18402	3.54e-05	0.180609	0.379258
AUTS2	2	rs118015584	7	70127030	T	G	ILMN_1749081	-130738	3.56e-05	0.181027	-0.3419
DNAJC27	4	rs138205787	2	25341536	T	A	ILMN_1810436	-174791	3.62e-05	0.182634	0.396568
ART5	1	rs78442821	11	4474531	A	G	ILMN_2338733	-814538	3.62e-05	0.182634	0.179614
KLHL33	1	rs10138807	14	21492310	T	C	ILMN_3273620	594792	3.62e-05	0.182634	0.108923
PPFIBP2	15	rs60057952	11	7683337	C	G	ILMN_1675656	8430	3.64e-05	0.182634	-0.32078
DNA2	10	rs190640635	10	70429397	A	C	ILMN_1664682	-255270	3.69e-05	0.183526	0.22546
DNAJC10	15	rs145765878	2	184187173	G	A	ILMN_2151541	544154	3.7e-05	0.183526	-0.410404
SMIM5	1	rs9905663	17	72885623	C	A	ILMN_1690616	-750681	3.7e-05	0.183526	-0.0822733
TEKT1	1	rs55989758	17	5834872	C	T	ILMN_1654570	868457	3.72e-05	0.184233	0.105244
SLC30A1	12	rs530797489	1	211796202	T	C	ILMN_2067852	-47382	3.76e-05	0.184233	-0.59893
LEMD3	1	rs73329645	12	66392586	T	C	ILMN_1727361	750966	3.77e-05	0.184233	-0.196294
SLC39A14	1	rs62492658	8	22484986	T	C	ILMN_1764629	205188	3.79e-05	0.184233	0.386022
VWA5A	2	rs111547939	11	123358506	A	G	ILMN_1764769	-658910	3.79e-05	0.184233	0.443927
BOC	26	rs55811539	3	113032399	C	T	ILMN_1803956	26360	3.8e-05	0.184233	-0.314237
MFAP4	9	rs528130504	17	19249817	T	G	ILMN_1766914	37055	3.81e-05	0.184233	0.212603
TMEM255B	3	rs193255000	13	114743460	T	C	ILMN_1723300	274297	3.84e-05	0.185838	0.321455
WASF3	1	rs148478120	13	27966396	A	G	ILMN_1810797	703707	3.85e-05	0.18587	0.343786
TIGD7	2	rs72764609	16	4135758	C	T	ILMN_1676905	-786731	3.85e-05	0.18587	0.139323
TAX1BP3	1	rs183381	17	3736942	TA	T	ILMN_1803392	-170443	3.85e-05	0.18587	-0.0810229
PFKFB2	5	rs559331459	1	207025905	T	C	ILMN_1723436	-227819	3.89e-05	0.18587	0.296703
TBX21	16	rs72840238	17	45998346	C	G	ILMN_1692714	175040	3.89e-05	0.18587	0.762852
MRPL45	1	rs62074966	17	37297432	A	G	ILMN_1748650	818486	3.93e-05	0.187398	-0.165495
RGS14	1	rs6556312	5	176789719	T	G	ILMN_1696828	-9537	3.95e-05	0.187398	0.24287
TMEM256	2	rs79190353	17	7099156	T	G	ILMN_2201533	207206	3.99e-05	0.187989	-0.296543
PRRC2C	1	rs79552968	1	171569528	A	G	ILMN_1743137	7528	4.02e-05	0.189226	-0.3273
PEPD	1	rs8108154	19	32982448	T	C	ILMN_1717674	895684	4.04e-05	0.189935	0.190122
ALCAM	1	rs62262151	3	105060097	C	T	ILMN_1670870	-235298	4.21e-05	0.197141	-0.154317
SNRPC	1	rs9380469	6	34877314	G	A	ILMN_2086064	135955	4.22e-05	0.197819	-0.0883097
CUX1	1	rs143209020	7	101180892	C	G	ILMN_2278636	-711891	4.22e-05	0.197804	-0.35061
ADCY10	2	rs10489200	1	167816606	T	C	ILMN_1808797	-36559	4.23e-05	0.197819	-0.0980724
RHBDL1	3	rs549518637	16	236041	T	G	ILMN_1660864	-492073	4.23e-05	0.197819	-0.100807
NTF4	1	rs7245633	19	49738687	T	C	ILMN_1737208	-174060	4.26e-05	0.198849	-0.0902373
CYCS	1	rs2721800	7	24692552	C	G	ILMN_1730416	466135	4.28e-05	0.198849	-0.213699
EZH1	15	rs76977609	17	41085080	T	A	ILMN_1791436	-232658	4.29e-05	0.198849	0.297677
TSPYL5	1	rs12115149	8	98363435	A	G	ILMN_1737972	-77335	4.31e-05	0.199634	0.178535
ABHD4	1	rs77294179	14	24052214	A	G	ILMN_1700633	971185	4.37e-05	0.202595	0.217459
FXR2	1	rs11656361	17	8121332	A	C	ILMN_1738699	-626542	4.39e-05	0.203374	0.183236
KIAA1407	16	rs373474162	3	113880053	T	C	ILMN_1727526	-196488	4.55e-05	0.209181	0.279512
CA12	1	rs72750932	15	63810625	C	G	ILMN_1720998	-194757	4.57e-05	0.209931	0.316801
ALDH4A1	1	rs12084189	1	19101605	G	T	ILMN_2406557	96384	4.58e-05	0.210413	0.147924
EIF3B	1	rs4722281	7	3023022	T	C	ILMN_1715636	602966	4.61e-05	0.2109	-0.130368
DHRS11	2	rs295865	17	35151546	A	T	ILMN_1756701	194373	4.62e-05	0.211571	0.16038
TMEM134	1	rs137864217	11	68205117	C	T	ILMN_2340721	-972958	4.64e-05	0.212278	-0.298564
ING2	1	rs13121975	4	184287837	A	G	ILMN_1671265	-143880	4.66e-05	0.213084	-0.285702
RPS26	1	rs773125	12	56394954	G	A	ILMN_2209027	-41274	4.69e-05	0.214017	0.352816
ST7	1	rs115772308	7	116671733	C	T	ILMN_1702175	-198151	4.71e-05	0.21516	0.0904211
STOX1	14	rs190640635	10	70429397	A	C	ILMN_2229214	-223024	4.74e-05	0.215187	-0.524433
CGNL1	1	rs62000041	15	58187557	A	G	ILMN_1730229	344750	4.74e-05	0.215187	-0.318315
DLG5	1	rs74595867	10	80443354	A	G	ILMN_1744709	-892601	4.79e-05	0.217048	-0.224446
PPFIBP1	1	rs561868357	12	28157241	G	T	ILMN_1679460	309475	4.8e-05	0.217105	0.187477
ARID3A	3	rs12973065	19	278322	C	G	ILMN_1670130	-694218	4.81e-05	0.217456	0.240545
CKMT2	1	rs9791117	5	81072979	A	G	ILMN_1764266	510911	4.82e-05	0.217895	-0.0809542
CFDP1	1	rs11149762	16	74730903	G	A	ILMN_1800837	608039	4.86e-05	0.219301	-0.174609
SRPRB	1	rs2692672	3	133555500	G	T	ILMN_1751072	16104	4.9e-05	0.221088	0.175438
CACNG6	1	rs3745179	19	53606704	C	G	ILMN_1779043	-909100	4.91e-05	0.221565	0.0843894
CALU	2	rs2046973	7	128390143	C	G	ILMN_1727194	-21048	4.95e-05	0.222814	0.259135
VCPKMT	1	rs58721247	14	50495827	A	G	ILMN_1781102	80355	4.96e-05	0.223439	0.250366
NUMA1	1	rs56821105	11	72330098	G	A	ILMN_2160005	-615873	4.97e-05	0.223497	-0.2911
TATDN3	1	rs1663627	1	212422565	A	C	ILMN_1744316	-547897	4.98e-05	0.223865	0.0864103
C21orf91	2	rs77891550	21	19539545	G	T	ILMN_1698166	-371971	4.98e-05	0.223762	-0.230486
SLC23A2	1	rs148265619	20	4799268	T	C	ILMN_1746578	34142	4.99e-05	0.224002	-0.214817

## Sheet: Suppl.Table.6
Suppl.Table.6	Occipital-specific hair follicle eQTLs. Best eSNP per gene.
Gene	# SNPs	Best SNP	Chr	Position	A1	A2	Probe	Distance	Pval	FDR	Slope
TELO2	17	rs561125041	16	1464247	T	C	ILMN_1685079	-96146	8.51e-10	0.000300111	1.21146
LPHN1	17	rs147147550	19	14373177	T	C	ILMN_1800894	56296	9.9e-10	0.000300111	0.62314
ENTHD2	5	rs117860115	17	78992225	T	C	ILMN_2056687	210133	4.1e-09	0.00120756	0.162895
GCSAM	2	rs139726887	3	112327159	T	C	ILMN_2388254	-487278	3.41e-08	0.00495736	0.362168
CCL2	11	rs72825069	17	32600928	T	C	ILMN_1720048	17083	6.38e-08	0.00678037	1.72212
RUFY3	3	rs115702490	4	72452170	T	C	ILMN_1730931	793265	1.24e-07	0.0129559	0.414871
GGPS1	6	rs115335216	1	236067212	T	G	ILMN_2346856	559938	2.13e-07	0.0142222	0.221525
MTF1	10	rs3935450	1	37656324	G	T	ILMN_1763828	623697	2.65e-07	0.0176348	-0.221799
CXADR	4	rs55707799	21	18849240	C	T	ILMN_1785900	-90519	3.47e-07	0.021321	-0.427221
KRT37	1	rs35490951	17	40250939	C	A	ILMN_1740813	-673811	3.65e-07	0.021321	1.81064
RFX3	27	rs13288589	9	3182885	T	C	ILMN_1851453	36069	4.01e-07	0.021321	0.39122
GSKIP	6	rs12882534	14	96814795	G	A	ILMN_1712748	-38149	4.42e-07	0.0217936	0.196191
NUDT8	2	rs75652621	11	67818973	A	G	ILMN_2175659	-423178	5.42e-07	0.0264833	0.266311
LGSN	20	rs151174223	6	63958530	G	C	ILMN_2143427	31123	6.02e-07	0.0268539	0.401178
NFE2L3	2	rs77854248	7	25562714	G	A	ILMN_2049766	-662961	6.84e-07	0.0301228	-0.56215
C11orf70	2	rs113417781	11	102677319	G	A	ILMN_1683635	730578	7.28e-07	0.0319449	0.158206
MEX3A	1	rs2236602	1	156627069	G	A	ILMN_3239177	-584885	8.22e-07	0.0354403	0.50648
MEDAG	7	rs114426976	13	31683400	A	G	ILMN_1696048	184162	1.35e-06	0.0520653	0.209873
KLK12	9	rs147205541	19	50929338	T	C	ILMN_1725912	603080	1.38e-06	0.0520653	0.469623
ZNF354A	33	rs486032	5	178005117	C	T	ILMN_1714848	133600	1.4e-06	0.0520653	0.142371
ABAT	8	rs6501135	16	8508311	C	G	ILMN_2404407	-369910	1.53e-06	0.0520653	0.162251
HDAC4	1	rs13407300	2	240105114	G	A	ILMN_1764396	-134553	1.61e-06	0.0539576	-0.690697
GLT1D1	39	rs10847632	12	128988167	C	T	ILMN_1656327	-480993	1.75e-06	0.0541763	0.235399
TMEM194A	16	rs145895541	12	57216866	T	C	ILMN_3228822	232642	1.75e-06	0.0541763	0.768183
CRY2	2	rs34937552	11	45123798	A	G	ILMN_1796180	-780858	1.79e-06	0.0551973	-0.165482
SYT2	11	rs149114045	1	202410269	G	A	ILMN_3183806	-152428	1.95e-06	0.0565594	0.343476
ZBTB46	1	rs58241910	20	62864471	C	T	ILMN_1710092	-488435	1.96e-06	0.0568593	0.120373
DTX2	4	rs10242900	7	76713159	A	G	ILMN_2275098	577877	2.25e-06	0.063543	0.405379
ZNF581	1	rs12981044	19	55994240	T	C	ILMN_1679093	-162592	2.43e-06	0.063543	0.122775
ALKBH3	17	rs183741100	11	43805216	T	C	ILMN_2134062	-136280	2.47e-06	0.063543	0.501256
CYP39A1	1	rs7738939	6	46034726	T	C	ILMN_1808650	483394	2.48e-06	0.063543	0.179952
NGB	4	rs144380275	14	77538373	T	C	ILMN_1800332	193504	2.65e-06	0.063543	0.365875
LZTS1	1	rs113149294	8	19955382	T	C	ILMN_1677261	148509	2.66e-06	0.063543	0.323261
FAM83A	32	rs117893712	8	124284276	C	T	ILMN_1670158	62250	2.67e-06	0.063543	0.62162
ALG3	22	rs75838549	3	183933036	T	C	ILMN_1711886	27266	2.71e-06	0.063543	-0.463945
WFDC3	3	rs73124654	20	44058109	T	A	ILMN_2308903	346069	2.71e-06	0.063543	-3.08586
NARG2	1	rs3905275	15	60833019	C	A	ILMN_2346460	-119072	2.77e-06	0.0647689	0.227402
MRPL55	6	rs189035680	1	227884740	T	C	ILMN_1799289	410995	3.12e-06	0.0682516	0.350567
CDC42SE2	21	rs56401053	5	130721603	T	G	ILMN_2313926	-8407	3.17e-06	0.0682516	-0.561754
ZSWIM3	26	rs34120468	20	44352762	G	A	ILMN_2283196	-154696	3.29e-06	0.0682516	0.362527
RAD51	24	rs545322124	15	41161103	A	G	ILMN_2257432	150042	3.56e-06	0.0706384	0.473114
TGFBR3	9	rs60349716	1	92430462	G	A	ILMN_1784287	-282250	3.77e-06	0.0712233	0.331101
ATOX1	1	rs17740674	5	150831352	G	A	ILMN_1670609	291119	3.8e-06	0.0712233	0.104276
MTUS1	35	rs113008395	8	17584649	A	G	ILMN_1776493	-83132	3.88e-06	0.0712233	0.184783
TMEM177	6	rs114989438	2	121214912	T	C	ILMN_1756402	775496	4.01e-06	0.0729713	0.346263
KDSR	10	rs73480161	18	60692253	T	C	ILMN_2154052	306134	4.06e-06	0.0736525	0.271527
TMEM9B	1	rs57012665	11	8694726	T	C	ILMN_2100815	274205	4.12e-06	0.0736525	-0.135314
RTTN	1	rs1848277	18	68662941	A	G	ILMN_1735658	-991708	4.18e-06	0.0736525	0.17351
TSC1	2	rs34819756	9	136346333	T	C	ILMN_1797367	-579078	4.23e-06	0.0736525	0.291109
RALGPS2	1	rs6425457	1	177937441	G	A	ILMN_1813703	-853335	4.34e-06	0.0736525	-0.0928004
SMG7	4	rs184273614	1	183862443	T	C	ILMN_1706553	339367	4.55e-06	0.0736525	-0.671291
KCNG1	1	rs6063636	20	49954879	A	G	ILMN_1673769	-334542	4.61e-06	0.0736525	-0.112384
C2orf47	4	rs111335054	2	201004427	C	T	ILMN_1795007	175918	4.65e-06	0.0736525	-0.362754
SDC2	1	rs568473508	8	98588777	A	C	ILMN_1784553	964943	4.65e-06	0.0736525	0.456664
AAGAB	1	rs12906270	15	67060856	A	G	ILMN_3237396	432686	4.68e-06	0.0736525	-0.206121
PNPLA2	40	rs11554663	11	824428	T	G	ILMN_1787923	-607	4.69e-06	0.0736525	-0.517829
NFRKB	1	rs117977204	11	129402819	T	G	ILMN_1718990	331861	4.73e-06	0.0742467	0.190697
PPP1R12C	9	rs12983976	19	54702450	T	C	ILMN_1685286	900111	4.75e-06	0.0742659	0.157887
CLEC18C	1	rs118184889	16	70348775	C	T	ILMN_1730964	128079	4.78e-06	0.0746081	0.179861
SP3	2	rs6706007	2	175561442	G	A	ILMN_2389844	-788001	4.82e-06	0.0750797	0.118365
CPT1A	6	rs75022915	11	68522216	C	T	ILMN_1687589	2681	5.08e-06	0.0784266	0.467103
UTRN	4	rs79439190	6	146075429	T	C	ILMN_1655296	913482	5.24e-06	0.0805371	0.226093
OVCA2	1	rs55966237	17	1004507	A	G	ILMN_1677610	-940878	5.27e-06	0.0808141	0.118562
SLC31A2	3	rs4979197	9	115737261	T	C	ILMN_1758938	-188768	5.51e-06	0.083446	0.172622
KSR1	1	rs62057793	17	25856325	A	G	ILMN_1754798	-94202	5.56e-06	0.083446	0.0740424
SDAD1	6	rs370528926	4	77099541	G	A	ILMN_1735360	-228367	5.62e-06	0.083446	-0.419198
AGFG2	1	rs73178550	7	100790988	C	G	ILMN_1703228	627950	5.81e-06	0.083446	0.154975
ISCA1	6	rs140993292	9	88881000	A	G	ILMN_1675421	0	5.84e-06	0.083446	-0.624537
ZNF839	28	rs2274814	14	102717830	A	G	ILMN_1777487	-90367	5.84e-06	0.083446	0.431563
RNF141	12	rs11601268	11	10516834	A	T	ILMN_1815010	16525	6.02e-06	0.0846226	0.440829
RINT1	17	rs191611749	7	105161062	T	C	ILMN_1784584	-46572	6.11e-06	0.0846226	0.639393
C6orf132	4	rs9462853	6	42910666	C	T	ILMN_3270473	-840120	6.21e-06	0.0853561	0.308461
CRK	24	rs118036039	17	2264163	T	C	ILMN_1803302	-938175	6.29e-06	0.0853561	0.388243
ISY1	3	rs115300833	3	128475430	G	A	ILMN_1785857	-373313	6.31e-06	0.0853561	-0.330698
EHD4	2	rs192403647	15	42219214	A	C	ILMN_1720083	-27337	6.32e-06	0.0853561	-0.592962
NSF	11	rs148639599	17	44846767	C	T	ILMN_2330845	12487	6.35e-06	0.0853561	-0.552903
ANAPC11	14	rs554182913	17	80186525	A	C	ILMN_1753773	329184	6.41e-06	0.0853561	0.346952
NOTCH2NL	1	rs72701872	1	145515696	T	A	ILMN_1685445	233363	6.56e-06	0.0859016	-0.30747
EIF4EBP2	18	rs35268278	10	72080769	T	C	ILMN_1728083	-102391	6.62e-06	0.0859016	-0.507723
PPP4R4	21	rs11626009	14	94735812	T	A	ILMN_1775965	-9678	6.98e-06	0.0882831	0.213026
SSNA1	5	rs538946088	9	139982047	G	T	ILMN_1715705	-102511	7.22e-06	0.090072	-0.442074
RGS5	1	rs142100942	1	163229030	T	C	ILMN_1651554	-116202	7.3e-06	0.090072	0.165204
FBXO10	7	rs75170309	9	37603489	T	C	ILMN_2089616	-92303	7.48e-06	0.090072	0.422425
YBX2	2	rs76733190	17	7319325	T	C	ILMN_1755354	127666	7.54e-06	0.0904452	0.161234
RPL27A	12	rs75868796	11	8712173	A	C	ILMN_1713086	7374	7.73e-06	0.0907578	0.297973
RPS27	7	rs10908425	1	154653461	T	C	ILMN_2160819	689338	8.05e-06	0.0936843	-0.330729
ACOT7	1	rs6702309	1	7079257	T	G	ILMN_2332250	-737961	8.11e-06	0.094339	0.378687
HSPA9	3	rs150516172	5	137390702	T	C	ILMN_1679209	500549	8.14e-06	0.0944137	-0.250104
RBBP9	1	rs144737983	20	19276310	A	G	ILMN_1765417	-807649	8.56e-06	0.0977923	0.199019
TAF6	5	rs139814922	7	99632756	G	A	ILMN_2378708	72886	8.79e-06	0.0977923	0.179612
RAB17	4	rs111387909	2	238469656	C	A	ILMN_2052373	13413	8.82e-06	0.0977923	0.246739
INSIG1	35	rs149708826	7	155084823	A	G	ILMN_1793474	-16504	9.04e-06	0.0977923	-1.04112
HAUS4	3	rs10150625	14	23483522	T	C	ILMN_1771003	-67822	9.22e-06	0.0977923	-0.334124
ITM2C	1	rs881185	2	231904412	G	T	ILMN_2366041	160762	9.4e-06	0.0977923	0.262675
SCN4B	1	rs549910966	11	117329281	T	C	ILMN_1695947	675160	9.46e-06	0.0977923	0.309255
LXN	2	rs74778457	3	158489439	C	T	ILMN_1723962	-104906	9.55e-06	0.0977923	0.570758
TMEM184A	48	rs61976951	7	1097841	A	G	ILMN_1815937	485778	9.62e-06	0.0977923	0.646261
RFC5	1	rs4767686	12	118990230	C	T	ILMN_1659364	520438	9.63e-06	0.0977923	-0.189555
CAPRIN1	3	rs78528433	11	34242852	A	G	ILMN_1770676	118818	9.78e-06	0.0977923	0.309012
ZNF383	1	rs183432025	19	38228920	C	T	ILMN_1799488	494614	9.91e-06	0.0977923	0.255445
UHRF2	2	rs74194084	9	6080277	T	C	ILMN_1691444	-425967	1.02e-05	0.0977923	-0.0909274
VIMP	33	rs117474047	15	101723681	G	A	ILMN_1787680	88862	1.03e-05	0.0977923	-0.383223
SLX4IP	5	rs75372115	20	10215152	G	C	ILMN_1715625	-388746	1.04e-05	0.0977923	0.474193
HNRNPU	2	rs59075761	1	245750693	G	C	ILMN_1743677	-737001	1.05e-05	0.0977923	-0.304298
PCNA	2	rs151089757	20	4372237	G	A	ILMN_1706958	728349	1.07e-05	0.0977923	0.20403
C1orf177	15	rs3753406	1	54745567	C	T	ILMN_1777437	-561995	1.09e-05	0.0977923	0.0950274
RRAS	1	rs143027390	19	50770918	T	C	ILMN_1780825	-632208	1.1e-05	0.0977923	-0.183407
TRPV6	4	rs141216913	7	142200656	G	T	ILMN_2368188	368641	1.1e-05	0.0977923	0.204366
NDUFA10	26	rs113842111	2	240966413	T	G	ILMN_1791119	-66026	1.12e-05	0.0977923	-0.840136
SLC16A3	2	rs548556787	17	81009782	G	A	ILMN_2364022	812425	1.12e-05	0.0977923	0.148224
PRPF31	2	rs143755645	19	55492448	G	C	ILMN_1719204	857591	1.13e-05	0.0977923	0.0944058
NNMT	16	rs117365615	11	114111776	A	G	ILMN_1715508	-70995	1.16e-05	0.0977923	0.419542
RPL11	6	rs148714772	1	24482339	T	C	ILMN_1672446	459950	1.18e-05	0.0977923	0.439746
SYTL2	1	rs74610635	11	84521369	G	A	ILMN_2336609	884450	1.18e-05	0.0977923	0.497293
EGF	188	rs17040841	4	110690636	A	T	ILMN_1690733	-242295	1.2e-05	0.0977923	0.333012
TET1	13	rs4746804	10	70699277	A	G	ILMN_3247163	245200	1.2e-05	0.0977923	0.312692
HNRNPK	10	rs55989801	9	86216219	T	C	ILMN_2378048	367466	1.23e-05	0.0990904	-0.153459
MBLAC2	2	rs73172334	5	88823788	T	C	ILMN_1769449	930759	1.23e-05	0.0994684	-0.277703
C11orf1	8	rs117369151	11	111523553	G	A	ILMN_2128967	-230949	1.27e-05	0.0997606	-0.366363
PRICKLE1	1	rs991703	12	43195712	T	G	ILMN_1741356	-342554	1.27e-05	0.0997606	-0.320157
SLC40A1	5	rs71434658	2	190275563	T	A	ILMN_1761833	150254	1.27e-05	0.0997606	-0.311174
SLC25A10	2	rs11655742	17	78910061	G	C	ILMN_1804090	-777922	1.29e-05	0.0997606	0.266389
RABL2A	17	rs535633863	2	114314028	T	C	ILMN_1724598	-86051	1.3e-05	0.0997606	0.221449
MED9	6	rs147277870	17	17281004	A	G	ILMN_1794108	-115321	1.31e-05	0.0997606	0.724439
N4BP2L1	37	rs12858723	13	32980070	T	C	ILMN_2344650	-3830	1.31e-05	0.0997606	0.48288
C12orf49	1	rs113102376	12	116918970	T	C	ILMN_2161556	234918	1.32e-05	0.0999649	0.243882
PSAPL1	2	rs76095476	4	8291787	T	C	ILMN_3238264	-859585	1.34e-05	0.10031	0.8377
GPR98	25	rs114529322	5	90387293	G	A	ILMN_1690621	-72394	1.35e-05	0.10031	0.435329
LDB2	8	rs145129493	4	16448902	A	G	ILMN_1800697	54428	1.38e-05	0.101729	0.948896
MRPS30	5	rs116551544	5	44892315	T	C	ILMN_1726743	77251	1.41e-05	0.101729	-0.51723
MSANTD2	25	rs139666137	11	124738477	A	C	ILMN_1773148	-101260	1.42e-05	0.101729	0.303089
BCL10	11	rs79475763	1	85675579	A	G	ILMN_1716446	58027	1.43e-05	0.101729	0.398973
PARP9	3	rs180794292	3	122254414	C	T	ILMN_2053527	-7383	1.44e-05	0.101729	0.254129
NMRK1	13	rs191109814	9	77458578	G	A	ILMN_1674650	217635	1.45e-05	0.101729	0.672943
PSMG1	13	rs188340212	21	40585574	T	C	ILMN_1779264	-33670	1.45e-05	0.101729	-1.10949
GIT1	3	rs113019259	17	27775577	G	A	ILMN_1733155	125103	1.46e-05	0.101729	0.295291
MRPL44	3	rs142772716	2	225204500	A	G	ILMN_1671452	372744	1.46e-05	0.101729	0.412388
WLS	1	rs115853050	1	67871782	T	G	ILMN_1753913	720118	1.46e-05	0.101729	0.33564
FBXO11	17	rs7568939	2	48070044	T	C	ILMN_1678404	-23881	1.47e-05	0.101729	-0.124384
TUBA1A	1	rs12302850	12	49110031	A	G	ILMN_2148819	468806	1.47e-05	0.101729	-0.17211
SMOC2	1	rs79046990	6	169425516	G	C	ILMN_1719641	357163	1.48e-05	0.102539	0.543344
TRAPPC8	2	rs1449072	18	29310938	C	G	ILMN_1796240	99380	1.49e-05	0.102907	-0.233985
SBNO1	11	rs192138191	12	123521886	G	T	ILMN_1739943	260653	1.51e-05	0.103491	0.219176
LRP8	1	rs58966590	1	54542802	G	A	ILMN_1677765	-831220	1.53e-05	0.104153	0.145105
SNORD32B	2	rs532762759	6	29849392	T	G	ILMN_3247170	299293	1.53e-05	0.104153	0.122881
EEF1B2	2	rs76325945	2	206698554	T	C	ILMN_1694587	-326799	1.57e-05	0.105462	-0.151361
TMEM245	28	rs147952363	9	111738946	C	G	ILMN_1788384	38795	1.58e-05	0.105462	0.512569
C8orf82	1	rs9644666	8	145670790	G	C	ILMN_1693862	81043	1.59e-05	0.105983	-0.072239
NFATC3	2	rs142623131	16	68594905	T	C	ILMN_1755983	346608	1.6e-05	0.105983	0.183767
ARHGAP12	2	rs117314878	10	31890806	A	G	ILMN_2101810	204718	1.62e-05	0.105983	0.20134
ROPN1	1	rs72974523	3	124574177	G	T	ILMN_1668766	-885161	1.62e-05	0.105983	0.48391
GBA2	1	rs117148875	9	35920611	A	G	ILMN_1674560	-183504	1.63e-05	0.105983	-0.442965
NDUFA9	10	rs55993315	12	4028950	G	T	ILMN_1760741	-767202	1.63e-05	0.105983	0.194163
ZNF669	18	rs140277704	1	247159480	G	T	ILMN_1770172	104274	1.63e-05	0.105983	0.30015
CACNG1	21	rs117478678	17	64799623	A	G	ILMN_1724306	-253166	1.65e-05	0.105983	0.279636
LYRM9	16	rs147040472	17	25644955	T	C	ILMN_2099487	560746	1.67e-05	0.106297	0.266975
ENAH	2	rs147524905	1	226539395	T	A	ILMN_1716552	-864626	1.69e-05	0.107579	0.369039
TAGLN	1	rs11608153	11	117716663	G	A	ILMN_1778668	641244	1.69e-05	0.107219	0.462651
CCDC91	4	rs117620637	12	28823402	T	C	ILMN_1676523	120774	1.71e-05	0.108366	-0.684023
INTS1	1	rs12540579	7	1882227	A	C	ILMN_1793854	371992	1.71e-05	0.108366	-0.154872
CCDC94	2	rs35632432	19	4499850	A	G	ILMN_3245310	231016	1.72e-05	0.108576	-0.0452356
ECHDC1	10	rs144142954	6	127538596	T	A	ILMN_2167011	71676	1.74e-05	0.109077	-1.01363
ZNF107	7	rs117025061	7	64068477	T	C	ILMN_1766974	-102137	1.74e-05	0.109077	0.341723
AAK1	4	rs62133345	2	69178524	C	T	ILMN_1688755	512899	1.77e-05	0.11017	0.277162
SLC25A12	1	rs312922	2	172566634	T	C	ILMN_1788053	74494	1.78e-05	0.110669	0.20413
MIER2	1	rs62103050	19	282875	A	G	ILMN_1766159	22861	1.79e-05	0.111144	-0.278413
POLR2C	9	rs117019691	16	57505625	G	C	ILMN_1659411	0	1.79e-05	0.111144	-0.748552
HS1BP3	1	rs2276606	2	20069414	A	G	ILMN_1738237	748475	1.81e-05	0.112016	-0.177773
CSE1L	1	rs3091574	20	47638969	C	A	ILMN_1665797	-72473	1.83e-05	0.113185	-0.110951
PPP3R1	5	rs72832011	2	68411185	C	T	ILMN_1796962	-4839	1.85e-05	0.114045	0.549016
SAFB	1	rs11878857	19	5555931	C	G	ILMN_1722059	-112335	1.86e-05	0.115088	0.225821
ZNF165	1	rs549334430	6	27770981	T	A	ILMN_1806502	-286173	1.87e-05	0.115558	-0.231847
KCTD12	1	rs189876071	13	76457649	T	C	ILMN_1742332	998623	1.94e-05	0.11919	0.217658
DYRK1A	38	rs138004108	21	38873581	G	C	ILMN_1664560	-13162	1.96e-05	0.11919	-0.643795
GORAB	5	rs145286504	1	170916025	A	G	ILMN_2121316	393821	2.01e-05	0.121987	0.330164
PUF60	2	rs12680172	8	144235413	A	G	ILMN_1779404	663236	2.01e-05	0.121987	0.27677
HS3ST6	2	rs8460	16	2028402	C	A	ILMN_1710416	-66474	2.04e-05	0.123532	0.12091
EXOSC3	1	rs12378284	9	36972782	C	T	ILMN_1708936	807827	2.11e-05	0.123985	0.177532
SRRD	3	rs713734	22	26364619	G	A	ILMN_1666306	-523054	2.11e-05	0.123985	0.294092
USH1G	50	rs540514571	17	72631508	G	A	ILMN_1717852	280887	2.13e-05	0.123985	0.423504
DDX58	13	rs77910820	9	32465751	G	A	ILMN_1797001	-9806	2.14e-05	0.123985	0.270698
NME1	1	rs117355256	17	48656433	T	G	ILMN_1713875	-575293	2.15e-05	0.124428	0.164156
SEMA4G	2	rs2902405	10	102614847	G	T	ILMN_1676248	-130330	2.16e-05	0.125236	0.137203
BNIP1	2	rs1994236	5	173401343	G	A	ILMN_2318733	810337	2.17e-05	0.125511	0.0860667
RCBTB2	5	rs35066667	13	48692891	A	T	ILMN_2148668	370553	2.18e-05	0.125585	-0.428081
ARMC1	4	rs190281248	8	66543666	C	G	ILMN_1722066	-28490	2.23e-05	0.128656	0.542161
DLX3	1	rs17702032	17	48166141	C	A	ILMN_1789357	-98596	2.24e-05	0.128801	0.161025
CYP27B1	7	rs565444357	12	58515224	T	C	ILMN_1740418	-358876	2.27e-05	0.130262	0.678099
RAB15	9	rs7143701	14	65759533	G	A	ILMN_1731699	-346656	2.29e-05	0.130395	0.282011
FBLN2	1	rs80017713	3	13098542	T	C	ILMN_2390919	-581154	2.31e-05	0.131461	-0.639872
USF1	18	rs76138322	1	160158031	A	G	ILMN_2353240	851519	2.33e-05	0.131461	0.167286
FBXO33	6	rs551532451	14	39493958	A	G	ILMN_1664826	373215	2.36e-05	0.132618	-0.53809
TRIOBP	1	rs139105452	22	37462173	T	C	ILMN_1735788	-708143	2.36e-05	0.132618	-0.355097
ZNF83	1	rs7251352	19	52276704	A	G	ILMN_2190414	839589	2.42e-05	0.135363	0.279496
HPS1	13	rs148660743	10	100109676	T	C	ILMN_1741483	79653	2.43e-05	0.135363	0.301304
KRTAP5-1	1	rs10794339	11	900929	G	C	ILMN_2191003	704868	2.44e-05	0.135363	0.344535
KRT16	2	rs8073131	17	39780140	C	T	ILMN_1736760	-12924	2.46e-05	0.135363	0.177185
PSMC2	1	rs60731790	7	103411096	A	T	ILMN_1768784	402687	2.47e-05	0.135363	-0.196523
CYBRD1	2	rs11890865	2	172074656	T	C	ILMN_2087692	-339605	2.48e-05	0.135363	0.615947
MAPK8IP2	11	rs575299422	22	50927002	T	G	ILMN_2351262	-122285	2.48e-05	0.135363	0.263666
SSBP3	6	rs2297658	1	53746473	C	T	ILMN_1814165	946043	2.49e-05	0.135363	0.113629
ZNF274	8	rs113434403	19	58535598	A	G	ILMN_1688629	-188934	2.51e-05	0.135363	-0.463537
UCK1	4	rs72763639	9	134965448	T	C	ILMN_1719785	-565649	2.53e-05	0.135372	0.0869924
OPRL1	2	rs534324862	20	62597255	A	G	ILMN_1713758	-126116	2.54e-05	0.13549	0.179911
GADD45B	2	rs72987495	19	2366242	T	G	ILMN_1718977	-111822	2.58e-05	0.136578	0.318208
DDB1	1	rs11230584	11	60836117	A	G	ILMN_1775937	230929	2.61e-05	0.137847	0.0641821
FKBP1A	1	rs17702759	20	930480	T	C	ILMN_1702237	422169	2.62e-05	0.138696	0.28605
SUSD1	4	rs13293149	9	115735828	A	C	ILMN_1709750	-932355	2.63e-05	0.138744	-0.0797726
GALNT11	1	rs4143450	7	152674391	A	C	ILMN_1651819	855399	2.64e-05	0.13929	-0.124571
SLC24A3	1	rs17811886	20	18985664	G	A	ILMN_1663519	-717682	2.64e-05	0.139208	0.211355
STK24	1	rs7317938	13	99234361	T	C	ILMN_1695773	-5294	2.65e-05	0.139568	0.071134
PPP6R1	1	rs8101262	19	55148390	A	C	ILMN_1794085	592944	2.68e-05	0.140677	0.183952
TRIT1	2	rs12127002	1	40384968	A	G	ILMN_1727692	-77980	2.68e-05	0.140677	-0.269708
DTYMK	6	rs150213768	2	242583011	G	A	ILMN_1716445	42187	2.71e-05	0.140853	-0.310851
TEF	7	rs543725218	22	42536196	T	G	ILMN_1706511	741081	2.71e-05	0.140853	0.333095
RAP1GDS1	4	rs151289905	4	99437366	C	T	ILMN_2106167	73949	2.74e-05	0.142179	-0.625452
GABARAPL2	1	rs58581549	16	75496951	T	G	ILMN_2046315	-114587	2.77e-05	0.142179	-0.460549
COX4I1	16	rs548527862	16	85972249	A	T	ILMN_1652207	131691	2.78e-05	0.142179	-0.221851
GOLGA7B	1	rs146358118	10	99778131	C	G	ILMN_3247945	150397	2.78e-05	0.142179	0.30117
INPPL1	4	rs142565803	11	71926702	A	G	ILMN_1728426	-23272	2.8e-05	0.142179	0.880633
COL4A1	6	rs145114719	13	111327370	G	C	ILMN_1653028	-525798	2.81e-05	0.142179	0.473549
PGF	3	rs141242290	14	75113496	G	A	ILMN_1809813	295221	2.82e-05	0.142179	0.804844
APCDD1L	17	rs77905464	20	57096046	C	T	ILMN_1689431	-61536	2.83e-05	0.142179	0.418884
HAUS6	14	rs190581275	9	19221783	A	C	ILMN_1664139	-168367	2.83e-05	0.142179	0.238735
RRP7A	12	rs111852645	22	42889586	G	A	ILMN_1688178	19039	2.85e-05	0.142179	-1.29383
DSEL	1	rs2222197	18	65805576	T	A	ILMN_2167915	-631625	2.88e-05	0.142481	0.0457625
UBE2L3	28	rs117923774	22	21939766	T	C	ILMN_1677877	-38423	2.88e-05	0.142179	-0.580401
C7orf26	1	rs7790210	7	5906002	G	A	ILMN_1730048	-742113	2.89e-05	0.142481	0.124459
CUL7	2	rs114927752	6	42649276	G	T	ILMN_1672393	356209	2.89e-05	0.142769	-0.0592536
CYB5D2	2	rs2085043	17	4040691	C	T	ILMN_1696254	-19914	2.93e-05	0.143843	-0.312151
PPHLN1	5	rs4768458	12	43268548	C	G	ILMN_1706593	426547	2.95e-05	0.143843	0.24194
BOLA3	10	rs528676385	2	74542568	T	C	ILMN_1786658	-179813	2.97e-05	0.143843	-0.47832
CHMP4C	2	rs74689713	8	82510732	C	T	ILMN_1711542	-160749	3.01e-05	0.143843	-0.675445
ISCU	1	rs7295928	12	108280027	A	G	ILMN_2409062	-682700	3.02e-05	0.143843	0.162937
KIAA1549L	58	rs7123689	11	33695449	G	A	ILMN_1653836	-100	3.03e-05	0.143843	0.244088
CDYL	1	rs141851420	6	4382805	A	G	ILMN_1678075	-572750	3.07e-05	0.144854	0.235771
EIF2B4	1	rs7591661	2	26711106	C	G	ILMN_2356672	876271	3.08e-05	0.144854	0.0682845
GATA3	2	rs7076875	10	7723878	G	A	ILMN_2406656	-393088	3.1e-05	0.145439	0.160839
GCDH	3	rs76573469	19	13665321	A	G	ILMN_2296843	654838	3.12e-05	0.146004	0.19078
MGP	4	rs80343393	12	14957772	A	G	ILMN_2071809	77391	3.12e-05	0.146004	-1.15154
LRRC56	1	rs3020895	11	497359	G	A	ILMN_1759772	-57443	3.13e-05	0.146201	-0.168369
RPS14	1	rs246476	5	150684838	A	C	ILMN_1666635	-858386	3.18e-05	0.148416	0.136003
SP4	1	rs2965362	7	21778966	A	C	ILMN_1721081	225312	3.21e-05	0.149486	0.134364
SGOL2	2	rs17629940	2	201076130	G	T	ILMN_1746699	-362469	3.26e-05	0.150925	0.19186
BRF1	4	rs10254	14	105213376	T	C	ILMN_1703686	462520	3.29e-05	0.151708	0.242422
HS3ST3A1	2	rs72820662	17	14296424	C	G	ILMN_1692056	-897040	3.3e-05	0.151708	0.212521
DNTTIP1	1	rs877608	20	43735829	A	T	ILMN_1691117	-703949	3.32e-05	0.151708	-0.278703
LPHN3	31	rs142054730	4	62970583	T	G	ILMN_1692623	34368	3.35e-05	0.151708	0.480837
VPS13C	1	rs62008436	15	61877291	G	T	ILMN_2398865	289799	3.38e-05	0.15223	0.101116
C1orf168	3	rs1102186	1	57199973	A	G	ILMN_1761999	-14937	3.42e-05	0.153221	-0.0939244
ANKRD29	3	rs141458872	18	21567356	G	A	ILMN_2075643	-387027	3.45e-05	0.153221	0.563195
NAMPT	1	rs112158004	7	105355302	T	G	ILMN_1653871	538242	3.46e-05	0.153221	0.480604
GRB10	1	rs17152362	7	51848220	A	G	ILMN_1652662	-987114	3.48e-05	0.153221	0.173011
CTNNB1	32	rs73079664	3	41212192	C	G	ILMN_1746396	-65684	3.5e-05	0.153221	0.753634
LMBR1	2	rs7789159	7	155952203	T	C	ILMN_1764522	523623	3.53e-05	0.153221	0.142712
MYNN	35	rs533268404	3	169591178	T	A	ILMN_1672287	86275	3.55e-05	0.153221	-0.443666
ZNF812	34	rs62105698	19	9801832	T	C	ILMN_3305614	856	3.56e-05	0.153221	0.280141
C5orf51	1	rs12656855	5	41454719	T	C	ILMN_3237850	-466408	3.57e-05	0.153408	-0.178849
CDK1	7	rs80214098	10	62304474	T	C	ILMN_1747911	-247439	3.58e-05	0.153408	-0.40266
SSC5D	5	rs2304123	19	56887208	T	C	ILMN_1763891	856855	3.59e-05	0.153606	-0.0681958
SLC39A7	4	rs180862822	6	33339736	A	G	ILMN_1778053	167853	3.62e-05	0.154423	0.271974
ZNF417	1	rs117015855	19	57862082	T	C	ILMN_1760294	556961	3.63e-05	0.15445	0.186553
LEPR	4	rs183876570	1	66188399	T	C	ILMN_2234956	87334	3.64e-05	0.15445	0.170736
DHRS12	10	rs17597960	13	52294344	G	T	ILMN_1719915	48081	3.66e-05	0.15445	0.271555
HERC2	3	rs146550637	15	28400982	T	C	ILMN_1812787	-42832	3.66e-05	0.15445	0.36575
KCTD9	13	rs117287345	8	25263859	G	A	ILMN_1653612	21579	3.7e-05	0.15445	-0.551585
RAPGEF4	24	rs75618547	2	173775093	G	A	ILMN_1661802	-141824	3.7e-05	0.15445	0.560316
ALOX5AP	1	rs9579522	13	30625724	C	T	ILMN_1797875	-712624	3.73e-05	0.154719	0.216987
FAM96B	21	rs192622251	16	66805656	G	A	ILMN_1779813	160440	3.76e-05	0.154719	-0.355754
POMT1	1	rs7852743	9	133865384	C	T	ILMN_2305721	-533448	3.76e-05	0.154719	-0.234978
ACP1	6	rs113239513	2	735964	G	C	ILMN_1669633	458175	3.78e-05	0.154719	-0.352009
MIDN	17	rs137978778	19	1402864	C	T	ILMN_1746408	143858	3.81e-05	0.154719	0.304565
TMEM8A	1	rs113817326	16	1389394	A	G	ILMN_1741371	-967194	3.82e-05	0.154719	0.31418
AFAP1	2	rs79910822	4	7817661	C	T	ILMN_1701998	-57149	3.85e-05	0.154719	-0.420467
PRPSAP2	2	rs531197062	17	18892146	A	C	ILMN_1812445	58068	3.85e-05	0.154719	-0.496579
PIK3CD	1	rs4543799	1	10174189	A	G	ILMN_1766275	385542	3.86e-05	0.154719	-0.090813
SNORD83B	17	rs141383333	22	40098996	G	A	ILMN_3244157	-389116	3.87e-05	0.154719	0.318011
ADK	1	rs141531752	10	76822901	A	G	ILMN_1801020	886337	3.88e-05	0.154719	-0.281728
EFR3A	2	rs117438739	8	133995807	C	G	ILMN_1664776	970457	3.92e-05	0.155822	-0.445558
MARVELD3	1	rs34113301	16	70810760	C	T	ILMN_2255256	-857982	3.92e-05	0.155802	0.0803903
MED28	3	rs114229263	4	17161471	T	G	ILMN_1749821	-464338	3.93e-05	0.155848	-0.325099
OGFOD1	1	rs77799319	16	55939088	A	C	ILMN_1677953	-572071	3.93e-05	0.155848	-0.333794
FBXW11	2	rs254883	5	171121209	C	G	ILMN_2394571	167803	3.94e-05	0.156038	0.110317
PXDN	1	rs17039339	2	2124706	A	G	ILMN_3237946	487701	3.97e-05	0.156839	0.308319
DENND1B	1	rs6428454	1	198339898	C	A	ILMN_1862521	-865764	4.01e-05	0.158134	-0.186855
ACAD8	1	rs10894898	11	134761316	G	A	ILMN_2225595	626001	4.07e-05	0.159711	0.152456
TPRN	1	rs9802785	9	140019916	G	A	ILMN_1664283	66261	4.11e-05	0.161023	0.0625888
USP33	1	rs79020781	1	78747761	TG	T	ILMN_1723536	-567384	4.15e-05	0.161228	-0.116143
DUSP14	1	rs143188375	17	36682193	A	G	ILMN_1666546	808819	4.17e-05	0.161228	-0.576432
SNORA70C	11	rs148344251	9	119759241	C	T	ILMN_1661917	183951	4.17e-05	0.161228	0.270027
DLX1	25	rs193185705	2	172860968	G	C	ILMN_1672094	-93052	4.18e-05	0.161228	0.652808
GGA3	1	rs11652645	17	72882109	A	G	ILMN_2402972	351149	4.19e-05	0.161476	0.109055
GUCY2C	16	rs149216196	12	14754761	G	C	ILMN_2144663	11052	4.22e-05	0.161679	0.408813
CTSK	4	rs72710172	1	151474082	A	G	ILMN_1758895	-705045	4.27e-05	0.162711	-0.278473
SAMD1	17	rs74708316	19	15182666	T	G	ILMN_1658821	-983386	4.28e-05	0.162711	-0.149788
PEX2	1	rs17333765	8	77136720	G	T	ILMN_1743299	758920	4.32e-05	0.164281	-0.324494
IQGAP3	1	rs16837415	1	156443232	G	A	ILMN_1695418	52496	4.33e-05	0.164655	0.171155
KRT40	1	rs12951055	17	39202919	A	C	ILMN_1658563	68392	4.34e-05	0.164964	-0.371437
IWS1	1	rs75570509	2	128656779	G	C	ILMN_1747241	-412571	4.4e-05	0.16643	0.184287
NT5C3B	1	rs12450334	17	40220547	A	G	ILMN_1750511	-238898	4.4e-05	0.16643	-0.140514
RNLS	1	rs78792772	10	90809251	G	A	ILMN_1718520	-764332	4.41e-05	0.16643	0.426738
TUFT1	1	rs115385042	1	151698829	A	G	ILMN_1781374	142944	4.43e-05	0.16643	-0.320216
CDV3	3	rs182804903	3	133268072	T	C	ILMN_1810977	-40362	4.44e-05	0.16643	-0.602009
FAM120AOS	14	rs558989976	9	95987562	T	C	ILMN_1750969	221638	4.46e-05	0.16643	-0.429106
SERPINB1	25	rs80262250	6	2837258	T	C	ILMN_1679133	-3144	4.47e-05	0.16643	0.95175
RAB5B	7	rs189527298	12	57084614	T	C	ILMN_1752582	696329	4.48e-05	0.16643	0.3069
BNIP2	1	rs34894301	15	59945107	A	C	ILMN_1770803	10281	4.5e-05	0.167012	-0.114641
TSN	1	rs11122874	2	122612702	C	T	ILMN_1768913	87334	4.53e-05	0.167414	0.0975826
SHOC2	11	rs72823883	10	112523574	C	T	ILMN_2158242	-249255	4.54e-05	0.167414	0.430411
TIMM23	1	rs7073861	10	52539416	A	G	ILMN_1673746	-919034	4.54e-05	0.167414	0.321573
ANKRD26	1	rs148102176	10	27029125	A	C	ILMN_1740161	272804	4.55e-05	0.16765	0.165791
ZIK1	10	rs144479077	19	58634823	T	C	ILMN_1719646	531928	4.55e-05	0.167414	-0.141149
BCL11A	1	rs17537701	2	60928367	A	G	ILMN_1752899	-243470	4.58e-05	0.168375	0.137601
MEX3C	1	rs62092889	18	48658110	A	G	ILMN_1658182	43163	4.58e-05	0.168375	0.129575
KCNQ2	1	rs150022158	20	61090330	T	G	ILMN_1703500	960645	4.59e-05	0.168375	-0.166219
JADE2	3	rs150593879	5	134546978	T	C	ILMN_1795285	628227	4.6e-05	0.168375	0.386576
KRTAP4-5	2	rs112199584	17	38541455	T	C	ILMN_1659475	763884	4.61e-05	0.168375	-0.552352
ZDBF2	13	rs183033594	2	207139294	A	G	ILMN_1740711	-39176	4.61e-05	0.168375	0.224554
KIF26A	1	rs60766757	14	103681642	T	C	ILMN_3242725	-965304	4.62e-05	0.168598	0.371994
ZDHHC14	1	rs2135206	6	157963017	G	T	ILMN_2309926	-131379	4.63e-05	0.168837	0.178159
C2CD2	8	rs3930584	21	43125707	G	A	ILMN_1652512	179559	4.64e-05	0.168837	0.375936
SLC46A1	1	rs3884011	17	27378001	A	G	ILMN_1673681	-646318	4.64e-05	0.168837	0.078979
PAK4	3	rs76609107	19	39980612	T	C	ILMN_2354673	311173	4.69e-05	0.170118	0.139373
NELL2	6	rs140156182	12	45477268	A	G	ILMN_1725417	-574808	4.7e-05	0.170118	0.419635
PIK3IP1	4	rs182042333	22	31447397	T	G	ILMN_1719986	230407	4.7e-05	0.170118	0.56985
POFUT2	1	rs34990419	21	47373355	T	C	ILMN_1775823	-689225	4.72e-05	0.170423	-0.167394
MLF2	12	rs548367738	12	6973802	A	G	ILMN_1671885	-116313	4.73e-05	0.170423	-0.518671
AP1G1	4	rs191571438	16	72417492	C	T	ILMN_2399622	-653933	4.74e-05	0.170664	0.377864
CBR1	1	rs7278394	21	36635338	C	G	ILMN_1809003	-809704	4.76e-05	0.170931	-0.180441
LPCAT4	3	rs17817476	15	33952723	G	C	ILMN_1674759	698702	4.81e-05	0.170931	-0.103764
NOTCH3	5	rs140417276	19	15152492	T	C	ILMN_1658926	117987	4.84e-05	0.170931	-0.538155
TMEM206	1	rs1663626	1	212422567	A	C	ILMN_3247821	115521	4.86e-05	0.170931	-0.170748
ALDH3A2	2	rs138986545	17	19553355	A	G	ILMN_2401641	-27088	4.87e-05	0.170931	-0.405821
CAPN12	1	rs4575642	19	39295863	C	T	ILMN_2101034	-74617	4.89e-05	0.170931	0.25541
RANBP6	10	rs559173917	9	6394341	G	A	ILMN_2177732	-382865	4.9e-05	0.170931	0.267075
GLI2	2	rs72959281	2	121827729	G	A	ILMN_1727577	79148	4.91e-05	0.170931	0.17901
PTPLB	15	rs553483995	3	123210950	A	C	ILMN_1690806	-73	4.91e-05	0.170931	-0.549532
SENP5	2	rs73208044	3	195740284	G	C	ILMN_1675501	-917450	4.91e-05	0.170931	0.265822
GLB1	15	rs188046795	3	33050791	A	G	ILMN_1735155	-12366	4.97e-05	0.170931	-0.332895

## Sheet: Suppl.Table.7
Suppl.Table.7	Overlaps with genomic regions associated with hair shape and hair color.
eSNP	Chr	Position	Overlapping lead SNP	Nearest gene	eGene	Hair trait
rs11203346	1	17600822	rs11203346	PADI3	PADI3	Shape
rs11203346	1	17600822	rs72646785	PADI3	PADI3	Color
rs72646785	1	17603472	rs11203346	PADI3	PADI3	Shape
rs72646785	1	17603472	rs72646785	PADI3	PADI3	Color
rs11585119	1	17605792	rs11203346	PADI3	PADI3	Shape
rs11585119	1	17605792	rs72646785	PADI3	PADI3	Color
rs11584287	1	17607501	rs11203346	PADI3	PADI3	Shape
rs11584287	1	17607501	rs72646785	PADI3	PADI3	Color
rs72646789	1	17610030	rs11203346	PADI3	PADI3	Shape
rs72646789	1	17610030	rs72646785	PADI3	PADI3	Color
rs72646795	1	17612120	rs11203346	PADI3	PADI3	Shape
rs72646795	1	17612120	rs72646785	PADI3	PADI3	Color
rs72646796	1	17612503	rs11203346	PADI3	PADI3	Shape
rs72646796	1	17612503	rs72646785	PADI3	PADI3	Color
rs113593167	1	17613355	rs11203346	PADI3	PADI3	Shape
rs113593167	1	17613355	rs72646785	PADI3	PADI3	Color
rs72646797	1	17613838	rs11203346	PADI3	PADI3	Shape
rs72646797	1	17613838	rs72646785	PADI3	PADI3	Color
rs72646798	1	17614422	rs11203346	PADI3	PADI3	Shape
rs72646798	1	17614422	rs72646785	PADI3	PADI3	Color
rs11587669	1	17616259	rs11203346	PADI3	PADI3	Shape
rs11587669	1	17616259	rs72646785	PADI3	PADI3	Color
rs11588418	1	17616445	rs11203346	PADI3	PADI3	Shape
rs11588418	1	17616445	rs72646785	PADI3	PADI3	Color
rs72633803	1	17616758	rs11203346	PADI3	PADI3	Shape
rs72633803	1	17616758	rs72646785	PADI3	PADI3	Color
rs72633804	1	17617024	rs11203346	PADI3	PADI3	Shape
rs72633804	1	17617024	rs72646785	PADI3	PADI3	Color
rs72633805	1	17617471	rs11203346	PADI3	PADI3	Shape
rs72633805	1	17617471	rs72646785	PADI3	PADI3	Color
rs72633806	1	17617943	rs11203346	PADI3	PADI3	Shape
rs72633806	1	17617943	rs72646785	PADI3	PADI3	Color
rs72633808	1	17618665	rs11203346	PADI3	PADI3	Shape
rs72633808	1	17618665	rs72646785	PADI3	PADI3	Color
rs55912928	1	17621520	rs11203346	PADI3	PADI3	Shape
rs55912928	1	17621520	rs72646785	PADI3	PADI3	Color
rs111498656	1	17621619	rs11203346	PADI3	PADI3	Shape
rs111498656	1	17621619	rs72646785	PADI3	PADI3	Color
rs72633812	1	17623140	rs11203346	PADI4	PADI3	Shape
rs72633812	1	17623140	rs72646785	PADI4	PADI3	Color
rs11576697	1	17623961	rs11203346	PADI4	PADI3	Shape
rs11576697	1	17623961	rs72646785	PADI4	PADI3	Color
rs12095095	1	17625832	rs11203346	PADI4	PADI3	Shape
rs12095095	1	17625832	rs72646785	PADI4	PADI3	Color
rs72633814	1	17626456	rs11203346	PADI4	PADI3	Shape
rs72633814	1	17626456	rs72646785	PADI4	PADI3	Color
rs56265095	1	17626964	rs11203346	PADI4	PADI3	Shape
rs56265095	1	17626964	rs72646785	PADI4	PADI3	Color
rs74671692	1	17628059	rs11203346	PADI4	PADI3	Shape
rs74671692	1	17628059	rs72646785	PADI4	PADI3	Color
rs112597506	1	17628832	rs11203346	PADI4	PADI3	Shape
rs112597506	1	17628832	rs72646785	PADI4	PADI3	Color
rs72633823	1	17630779	rs11203346	PADI4	PADI3	Shape
rs72633823	1	17630779	rs72646785	PADI4	PADI3	Color
rs4625336	1	17630964	rs11203346	PADI4	PADI3	Shape
rs4625336	1	17630964	rs72646785	PADI4	PADI3	Color
rs112208664	1	17632010	rs11203346	PADI4	PADI3	Shape
rs112208664	1	17632010	rs72646785	PADI4	PADI3	Color
rs72633828	1	17632251	rs11203346	PADI4	PADI3	Shape
rs72633828	1	17632251	rs72646785	PADI4	PADI3	Color
rs34324150	1	17632464	rs11203346	PADI4	PADI3	Shape
rs34324150	1	17632464	rs72646785	PADI4	PADI3	Color
rs4975131	4	79420579	rs6533756	FRAS1	ANXA3	Shape
rs4975134	4	79420787	rs6533756	FRAS1	ANXA3	Shape
rs7677541	4	79420864	rs6533756	FRAS1	ANXA3	Shape
rs7695038	4	79420870	rs6533756	FRAS1	ANXA3	Shape
rs55649143	4	79427862	rs6533756	FRAS1	ANXA3	Shape
rs1390746	4	79451461	rs6533756	FRAS1	ANXA3	Shape
rs61284375	4	79453954	rs6533756	FRAS1	ANXA3	Shape
rs56414193	4	79453994	rs6533756	FRAS1	ANXA3	Shape
rs56212709	4	79454083	rs6533756	FRAS1	ANXA3	Shape
rs1496596	4	79454207	rs6533756	FRAS1	ANXA3	Shape
rs1496595	4	79454211	rs6533756	FRAS1	ANXA3	Shape
rs1390744	4	79454805	rs6533756	FRAS1	ANXA3	Shape
rs2867445	4	79454893	rs6533756	FRAS1	ANXA3	Shape
rs4610364	4	79455115	rs6533756	FRAS1	ANXA3	Shape
rs4975070	4	79455714	rs6533756	FRAS1	ANXA3	Shape
rs12648204	4	79456115	rs6533756	FRAS1	ANXA3	Shape
rs11098224	4	79456186	rs6533756	FRAS1	ANXA3	Shape
rs12641956	4	79456190	rs6533756	FRAS1	ANXA3	Shape
rs11098225	4	79456230	rs6533756	FRAS1	ANXA3	Shape
rs12639818	4	79456404	rs6533756	FRAS1	ANXA3	Shape
rs12639828	4	79456480	rs6533756	FRAS1	ANXA3	Shape
rs28514647	4	79456533	rs6533756	FRAS1	ANXA3	Shape
rs28391466	4	79456666	rs6533756	FRAS1	ANXA3	Shape
rs28434623	4	79456675	rs6533756	FRAS1	ANXA3	Shape
rs10025220	4	79457056	rs6533756	FRAS1	ANXA3	Shape
rs7664814	4	79458823	rs6533756	FRAS1	ANXA3	Shape
rs8070929	17	79530993	rs34872037	NPLOC4	TSPAN10	Color
